1 **Response of the plant core microbiome to *Fusarium oxysporum* infection and**  
2 **identification of the pathobiome.**

3

4 Zhiguang Qiu<sup>1</sup>, Jay Prakash Verma<sup>1,2</sup>, Hongwei Liu<sup>1</sup>, Juntao Wang<sup>1,3</sup>, Bruna D Batista<sup>1</sup>,  
5 Simranjit Kaur<sup>1</sup>, Arthur Prudêncio de Araujo Pereira<sup>1</sup>, Catriona A. Macdonald<sup>1</sup>, Pankaj  
6 Trivedi<sup>4</sup>, Tim Weaver<sup>5</sup>, Warren C. Conaty<sup>5</sup>, David T. Tissue<sup>1,3</sup>, Brajesh K. Singh<sup>1,3\*</sup>

7

8 <sup>1</sup> Hawkesbury Institute for the Environment, Western Sydney University, Penrith, NSW,  
9 Australia

10 <sup>2</sup> Institute of Environment and Sustainable Development, Banaras Hindu University, Varanasi,  
11 221005, Uttar Pradesh, India

12 <sup>3</sup> Global Centre for Land-Based Innovation, Western Sydney University, Penrith, NSW,  
13 Australia

14 <sup>4</sup> Microbiome Network and Department of Agricultural Biology, Colorado State University,  
15 Fort Collins 80523, CO, USA

16 <sup>5</sup>CSIRO Agriculture & Food, Locked Bag 59, Narrabri NSW, 2390 Australia

17

18

19 \*Corresponding author: Brajesh Kumar Singh; E-mail address:  
20 b.singh@westernsydney.edu.au

21

22

23 **Summary**

24 Plant core microbiomes consist of persistent key members that provide critical host functions,  
25 but their assemblages can be interrupted by biotic and abiotic stresses. The pathobiome is  
26 comprised of dynamic microbial interactions in response to disease status of the host. Hence,  
27 identifying variation in the core microbiome and pathobiome can significantly advance our  
28 understanding of microbial-microbial interactions and consequences for disease progression  
29 and host functions. In this study, we combined glasshouse and field studies to analyse the soil  
30 and plant rhizosphere microbiome of cotton plants (*Gossypium hirsutum*) in the presence of a  
31 cotton-specific fungal pathogen, *Fusarium oxysporum* f. sp. *vasinfectum* (FOV). We found  
32 that FOV directly and consistently altered the rhizosphere microbiome, but the biocontrol  
33 agents enabled microbial assemblages to resist pathogenic stress. Using co-occurrence  
34 network analysis of the core microbiome, we identified the pathobiome comprised of the  
35 pathogen and key associate phylotypes in the cotton microbiome. Isolation and application of  
36 some negatively correlated pathobiome members provided protection against plant infection.  
37 Importantly, our field survey from multiple cotton fields validated the pattern and responses  
38 of core microbiomes under FOV infection. This study advances key understanding of core  
39 microbiome responses and existence of plant pathobiomes, which provides a novel  
40 framework to better manage plant diseases in agriculture and natural settings.

41

42 **Keywords**

43 Rhizosphere soil microbiome, Core microbiome; Pathobiome; Biocontrol; Cotton industry;  
44 *Fusarium oxysporum*; Co-occurrence network.

45

## 46 **Introduction**

47 Plant diseases caused by a diverse range of soil-borne pathogens are major constraints of  
48 primary productivity worldwide (Strange and Scott, 2005). A recent study predicted that  
49 climate change would significantly increase the abundance of potential soil-borne pathogens  
50 in global soils with potential negative impacts on food security (Delgado-Baquerizo *et al.*,  
51 2020; Chaloner *et al.*, 2021). Typical methods of disease control in agriculture rely heavily  
52 on synthetic chemicals (e.g., biocides), cultivar selection, plant breeding, and management  
53 practices such as crop rotations (Yang *et al.*, 2008; Ulloa *et al.*, 2020). However, for several  
54 soil-borne fungal pathogens, the use of chemical and plant breeding control measures is  
55 becoming increasingly ineffective (Hollomon, 2015; Lucas *et al.*, 2015). Additionally,  
56 management approaches (e.g., crop rotation) can have significant economic consequences,  
57 particularly where crop selection is limited by environmental conditions and where pathogens  
58 can survive for long-periods of time in soils in the absence of preferred hosts (Göre *et al.*,  
59 2009). Furthermore, in field conditions, disease incidence is a function of the interactions  
60 between the host, pathogen, and environmental conditions including plant/soil associated  
61 microbiota (Trivedi *et al.*, 2017a; Trivedi *et al.*, 2017b). Therefore, deepening our  
62 understanding of how pathogens survive, respond to management practices, and interact with  
63 other soil biota, is considered an important priority. Such knowledge is needed to develop  
64 effective and environmentally sustainable approaches to manage plant diseases (Padda *et al.*,  
65 2017; Qiu *et al.*, 2019).

66 In recent years, the role of indigenous soil microbiomes in suppressing plant diseases in both  
67 glasshouse and field conditions have been widely reported (Schlatter *et al.*, 2017; Bakker *et al.*,  
68 2018; Berendsen *et al.*, 2018; Kwak *et al.*, 2018; Carrión *et al.*, 2019; Wei *et al.*, 2019;  
69 Liu *et al.*, 2020). Given their intimate contact with the plant environment, rhizosphere  
70 microbiomes (i.e. soil associated directly with plant roots) are proposed to play an even more  
71 important role in protection against pathogen invasion than bulk soil microbiomes (Singh *et al.*,  
72 2020; Trivedi *et al.*, 2020). Rhizosphere microbiomes can act to protect the plant against  
73 soil-borne pathogens via several mechanisms, including direct competition with pathogens  
74 for resources and space, active production of antibiotics effective against the pathogen, or  
75 indirectly by priming the host's immune system (Leoni *et al.*, 2020; Liu *et al.*, 2020; Trivedi  
76 *et al.*, 2020). For example, recent work reported an enrichment of *Stenotrophomonas*  
77 *rhizophila* (SR80) in the wheat rhizosphere and root endosphere in response to *Fusarium*  
78 *pseudograminearum* infection. Such enrichment contributed to plant disease tolerance via

79 interacting with plant defence signalling pathways (Liu *et al.*, 2021a). Similarly, plant  
80 cultivar dependent pathogen suppression (e.g., tomato) was reported to be linked with  
81 unexpected selection of specific bacterial species in the root environment leading to disease  
82 suppression (Kwak *et al.*, 2018). In addition to specific microbial species being associated  
83 with increased resistance to plant pathogens, microbial diversity, and community structure  
84 have also been linked with disease suppression (Hu *et al.*, 2016; Trivedi *et al.*, 2020). It is  
85 likely that plant microbiomes utilise multiple biotic mechanisms to defend against pathogens  
86 which may vary between different pathogens, management practices and climatic conditions.  
87 Such complexity makes it challenging to identify and generalise the direct role that microbial  
88 communities play in disease suppression. Therefore, unravelling the role of microbial  
89 diversity and composition in disease protection, as well as their interaction with plant hosts  
90 and pathogens are crucial in the context of better understanding of disease incidence and its  
91 management.

92 The plant rhizosphere microbiome assembly is dynamic and therefore identifying the  
93 persistent (core) members of the plant microbiome has been proposed as a tool to advance  
94 understanding of soil-plant-microbiome interactions (Benson *et al.*, 2010; Ainsworth *et al.*,  
95 2015; Chen *et al.*, 2018; Schlatter *et al.*, 2020) and key host functions (both negative and  
96 positive) provided by rhizosphere microbiomes (Shade & Handelsman, 2012; Singh *et al.*,  
97 2020). The core microbiome is comprised of members of microbial assemblages commonly  
98 present in hosts or within particular niches of a broad host community (Turnbaugh *et al.*,  
99 2007). In the context of the rhizosphere, the core microbiome of a plant species represent  
100 persistent microbial taxa associated with their host rhizosphere soils, regardless of their  
101 environmental conditions, geographical locations or management practices (Lemanceau *et al.*,  
102 2017). It has been reported that beneficial members of the core microbiome are critically  
103 involved in plant performance (Chen *et al.*, 2018), and therefore, any direct and indirect  
104 changes in the core microbiome induced by disease can potentially alter host functions and  
105 phenotypes related to disease resistance and/or growth (Xu *et al.*, 2018; Kaushal *et al.*, 2020).  
106 Furthermore, some members of the core microbiome may provide an effective source of  
107 biocontrol agents against plant disease because of their ability to rapidly colonise plant  
108 surfaces and inner tissues and act as a first line of defence against invading pathogens;  
109 however, some members can also promote invasion of plant pathogens (Qiu *et al.*, 2019;  
110 Singh *et al.*, 2020). Therefore, the identity of the core members of the rhizosphere soil

111 microbiome, their function, and response to biotic and abiotic drivers, is critically important  
112 to advance our understanding of the role of the soil microbiome in host performance.

113 The pathobiome, which is an emerging concept, considers disease as the manifestation of  
114 multiple interactions among several microbial species, including pathogens, which affect the  
115 health and disease status of the host (Vayssier-Taussat *et al.*, 2014; Sweet & Bulling, 2017;  
116 Bass *et al.*, 2019). Specifically, co-occurrence network analysis has been used previously to  
117 understand microbial interactions at interkingdom scales and to decode the influence of  
118 pathogen invasion on the indigenous microbial communities (Erlacher *et al.*, 2014; Wei *et al.*,  
119 2015; Bass *et al.*, 2019; Pauvert *et al.*, 2020). Given that the pathobiome can be dynamic  
120 under different host and environmental conditions, using core members of the rhizosphere  
121 soil microbiome to identify the pathobiome could pinpoint microbial species that interact  
122 consistently with the target pathogen. However, both the existence of the pathobiome and its  
123 role in plant disease occurrence are yet to be fully explored.

124 The aim of this study was to identify the response of plant rhizosphere and bulk soil  
125 microbiomes to pathogen invasion and to determine whether application of biocontrol agents  
126 can resist the impact of pathogens. Furthermore, we aimed to identify the existence of  
127 pathobiomes in plant diseases. We selected cotton as our model plant host because globally it  
128 is a major cash crop, but is subject to significant loss of productivity globally (Davis *et al.*,  
129 1996; Davis *et al.*, 2006) as a result of destructive disease caused by the fungal  
130 pathogen *Fusarium oxysporum* f. sp. *vasinfectum* (thereafter FOV) . We combined glasshouse  
131 and field studies to first analyse the soil and rhizosphere microbiome of cotton plants  
132 (*Gossypium hirsutum*) in the presence and absence of FOV. We then examined the impact of  
133 biocontrol agents on soil and rhizosphere microbiomes. Using co-occurrence network  
134 analysis of the core microbiome, we identified the pathobiome. Importantly, findings from  
135 our glasshouse work were validated using extensive field surveys, where microbiome and  
136 pathogen data were collected from multiple cotton fields that were infected with FOV or were  
137 FOV-free.

138

## 139 **Results**

### 140 **Effect of pathogen and biocontrol agents on plant performance and soil and rhizosphere** 141 **microbiomes**

142 To test the impact of FOV on cotton plant performance and associated plant microbiomes,  
143 and to examine the protective effect of biocontrol agents, three treatments were established in  
144 the glasshouse experiment: FOV inoculated (F); FOV plus biocontrol treatment (FB); and a  
145 non-treated control (C). Four widely used cotton cultivars (V1 = CIM 448, V2 = Siokra L23,  
146 V3 = CS 50, V4 = DP 16) and two soil types (clay soil and clay-sandy soil, detailed  
147 information described below) were used with three replicates for each treatment combination.  
148 Overall, we found the treatment using the biocontrol agent reduced the level of FOV  
149 infection. In F treatment, 25% of plants were diseased as confirmed by the observation of  
150 brown rings in the cross-sections of stems, while application of synthetic biocontrol  
151 community reduced infection to 13.3% in FB treatment (Figure S1). The quantitative PCR  
152 (qPCR) confirmed a significantly higher pathogen abundance in FOV-inoculated soil than  
153 uninoculated soil across all samples at seedling stage ( $P < 0.05$ , Figure S2). Disease incidence  
154 was found higher in in the presence of pathogen (Figure S1), while no significant effect of  
155 pathogen treatment on seed germination rate and plant height varied across different cotton  
156 cultivars ( $P > 0.05$ ). Cotton productivity was slightly lower (~3 %) in the presence of the  
157 pathogen (Figure S1), but differences were not statistically significant ( $P > 0.05$ ). In cotton  
158 soil microbial communities, samples were rarefied to equal sequencing depth per sample,  
159 resulting in a total number of 4,271,083 bacterial sequences spanning 13,445 OTUs and  
160 13,650,185 fungal sequences spanning 7,031 OTUs. Although rarefaction curves of the  
161 bacterial sequences did not reach plateau, an average of 11,129 reads per sample were used,  
162 with approximately nine times of average richness per sample, suggesting good coverage of  
163 the microbial diversity present (Figure S3). Despite the significant differences between the  
164 two soil types and between bulk and rhizosphere soils (Figure S4A & B), we mainly focused  
165 on the variation of microbiomes under different treatments to evaluate the effect of pathogens  
166 and biocontrol agents.

167 In the glasshouse experiment, no significant difference was found in microbial diversity  
168 across different treatments in bulk soil samples ( $P > 0.05$ , Table S4, Figure S5A & B). In the  
169 rhizosphere soils, bacterial communities had significantly higher Shannon and Simpson  
170 indices in F treatment compared to bacterial communities in C and FB treatments ( $P < 0.05$ ,  
171 Table S4, Figure S5A). In combination with qPCR results, the presence of FOV in bulk soil  
172 may increase Shannon and Simpson indices (i.e. increase community evenness). For fungal  
173 communities, in both rhizosphere and bulk soils, a lower Chao1 index was found in the FB  
174 treatment compared to C and F treatments ( $P < 0.05$ , Figure S5B, Table S4), implying that

175 application of biocontrol agents might reduce the fungal richness. There were no significant  
176 differences in either bacterial or fungal alpha diversity indices observed in field samples ( $P >$   
177  $0.05$ , Table S4, Figure S5C & D).

178 Furthermore, there was no significant treatment effect, or of their interaction on either  
179 bacterial or fungal communities associated with bulk soil ( $P > 0.05$ , Table S5). However,  
180 there were significant differences in the interaction between treatments, soil type and time in  
181 the rhizosphere bacterial communities and the interaction between soil and time in the  
182 rhizosphere fungal communities ( $P < 0.05$ , Table S5). Specifically, a consistent pattern was  
183 found across the two soil types at seedling stage where the rhizosphere bacterial community  
184 in treatments C and FB were different from treatment F, but no significant difference was  
185 found between C and FB ( $P < 0.05$ , Table 1A). This pattern was also aligned with the alpha  
186 diversity results (Table S4). Interestingly, no difference was observed between treatments in  
187 either bacterial or fungal communities in rhizosphere samples at flowering stage ( $P > 0.05$ ,  
188 Table 1A). Principal coordinates analysis (PCoA) also demonstrated that rhizosphere  
189 bacterial communities were mainly differentiated by treatment at the seedling stage, but  
190 tended to be similar between treatments at the flowering stage (Figure 1).

191 Data from the field samples showed consistent and significant differences in both bacterial  
192 and fungal communities of diseased plants in diseased fields compared to plants in healthy  
193 fields in bulk soil samples from the Macquarie region ( $P < 0.05$ , Table 1B, Table S6), while  
194 rhizosphere communities of all plants (symptomatic and asymptomatic) from diseased fields  
195 were different from healthy fields in St George region ( $P < 0.05$ , Table 1B, Table S6).  
196 Principal coordinates analysis (PCoA) plots showed that location, along with the health status  
197 of plants, directly influenced the variation of microbial communities, but no differences were  
198 evident between symptomatic and asymptomatic plants from within disease fields (Figure  
199 S4C & D).

#### 200 **Response of microbial phylotypes to diseases incidence.**

201 The use of the biocontrol significantly altered the impact that the pathogen had on  
202 rhizosphere microbiomes. Results showed that bacterial communities differed significantly  
203 between C and F, FB and F, but not between FB and C during seedling stage (Table 1). To  
204 further investigate the treatment effect on representative OTUs in the rhizosphere  
205 microbiome at the seedling stage, microbial communities were analysed at the OTU level  
206 using LEfSe. Overall, distinct rhizosphere bacterial OTU indicators were found between



207 treatments irrespective of growth stage or soil type (Figure 2A). Specifically, indicator OTUs  
208 representative of treatment F mainly belonged to Actinobacteria and Bacteroidetes phyla, and  
209 to the class Alphaproteobacteria. Representative OTUs of C and FB treatments belonged to  
210 the phylum Firmicutes and the class Gamma proteobacteria, respectively (Figure 2A). In field  
211 samples, OTU indicators of healthy and diseased fields belonged mainly to the phylum  
212 Proteobacteria and phylum Firmicutes, respectively (Figure 2B). Despite contrasting  
213 microbial compositions between glasshouse and field rhizosphere soils, similar trends of  
214 enrichment of OTUs belonging to Proteobacteria in treatment FB and healthy fields were  
215 observed (Figure 2A & B). For fungal indicators in the glasshouse experiment, a majority of  
216 representative OTUs of treatment F belonged to the phylum Zygomycota, whereas OTUs of  
217 treatment FB were found in Ascomycota and Basidiomycota phyla (Figure 2C). In field  
218 samples, although indicator OTUs from different phenotypes of cotton plants in diseased  
219 field were mainly found from the phylum Ascomycota, a majority of representative OTUs  
220 from healthy plants belonged to Onygenales, Hypocreales and Microascales orders, while  
221 OTUs from diseased plants belonged to Xylariales and Eurotiales orders (Figure 2D).

#### 222 **Disruptions of cotton core members of rhizosphere microbiome under FOV attack**

223 To identify the core members of the rhizosphere microbiome, OTUs that were present in >75%  
224 of samples of a particular treatment group were extracted as the core microbiome. When  
225 OTUs from all available glasshouse treatments were combined, only 72 (0.98%) of total  
226 bacterial, and, 53 (1.15%) of total fungal OTUs from all treatments were considered as core  
227 OTUs, but represented 56.79% and 4.36% of total relative abundance, respectively (Figure  
228 3A). In field samples, 90 (1.39%) of total bacterial and 96 (2.48%) of total fungal OTUs  
229 across all samples were identified as core, accounting for 51.55% and 2.96% of total relative  
230 abundance, respectively (Figure 3). Given inconsistency and lack of dominance of core  
231 fungal biota, we mainly focus on bacterial core microbiomes for further analyses. There was  
232 significant overlap between field and glasshouse data. Thirty-three core OTUs were shared  
233 between glasshouse and field samples, which were mainly members of the phyla  
234 Actinobacteria, Firmicutes, Gemmatimonadetes, Proteobacteria and Ascomycota (Figure 4,  
235 Table S7), suggesting a similar pattern of core taxa could be found in cotton rhizosphere  
236 irrespective of the geographical location, soil type or plant vegetation stage. Relative  
237 abundance of bacterial core OTUs showed that dominant OTUs (e.g., OTU00001,  
238 OTU00002 and OTU00007) decreased significantly in glasshouse core rhizosphere  
239 microbiome under FOV treatments. This negative impact of FOV on relative abundances of



240 these OTUs was protected by biocontrol treatment (Figure 3A). Similarly, dominant  
241 rhizosphere core OTUs were higher in healthy plants, particularly healthy individuals in  
242 diseased fields (e.g., OTU00002, OTU00028 and OTU00036, Figure 3B). Importantly,  
243 OTU00002 (*Bacillus* sp.) was consistently found in both glasshouse and field samples,  
244 suggesting this bacterial species could be closely related to plant fitness under *Fusarium*  
245 invasion. In fungal communities, OTUs shared between glasshouse and field samples were  
246 mainly from genera *Fusarium*, *Acremonium*, *Chrysosporium* and family *Chaetomiaceae*  
247 (Table S7). Full information of core OTUs and relative abundances are listed in Table S7 and  
248 S8.

### 249 **FOV pathobiome in fungal-bacterial networks**

250 The co-occurrence network analysis of bacterial/fungal OTUs with strong correlations ( $|r| >$   
251 0.6) showed that fewer associations were found in the presence of biocontrol agent (FB,  
252 Figure 5A) compared to control (C) and FOV-treated (F) samples. Presence of FOV seemed  
253 to increase the bacterial positive associations in the glasshouse experiment compared to non-  
254 FOV treated soils (C vs F, Figure 5A, Table S9). We found similar results for healthy plants  
255 from healthy fields (FF, Figure 5B, Table S9). In addition, higher fungal-fungal associations  
256 were found in healthy plants, which was consistent in both glasshouse and field samples  
257 (Table S9).

258 To identify the *F. oxysporum* pathobiome, OTUs associated with *F. oxysporum* were  
259 extracted from the network. In the glasshouse experiment, nine bacterial and 24 fungal OTUs  
260 were significantly ( $P < 0.05$ ) associated and strongly correlated ( $|r| > 0.6$ ) with *F. oxysporum*  
261 (Figure 6A), while 23 bacterial and 32 fungal OTUs were significantly ( $P < 0.05$ ) associated,  
262 and strongly correlated ( $|r| > 0.6$ ) with *F. oxysporum* (Figure 6B) in field samples, which  
263 identified as key pathobiome. Overall, an overlap in bacterial pathobiomes of glasshouse and  
264 field samples was observed from members of Actinobacteria, Firmicutes and Proteobacteria  
265 phyla. Similarly, the overlap in fungal pathobiomes observed at phylum level were  
266 Ascomycota and Zygomycota. A number of fungal OTUs were consistently found in the  
267 pathobiome of both glasshouse and field samples, including OTUs classified as *Acremonium*  
268 *alternatum*, *Chrysosporium pilosum*, sp., *Microascaeae* sp., *Eurotiomycetes* sp., and one  
269 unclassified Ascomycota that was negatively associated with *F. oxysporum* (Figure 6), which  
270 may be considered as potential antagonists against *F. oxysporum*. We successfully isolated  
271 five bacteria with antifungal activity against FOV that were identical to key members of

272 pathobiome (based at > 97% similarity of sequences) identified by network analysis (Table  
273 S10), suggesting that the corresponding bacterial taxa in the pathobiome have a role in  
274 pathogenesis.

275

## 276 **Discussion**

### 277 **Fusarium infection shifts early microbial colonisation**

278 Our results provide empirical evidence for the direct impact of pathogens on rhizosphere soil  
279 microbial communities at the seedling stage. Such shift of microbial communities influenced  
280 by fungal pathogens has been observed in other plants, such as banana, wheat and watermelon  
281 (Shen *et al.*, 2018; Araujo *et al.*, 2019; Wang *et al.*, 2019). Biotic environmental stresses (e.g.  
282 plant diseases) can potentially trigger changes in rhizosphere microbial communities via  
283 direct interactions with invading pathogens or indirectly via altered plant root exudation and  
284 changes in plant physiology (Gu *et al.*, 2016; Liu *et al.*, 2020). The evidence that seedlings  
285 are more susceptible to FOV infection aligns with other plant pathogens (Develey - Rivière  
286 & Galiana, 2007), likely due to the lack of a fully developed plant immune system, which is  
287 both plant and microbial-mediated. In contrast, little difference in the rhizosphere  
288 microbiome was observed at the flowering stage, which indicates that plants are able to  
289 regulate rhizosphere communities via secondary metabolisms at later stages of development,  
290 irrespective of the status of disease incidence at seedling stage (Liu *et al.*, 2020). Our  
291 glasshouse results were supported by field data, where asymptomatic plants in diseased fields  
292 had similar microbial assemblages to plants in healthy fields (Table 1B). Our finding is also  
293 consistent with the report that FOV has stronger impact on plants at the early stage of  
294 development (Bugbee, 1970), which means once plants escape the severe disease, they are  
295 able to maintain fitness and productivity at later stages. In bulk soils, differences of microbial  
296 communities were driven by the soil types and plant cultivars, indicating that cotton plants  
297 may be more responsible for the assemblage of the rhizosphere microbiome than bulk soil in  
298 the Macquarie fields (Table 1B, Hamonts *et al.*, 2018; Xiong *et al.*, 2021a; Xiong *et al.*,  
299 2021b). Markedly, in the glasshouse experiment, no significant difference was observed in  
300 rhizosphere microbial community between healthy and FOV with biocontrol treatments,  
301 implying that the biocontrol agent was able to protect plants from FOV attack. The effect of  
302 biocontrol agent could be further supported by a bacteria-only treatment, similar to a recent  
303 study on wheat (Liu *et al.*, 2021b). Overall, our results demonstrated that FOV can introduce

304 significant shifts in the rhizosphere microbiome at an early stage of plant development, when  
305 plants are most vulnerable to pathogen attack, but the use of a biocontrol can resist the  
306 negative impact of FOV.

### 307 **Persistent members of plant microbiome are responsive to FOV infection**

308 This study provides the first report on the cotton rhizosphere core members of microbiome  
309 and its temporal and disease-induced changes in both glasshouse and field conditions. It  
310 consisted of a wide range of taxa from Actinobacteria, Firmicutes, Proteobacteria (mainly  
311 Alphaproteobacteria and Gammaproteobacteria), Ascomycota and a few taxa from other  
312 phyla. Although rhizosphere samples collected in the field were not treated identically as in  
313 glasshouse, which could potentially cause variations of microbial communities in the analysis,  
314 there were common bacterial genera observed as core microbiota such as *Bacillus*,  
315 *Burkholderia*, *Pseudomonas*, *Rhizobium*, *Streptomyces* and *Xanthomonas*, aligned with other  
316 crops such as sugarcane, canola and wheat (Hamonts *et al.*, 2018; Lay *et al.*, 2018; Schlatter  
317 *et al.*, 2020). However, there were a few taxa exclusively found in cotton rhizosphere  
318 microbiomes, such as *Azotobacter*, *Microvirga*, *Skermanella*, and *Steroidobacter*. These  
319 findings indicate that core members of microbiomes can consist of both generalist (common  
320 in many plant species) and specialist (plant species specific) members, which may  
321 synergistically respond to and play crucial roles in plant interactions with pathogens (Trivedi  
322 *et al.*, 2020).

323 Specific members of the rhizosphere core microbiome could possibly be altered under  
324 significant biotic stresses (Erlacher *et al.*, 2014; Hamonts *et al.*, 2018). Our results revealed  
325 that FOV-induced changes in core members of the rhizosphere microbiome can be observed  
326 in both identity and abundance, especially in members of Actinobacteria,  
327 Alphaproteobacteria, Gammaproteobacteria and in fungal taxon *Fusarium*. As the ITS region  
328 was selected for fungal community analysis, confirming whether the *Fusarium* OTUs are  
329 inoculated FOV or other *Fusarium* strains, including non-pathogenic *Fusarium*, would be  
330 difficult. Remarkably, relative abundance of a wide range of potential biocontrol agents were  
331 enriched in the rhizosphere under disease conditions, such as *Streptomyces* sp., *Microbispora*  
332 sp. and *Nocardioides* sp. in the phylum Actinobacteria (Misk & Franco, 2011; Palaniyandi *et al.*,  
333 2013; de Jesus Sousa & Olivares, 2016; Essarioui *et al.*, 2017; Cabrera *et al.*, 2020), and  
334 *Pseudomonas* sp. and *Sphingomonas* sp. in the class Gammaproteobacteria (Babu *et al.*, 2000;  
335 Wachowska *et al.*, 2013). These findings potentially support the recent evidence for the ‘cry

336 for help' strategy of plants under pathogen attacks (Liu *et al.*, 2020), and may suggest that  
337 such a strategy of accumulating beneficial microbes in plant microbiomes could be common  
338 in many plant species.

339 Importantly, while differences in the rhizosphere microbiome between treatments were  
340 mainly observed at the seedling stage, we found that the relative abundance of core members  
341 of the rhizosphere microbiome also differed between control and FOV treatments, indicating  
342 that FOV fundamentally changed the core members of the cotton rhizosphere microbiome,  
343 regardless of the soil type and plant cultivar. This pattern was also found in our extensive  
344 field surveys, where flowering cotton plants were investigated and a consistent shift in certain  
345 core members of the rhizosphere microbiome was observed from plants from diseased and  
346 healthy fields (e.g. *Bacillus* sp., *Solirubrobacter* sp., *Streptomyces* sp., etc.). Previous studies  
347 have demonstrated that a shift in core members of the microbiome and their functions can  
348 have prominent negative impacts on plant fitness, although the magnitude of the impact likely  
349 varies depending on plant species and microbial taxa (Vandenkoornhuyse *et al.*, 2015; Chen  
350 *et al.*, 2018; Hamonts *et al.*, 2018). The core identity of microbiomes is emerging, so a better  
351 understanding of the mechanisms that drive shifts in core microbiomes, and consequences for  
352 host functions, should be the focus of future research. Such knowledge will foster pathways  
353 for harnessing plant microbiomes to improve plant health and productivity in both natural and  
354 agricultural settings.

### 355 **Identity of pathobiome**

356 Members of a microbiome continuously interact with each other and maintain underground  
357 microbial ecosystems, providing feedbacks to plant productivity and soil health (Kulmatiski  
358 & Beard, 2011; Lamb *et al.*, 2011). The microbial network analyses demonstrated more  
359 correlations between microbes in FOV-infected than in non-infected samples of both  
360 glasshouse and field data. While the correlation patterns in the field samples paralleled with  
361 the glasshouse samples, microbial networks were altered in FOV-infected samples, which is  
362 consistent with previous findings for other pathogens such as soil-borne *Ralstonia*  
363 *solanacearum* (Rybakova *et al.*, 2017; Wei *et al.*, 2018). Hence, the microbiome network  
364 status in the rhizosphere could influence plant fitness and be used to predict threats from  
365 potential pathogens.

366 The “pathobiome” concept has expanded our view from a single microorganism as a disease  
367 agent to a broader perspective of communities that co-affect a particular disease (Vayssier-

368 Taussat *et al.*, 2014; Sweet & Bulling, 2017), leading to a series of innovative pathobiome  
369 studies in human (Krezalek *et al.*, 2016), livestock (Tufts *et al.*, 2020), large marine  
370 organisms (Sweet *et al.*, 2019) and some plants (Doonan *et al.*, 2019). Our study has used the  
371 core members of microbiome to build the pathobiome of *F. oxysporum*, by initially  
372 narrowing the entire microbial community to the ubiquitous single species before identifying  
373 the pathobiome. This approach accommodates the identification of a core network, which can  
374 avoid screening the rare/ transitional taxa in the environment that occasionally appeared in  
375 soil and plant samples (Thomas *et al.*, 2016). While positive associations between pathogens  
376 and other microbiota may help pathogens to cause disease (Hoffman & Arnold, 2010;  
377 Jakuschkin *et al.*, 2016), they may also represent a common response in the stressed plants  
378 under pathogen attack (Sweet *et al.*, 2019). On the other hand, negative associations can be  
379 considered as potential biocontrol agents against specific pathogens (Pauvert *et al.*, 2020).  
380 Following the network analysis approach (Pauvert *et al.*, 2020), we extracted 78 bacterial and  
381 fungal OTUs from core network as the putative pathobiome of *F. oxysporum*, of which 32  
382 bacterial taxa were identified as key members of the pathobiome, including 19 taxa from the  
383 phylum Actinobacteria, suggesting these taxa potentially provide antifungal activities at early  
384 stages of the FOV infection (de Jesus Sousa & Olivares, 2016; Goudjal *et al.*, 2016). We  
385 were able to isolate five members of the pathobiome and they all showed antifungal activities  
386 against FOV suggesting these microbes have a direct role in pathogenesis and that negatively  
387 associated microbial taxa of the pathobiome can be considered as candidate biocontrol agents  
388 relevant to disease suppression. By identifying and isolating more members of the  
389 pathobiome (which either help or hinder pathogenesis), targeted disease management,  
390 including biocontrol agents against pathogens, could potentially be developed. However,  
391 further mechanistic understanding is required to apply such tools in agriculture and forestry  
392 settings. For example, a better understanding is needed regarding the mechanisms by which  
393 microbial taxa support or suppress disease development, and the ability to discriminate  
394 between taxa generating the effect (e.g., disease suppresser) from those present as  
395 opportunists.

### 396 **Biocontrol agents resist the impact of FOV on the rhizosphere microbiome**

397 There were significant differences between the rhizosphere microbiomes of control and FOV  
398 treated samples in the glasshouse experiment. This result was also consistent with our field  
399 data, which showed differences in plant rhizosphere microbiomes of healthy and diseased  
400 fields, providing evidence that the change in microbiome was driven by FOV infection

401 (Saravanakumar *et al.*, 2017; Wei *et al.*, 2018). However, FOV treated samples in the  
402 presence of biocontrol agents prevented such infection-induced changes in the rhizosphere in  
403 the glasshouse experiment. The variation of microbial communities between biocontrol  
404 treated and untreated rhizosphere samples under pathogen attack in our studies are consistent  
405 with previous work on wheat (Araujo *et al.*, 2019) and tomato (Elsayed *et al.*, 2020),  
406 suggesting that biocontrol agents can effectively protect the rhizosphere microbiome from  
407 significant impacts by pathogens.

408 Microbial interactions are crucial for disease development. Previous studies have provided  
409 evidence that negative interactions between pathogen and plant associated microbes can  
410 significantly enhance a plants ability to defend itself from the pathogen invasion (Gajbhiye *et*  
411 *al.*, 2010; Goudjal *et al.*, 2016; Araujo *et al.*, 2019). We found that apart from the bacterial  
412 taxa in the phylum Actinobacteria, additional bacterial taxa with antifungal properties were  
413 also abundant in the FB treatment, such as *Bacillus* sp., and *Brevibacillus* sp. from the  
414 phylum Firmicutes (Khan *et al.*, 2017; Jangir *et al.*, 2018; Johnson *et al.*, 2020), and  
415 *Pseudomonas* sp. from the class Gammaproteobacteria (Babu *et al.*, 2000; Arya *et al.*, 2018).  
416 These taxa have been commonly used as potential biocontrol agents (Szczecz & Shoda, 2006;  
417 Chen *et al.*, 2017; Sun *et al.*, 2017), and were frequently detected in our study, suggesting  
418 that the potential bacterial-fungal interactions disrupted by FOV were largely restored by the  
419 biocontrol treatment.

420 In the core members of the microbiome and network analyses presented here, FB treatment  
421 had less core OTUs / associations relative to control and FOV treatments, but most of which  
422 overlapped with the control treatment. This result is also supported by the beta diversity  
423 analysis ( $C \neq F$ ,  $FB \neq F$ ,  $C = FB$ ), which showed that core members of microbiome and  
424 network associations in FB remained similar to control, and, shifts in microbial community  
425 structure were minimised at the seedling stage. Network analysis does not identify positive  
426 and negative interactions, but rather provides associations. Current literature suggests that  
427 both interpretations are possible (Jakuschkin *et al.*, 2016; Sweet *et al.*, 2019) and  
428 manipulative experiments would be necessary in order to identify whether these associations  
429 were positive or negative interactions. Nevertheless, our work provides critical empirical  
430 evidence of microbial responses of disease incidence and provides a conceptual framework to  
431 develop and test targeted research on plant-microbial interactions under biotic stresses.

432 Overall, we provide evidence for the existence of a core microbiome of cotton which contains  
433 both generalists (common in many plant species) and specialists (plant species specific)  
434 members. We demonstrated that pathogen invasion results in a consistent shift in the  
435 rhizosphere microbiome and network associations, both in glasshouse and field conditions.  
436 FOV-induced shifts in the host and microbiome were prevented by treatment with biocontrol  
437 agents. Furthermore, we provide evidence for the existence of a pathobiome in plants, which  
438 provides a tool to identify microbiota that are positively associated with and facilitate  
439 pathogenesis. Similarly, negatively associated microbial taxa of the pathobiome may  
440 represent potential biocontrol agents. This opens new avenues to understand plant-microbial  
441 and microbial-microbial interactions in pathogenesis and to develop new approaches for  
442 sustainable management of plant diseases.

443

## 444 **Experimental Procedure**

### 445 **Glasshouse Experiment**

#### 446 **Construction of synthetic community with biocontrol properties against FOV**

447 A glasshouse experiment was performed to test the impact of FOV on cotton plant  
448 performance and associated plant microbiomes, and to examine if the use of biocontrol agents  
449 could resist pathogen impacts on the plant microbiome and pathobiome. We established three  
450 treatments: FOV inoculated (F); FOV plus biocontrol treatment (FB); and a non-treated  
451 control (C). Four widely used cotton cultivars (V1 = CIM 448, V2 = Siokra L23, V3 = CS 50,  
452 V4 = DP 16) and two soil types (clay soil and clay-sandy soil, detailed information described  
453 below) were used in the design with three replicates for each treatment combination.

454 Bacterial biocontrol and FOV isolates were obtained from our laboratory culture collections.  
455 Bacterial strains were previously isolated from the rhizosphere collected from a cotton field  
456 in Narrabri, NSW Australia, and FOV was sourced from our lab collection which was  
457 originally isolated from FOV-infected cotton. FOV was first revived on LB agar at 28 °C for  
458 24 h, before subculturing on new agar plates for antagonistic assay with biocontrol agents.  
459 Taxonomic identity of the seven selected bacterial strains (Table S1) of the synthetic  
460 community, and FOV were characterised by 16S rRNA genes and ribosomal internal  
461 transcribed spacer (ITS) region using primer 27F/1492R (Lane, 1991) and ITS1/ITS2



462 (Ihrmark *et al.*, 2012) by Sanger sequencing at Western Sydney Genomic Facility. Details of  
463 the biocontrol selection were described in the Supplementary File.

#### 464 **Seeds, biocontrol agents and seed treatment**

465 Cotton seeds were first washed with 0.1% HgCl<sub>2</sub> solution in a 50 ml falcon tube to remove  
466 the attached fungi from seed surface, and then washed with distilled water three times to  
467 remove the remaining HgCl<sub>2</sub> (Ramakrishna *et al.*, 1991). Seeds were then washed with 70%  
468 ethanol to remove attached bacteria, followed by washing three times in sterile water to  
469 remove residual ethanol. Each of the washing steps was conducted by hand shaking in 50 ml  
470 falcon tubes for 1 min.

471 Prior to planting, cotton seeds were treated with either sterile distilled water (C and F) or the  
472 consortium of the selected bacterial isolates (FB). For constructing the biocontrol synthetic  
473 community, bacteria were first grown together on an agar plate to test their compatibility.  
474 Selected bacterial strains were then sub-cultured in 100 ml LB broth to exponential growth  
475 phase by estimating the cell density with NanoDrop™ spectrophotometer at OD<sub>600</sub> (OD<sub>600</sub> at  
476 0.5 to 0.6, NanoDrop 2000, Thermal Scientific™). Bacterial cultures were collected by  
477 centrifugation (4000 g, 10 min) and resuspended with sterile water to a final concentration of  
478 approximately  $4 \times 10^7$  CFU/ml. All suspended bacterial strains were mixed at equal  
479 concentration to produce the bacterial synthetic community used in the biocontrol treatments.  
480 Sterilised, dried cotton seeds were immersed either in bacterial synthetic community solution  
481 or distilled water for 30 min on a shaker (50 rpm) at room temperature.

482 Two types of soils were used in this study to provide variation in soil abiotic and biotic  
483 properties. The clay soil was collected from a cotton cultivation farm near Griffith NSW,  
484 Australia (34.16 S, 146.01 E) and the clay-sandy soil (thereafter sandy soil) was collected  
485 from cotton growing area at Western Sydney University farm facility, Richmond NSW,  
486 Australia (33.61 S, 150.74 E). The initial soil physiochemical parameters including nitrate,  
487 nitrite, pH, and soil moisture were measured and described in Table S2. Experimental pots  
488 (25 cm diameter by 30 cm depth) were filled with 3 kg soil. For the establishment of FOV  
489 treatment, FOV was sub-cultured in 200 ml full strength potato dextrose broth for 24 hours.  
490 The conidia produced were quantified with a haemocytometer under a microscope by  
491 averaging five times of counting. FOV conidia were centrifuged at 4000 g for 10 min,  
492 resuspended with sterile water and inoculated into each pot of soil at a final concentration of

493 approximately  $10^7$  CFU per gram of soil before being thoroughly mixed. For uninoculated  
494 control treatments, an equal amount of sterile water was added to the soil.

#### 495 **Experimental conditions and plant performance**

496 Five seeds treated with biocontrol agent were sown in a FOV-inoculated pots, while untreated  
497 seeds were sown in both FOV-inoculated / uninoculated pots. Pots were randomly  
498 distributed in a naturally sun-lit, ambient [CO<sub>2</sub>], glasshouse bay. The temperature was set at  
499 32 °C daytime, 28 °C morning/evening for 2 h, respectively, and 25 °C night-time, which are  
500 typical temperatures of cotton cropping regions in eastern Australia  
501 (<http://www.bom.gov.au/>). Sterilised water was supplied daily to maintain soil moisture  
502 above 70% Water holding capacity (WHC) and fertilisers (Thrive All Purpose Soluble  
503 Fertiliser, Yates) was supplied fortnightly following manufacturer's instructions (see details  
504 in Table S2). Germination data were collected daily for 14 days, plant height data were  
505 collected weekly, and cotton productivity (lint weight) was recorded at final harvest (20  
506 weeks post-sowing). Disease incidence was confirmed by the leaf wilting levels (healthy,  
507 light and severe) and the presence of brown rings in the cross section (Figure S7) by cutting  
508 off cotton stems 10 cm above ground using a stem pruner.

#### 509 **Quantitative PCR analyses of FOV abundance in bulk soil and the rhizosphere**

510 To compare FOV load between samples, qPCR was carried out using FOV-specific primer  
511 pairs Fov-1 (5'-TGTAGGGGTTGTGGGTTTTTTTC-3') and Fov-2 (5'-  
512 CCAACACACAACCGCACACGA-3'), which amplifies a 125-bp DNA fragment  
513 (Zambounis *et al.*, 2007). Total fungi load in soils was quantified using the primer pairs  
514 ITS1f (5'-TCCGTAGGTGAACCTGCGG-3') and 5.8S (5'-CGCTGCGTTCTTCATCG-3 ')  
515 (Fierer *et al.*, 2005). Reactions were performed in duplicate in a LightCycler 480 (Roche)  
516 using 5 µL 2X LightCycler 480 SYBR Green I Master mix, 15 pmol primer mix and 1 µL  
517 template DNA (2.5 ng) in a 10 µL reaction volume. Thermal conditions for both genes  
518 consisted of 5 min at 95 °C for initial denaturation, 40 cycles of 15 s at 95 °C, 20 s at  
519 61 °C (FOV)/53 °C (Fungi) for annealing and 30 s at 72 °C. FOV abundance in soils were  
520 estimated with the formula:

$$X = \frac{(Eff. Fungi)^{Ct(fungi)}}{(Eff. FOV)^{Ct(FOV)}}$$

521 where Eff. (Fungi/FOV) is amplification efficiency for qPCRs, calculated by LinRegPCR 7.5  
522 using raw amplification data for each sample (Ramakers *et al.*, 2003). The Cts (Fungi and  
523 FOV) are threshold cycles, and X represents the percentage of FOV copy numbers existing in  
524 a sample.

### 525 **Rhizosphere and bulk soil sample collection for the glasshouse experiment**

526 For assessing soil microbiome changes by the pathogen infection, bulk and rhizosphere soil  
527 samples were collected at two time points: seedling (approximately two weeks after  
528 germination) and flowering (when more than half of the plants had flowers) stages. Briefly,  
529 approximately 2.5 g of bulk soil from topsoil (0-10 cm) of each pot was collected within a 10  
530 cm radius from the plant stem using a sterilised spatula, and transferred into a 2 ml cryotube.  
531 For rhizosphere soil, one cotton plant from each pot was carefully uprooted from the soil and  
532 gently shaken to remove the excess attached soil, then submerged with TE buffer (10mM  
533 Tris-HCl, 1mM EDTA, pH 8.0) in a 15 ml falcon tube, gently shaking by hand for 30 s to  
534 wash off the rhizosphere soil. Washed plant roots were then transferred into another clean 15  
535 mL falcon tube. The rhizosphere soil was collected by centrifugation at 4000 g for 10 min,  
536 with supernatant discarded. All collected samples were immediately stored at -80 °C until  
537 being processed for DNA extraction.

### 538 **Field sampling**

539 To further investigate microbiome response to FOV infection under field conditions, 112  
540 bulk and rhizosphere soil samples were collected from 11 cotton farms (cultivar: Sicot  
541 BRF71) located in Macquaire Valley, NSW and St George, QLD (see detailed location in  
542 Table S3), which are two of the major cotton-growing regions in Australia where *Fusarium*  
543 wilt is prevalent. Field sampling was done at the flowering stage. At each farm, five healthy  
544 and diseased plants from each field were uprooted and gently shaken to remove the soil  
545 loosely attached to the root. Similar to glasshouse experiment, disease incidence in field  
546 plants were assessed by the presence of brown rings in the cross section of stems. To collect  
547 rhizosphere soil samples, soil tightly attached to the root surface was gently brushed off using  
548 sterile pencil brushes into sterile plastic bags. To collect the bulk soil samples, five cores of  
549 the topsoil (0-20 cm depth) were collected within a radius of 50 cm (1.5 m apart between  
550 cotton plants in the field) from each plant before mixing into a sterile plastic bag. Sampling  
551 within each field was carried out randomly, but the distance between two samples collected  
552 was at least 100 metres. A total number of five samples for each soil compartment (bulk and

553 rhizosphere) were collected in healthy fields, where no disease incidence was reported, and  
554 were labelled as *Fusarium*-free samples (FF). In known diseased farms, five healthy (H) and  
555 five diseased (D) plants were chosen, and samples were collected for bulk and rhizosphere  
556 soil around each plant, as described above. Following the recommended procedure from a  
557 previous study (Qiu *et al.*, 2020), all samples were stored in sterile bags and buried in ice at  
558 the time of sampling and brought to the laboratory. Samples for physiochemical analysis  
559 were stored at 4 °C, and samples for molecular analysis were stored at -80 °C until further  
560 processing. Soil physiochemical parameters were also measured and described in Table S2.

### 561 **DNA extraction and Illumina MiSeq sequencing**

562 DNA was extracted from frozen soil (~250 mg dry weight) using the DNeasy PowerSoil Pro  
563 Kit (Qiagen, Hilden, Germany), following the manufacturer's instructions. Extracted DNA  
564 was quality checked by NanoDrop 2000 (Thermo Fisher Scientific, Waltham, Massachusetts,  
565 USA), quantity checked by Qubit Fluorometer (Thermo Fisher Scientific, USA) and PCR  
566 checked to confirm the amplifiability following a previous study (Qiu *et al.*, 2020).

567 Amplicon sequencing was carried out targeting the V5-V7 region of 16S rRNA gene for  
568 bacterial communities (799F-1193R, Chelius & Triplett, 2001), and ITS2 region (FITS7-  
569 ITS4R, Ihrmark *et al.*, 2012) for fungal communities. Sequencing was performed at Western  
570 Sydney University Next Generation Sequencing (NGS) facility (Richmond, NSW, Australia)  
571 using Illumina MiSeq 2 × 300 bp paired end chemistry. All raw sequence data related to this  
572 study are available in the NCBI Sequence Read Archive (Assession No. PRJNA770816).

### 573 **Microbial community analysis**

#### 574 **Sequences processing**

575 Raw data obtained from the NGS facility were processed using Mothur (v1.41.3) standard  
576 operating procedures (Schloss *et al.*, 2009). Briefly, the forward and reverse sequences were  
577 merged into contigs. Sequences that contained unidentified bases or had greater than 8  
578 homopolymers were filtered out. For bacterial sequences, an additional step aligning  
579 sequences against Silva 16S rRNA gene database version 132 (Pruesse *et al.*, 2007) was  
580 applied, and unaligned sequences were removed. Refined sequences were pre-clustered (diffs  
581 = 1), chimera checked using UCHIME (Edgar *et al.*, 2011) and singleton was removed to  
582 reduce error (Reeder & Knight, 2009). Bacterial and fungal sequences were then  
583 taxonomically classified according to the Silva database version 132 and the UNITE database

584 version 8, respectively, with 60% cut-off confidence. Sequences that match Archaea, cotton  
585 mitochondria and chloroplast in bacterial sequences, Alveolata, Metazoa and host ITS  
586 regions in fungal sequences were removed. Remaining sequences were clustered into  
587 Operational Taxonomic Units (OTUs) at 97% identity and taxonomy was assigned.

### 588 **Statistical analysis and data visualisation**

589 Plant parameters including seed germination, plant height, productivity and disease incidence  
590 were analysed in R using ANOVA and visualised using R package “ggplot2” (Lozupone *et*  
591 *al.*, 2012). Rarefication of OTU matrices into minimum sample depth and rarefaction curves  
592 were conducted using R package “phyloseq”. PERMANOVA was performed using  
593 permutational multivariate analysis of variance (Anderson, Marti J., 2001) in PRIMER v. 6  
594 (PRIMER-E, UK) to compare bacterial and fungal communities under different treatments.  
595 Similarity matrices were calculated based on Bray-Curtis distances on square-root  
596 transformed abundance data to compare the composition and abundances of community  
597 structure. Main analyses used 9,999 permutations of residuals under a reduced model  
598 (Anderson, M. J., 2001). Pair-wise analyses were performed to compare the differences  
599 between treatments with significant interactions based on the main analyses. Alpha and beta  
600 diversity were analysed using R package “phyloseq”, and data visualisation plots were  
601 generated using Principal Coordinates Analysis (PCoA) using R package “ggplot2”. Linear  
602 Discriminant Analysis (LDA) Effective Size (LEfSe) was performed on the Galaxy platform  
603 (<http://huttenhower.sph.harvard.edu/galaxy/>) using one-against-all strategy for multi-class  
604 analysis (Segata *et al.*, 2011). Phylogenetic trees were generated with Mega X using  
605 neighbour-joining method with 1,000 bootstrap before visualised and annotated on iTOL  
606 website (Letunic & Bork, 2021).

### 607 **Identification of core members of microbiomes**

608 To identify the persistent microbial species in cotton soil samples and how these species were  
609 potentially impacted by FOV, we used a core microbiome approach (Astudillo - García *et al.*,  
610 2017) to explore the key members in the cotton rhizosphere microbiome. Briefly, each  
611 treatment group (F, FB, and C) from bulk or rhizosphere soil samples, across two time points,  
612 were extracted from rarefied bacterial and fungal OTU tables. Following the selection criteria  
613 by Hamonts *et al.* (2018), OTUs that were present in >75% of samples of a particular  
614 treatment group were extracted and defined as persistent members of microbiome. Processing  
615 of data from field samples was performed in the same way as described above.

## 616 **Co-occurrence network analysis and pathobiome analysis**

617 To infer the bacterial and fungal associations among the OTUs and compare the difference of  
618 associations among treatment groups, co-occurrence networks of persistent members of  
619 microbiomes were performed using FastSpar (Watts *et al.*, 2019), an implementation of  
620 network analysis using SparCC algorithm (Friedman & Alm, 2012). Fastspar was run using  
621 50 iterations and 1,000 bootstraps to calculate P-values, with statistically significant  
622 correlations ( $P < 0.05$ ) kept for further analysis. Based on the refined datasets, Gephi (0.9.2)  
623 was used to visualise networks using the Fruchterman Reingold layout algorithm (Bastian *et*  
624 *al.*, 2009).

625 To determine the cotton rhizosphere pathobiome, we followed previously reported  
626 approaches (Jakuschkin *et al.*, 2016; Pauvert *et al.*, 2020) using network analysis to subset  
627 significant correlations between pathogen and associated microorganisms at the interkingdom  
628 scale. To investigate the OTUs closely linked with the pathogen as cotton pathobiome,  
629 bacterial and fungal species that correlated with *F. oxysporum* in F and FB treatments were  
630 extracted. To confirm the potential biocontrol properties of the pathobiome members that  
631 were negatively correlated with *F. oxysporum*, a number of rhizosphere microbes were  
632 isolated and characterised from field samples using standard approaches and their activities  
633 were tested against the pathogen using plate assays and planta tests (Liu *et al.*, 2021). OTU  
634 sequences of candidate pathobiome were matched with sequences from isolated microbes  
635 with antagonistic activities against FOV using blastn (McGinnis & Madden, 2004).

636

## 637 **Acknowledgements**

638 Plant microbiome and microbial colonisation work in BKS lab is supported by the Australian  
639 Research Council (DP190103714; DP210102081). Field survey work was carried out as a  
640 part of project funded by Cotton Research and Development Corporation. We thank the  
641 Cotton Info team for their generous help with field survey. JPV thanks to Department of  
642 Biotechnology (DBT), India ref. No BT/IACBGF/04/10/2016 for awarding Indo-Australian Career  
643 Boosting Gold Fellowships (IACBGF Fellowships 2016-17) for research work in WSU.

644

## 645 **Author's contributions**

646 ZQ, JPV and BKS designed the experiment; ZQ, JPV and AP performed the experiment; ZQ,  
647 BKS, HL, JW, and SK collected the samples; ZQ, HL, JW, BDB and CAD analysed the data;  
648 PT, DTT, TW and WC provided the materials; ZQ wrote the manuscript with significant  
649 contribution from BKS, and all co-authors reviewed the manuscript.

650

### 651 **Availability of data and materials**

652 All data are publicly available. All raw sequence data related to this study are available in the  
653 NCBI Sequence Read Archive (Assession No. PRJNA770816).

654

### 655 **References**

- 656 **Ainsworth TD, Krause L, Bridge T, Torda G, Raina J-B, Zakrzewski M, Gates RD, Padilla-Gamiño JL,**  
657 **Spalding HL, Smith C. 2015.** The coral core microbiome identifies rare bacterial taxa as  
658 ubiquitous endosymbionts. *The ISME journal* **9**(10): 2261-2274.
- 659 **Anderson MJ. 2001.** A new method for non-parametric multivariate analysis of variance. *Austral*  
660 *Ecology* **26**(1): 32-46.
- 661 **Anderson MJ. 2001.** Permutation tests for univariate or multivariate analysis of variance and  
662 regression. *Canadian Journal of Fisheries and Aquatic Sciences* **58**(3): 626-639.
- 663 **Araujo R, Dunlap C, Barnett S, Franco CMM. 2019.** Decoding wheat endosphere-rhizosphere  
664 microbiomes in *Rhizoctonia solani* infested soils challenged by *Streptomyces* biocontrol  
665 agents. *Frontiers in plant science* **10**: 1038.
- 666 **Arya N, Rana A, Rajwar A, Sahgal M, Sharma A. 2018.** Biocontrol efficacy of siderophore producing  
667 indigenous *Pseudomonas* strains against *Fusarium* Wilt in Tomato. *National Academy*  
668 *Science Letters* **41**(3): 133-136.
- 669 **Astudillo - García C, Bell JJ, Webster NS, Glasl B, Jompa J, Montoya JM, Taylor MW. 2017.**  
670 Evaluating the core microbiota in complex communities: a systematic investigation.  
671 *Environmental Microbiology* **19**(4): 1450-1462.
- 672 **Babu S, Seetharaman K, Nandakumar R, Johnson I. 2000.** Biocontrol efficacy of *Pseudomonas*  
673 *fluorescens* against *Alternaria solani* and tomato leaf blight disease. *Annals of Plant*  
674 *Protection Sciences* **8**(2): 252-254.
- 675 **Bakker PA, Pieterse CM, de Jonge R, Berendsen RL. 2018.** The soil-borne legacy. *Cell* **172**(6): 1178-  
676 1180.
- 677 **Bass D, Stentiford GD, Wang H-C, Koskella B, Tyler CR. 2019.** The pathobiome in animal and plant  
678 diseases. *Trends in Ecology & Evolution* **34**(11): 996-1008.
- 679 **Bastian M, Heymann S, Jacomy M 2009.** Gephi: an open source software for exploring and  
680 manipulating networks. *Third international AAAI conference on weblogs and social media*.
- 681 **Benson AK, Kelly SA, Legge R, Ma F, Low SJ, Kim J, Zhang M, Oh PL, Nehrenberg D, Hua K, et al.**  
682 **2010.** Individuality in gut microbiota composition is a complex polygenic trait shaped by  
683 multiple environmental and host genetic factors. *Proceedings of the National Academy of*  
684 *Sciences* **107**(44): 18933-18938.



- 685 **Berendsen RL, Vismans G, Yu K, Song Y, de Jonge R, Burgman WP, Burmølle M, Herschend J,**  
686 **Bakker PA, Pieterse CM. 2018.** Disease-induced assemblage of a plant-beneficial bacterial  
687 consortium. *The ISME journal* **12**(6): 1496-1507.
- 688 **Bugbee W. 1970.** Vascular response of cotton to infection by *Fusarium oxysporum* f. sp. *vasinfectum*.  
689 *Phytopathology* **60**(1): 121-123.
- 690 **Cabrera R, García-López H, Aguirre-von-Wobeser E, Orozco-Avitia JA, Gutiérrez-Saldaña AH. 2020.**  
691 Amycolatopsis BX17: an actinobacterial strain isolated from soil of a traditional milpa  
692 agroecosystem with potential biocontrol against *Fusarium graminearum*. *Biological Control*:  
693 104285.
- 694 **Carrión VJ, Perez-Jaramillo J, Cordovez V, Tracanna V, De Hollander M, Ruiz-Buck D, Mendes LW,**  
695 **Van Ijcken WF, Gomez-Exposito R, Elsayed SS. 2019.** Pathogen-induced activation of  
696 disease-suppressive functions in the endophytic root microbiome. *Science* **366**(6465): 606-  
697 612.
- 698 **Chaloner TM, Gurr SJ, Bebber DP. 2021.** Plant pathogen infection risk tracks global crop yields under  
699 climate change. *Nature Climate Change* **11**(8): 710-715.
- 700 **Chelius M, Triplett E. 2001.** The Diversity of Archaea and Bacteria in Association with the Roots of  
701 *Zea mays* L. *Microbial Ecology*: 252-263.
- 702 **Chen H, Wu H, Yan B, Zhao H, Liu F, Zhang H, Sheng Q, Miao F, Liang Z. 2018.** Core microbiome of  
703 medicinal plant *Salvia miltiorrhiza* seed: a rich reservoir of beneficial microbes for secondary  
704 metabolism? *International journal of molecular sciences* **19**(3): 672.
- 705 **Chen S, Zhang M, Wang J, Lv D, Ma Y, Zhou B, Wang B. 2017.** Biocontrol effects of *Brevibacillus*  
706 *laterosporus* AMCC100017 on potato common scab and its impact on rhizosphere bacterial  
707 communities. *Biological Control* **106**: 89-98.
- 708 **Davis R, Colyer P, Rothrock C, Kochman J. 2006.** *Fusarium* wilt of cotton: population diversity and  
709 implications for management. *Plant Disease* **90**(6): 692-703.
- 710 **Davis R, Moore N, Kochman J. 1996.** Characterisation of a population of *Fusarium oxysporum* f. sp.  
711 *vasinfectum* causing wilt of cotton in Australia. *Australian Journal of Agricultural Research*  
712 **47**(7): 1143-1156.
- 713 **de Jesus Sousa JA, Olivares FL. 2016.** Plant growth promotion by streptomycetes: ecophysiology,  
714 mechanisms and applications. *Chemical and Biological Technologies in Agriculture* **3**(1): 1-12.
- 715 **Delgado-Baquerizo M, Guerra CA, Cano-Díaz C, Egidi E, Wang J-T, Eisenhauer N, Singh BK, Maestre**  
716 **FT. 2020.** The proportion of soil-borne pathogens increases with warming at the global scale.  
717 *Nature Climate Change*: 1-5.
- 718 **Develey - Rivière MP, Galiana E. 2007.** Resistance to pathogens and host developmental stage: a  
719 multifaceted relationship within the plant kingdom. *New Phytologist* **175**(3): 405-416.
- 720 **Doonan J, Denman S, Pachebat JA, McDonald JE. 2019.** Genomic analysis of bacteria in the Acute  
721 Oak Decline pathobiome. *Microbial genomics* **5**(1).
- 722 **Edgar RC, Haas BJ, Clemente JC, Quince C, Knight R. 2011.** UCHIME improves sensitivity and speed  
723 of chimera detection. *Bioinformatics* **27**(16): 2194-2200.
- 724 **Elsayed TR, Jacquioud S, Nour EH, Sørensen SJ, Smalla K. 2020.** Biocontrol of bacterial wilt disease  
725 through complex interaction between tomato plant, antagonists, the indigenous rhizosphere  
726 microbiota, and *Ralstonia solanacearum*. *Frontiers in microbiology* **10**: 2835.
- 727 **Erlacher A, Cardinale M, Grosch R, Grube M, Berg G. 2014.** The impact of the pathogen *Rhizoctonia*  
728 *solani* and its beneficial counterpart *Bacillus amyloliquefaciens* on the indigenous lettuce  
729 microbiome. *Frontiers in Microbiology* **5**: 175.
- 730 **Essarioui A, LeBlanc N, Kistler HC, Kinkel LL. 2017.** Plant community richness mediates inhibitory  
731 interactions and resource competition between *Streptomyces* and *Fusarium* populations in  
732 the rhizosphere. *Microbial Ecology* **74**(1): 157-167.
- 733 **Fierer N, Jackson JA, Vilgalys R, Jackson RB. 2005.** Assessment of soil microbial community structure  
734 by use of taxon-specific quantitative PCR assays. *Applied and Environmental Microbiology*  
735 **71**(7): 4117-4120.

- 736 **Friedman J, Alm EJ. 2012.** Inferring correlation networks from genomic survey data. *PLoS Comput*  
737 *Biol* **8**(9): e1002687.
- 738 **Gajbhiye A, Rai AR, Meshram SU, Dongre A. 2010.** Isolation, evaluation and characterization of  
739 *Bacillus subtilis* from cotton rhizospheric soil with biocontrol activity against *Fusarium*  
740 *oxysporum*. *World Journal of Microbiology and Biotechnology* **26**(7): 1187-1194.
- 741 **Göre ME, Caner ÖK, Altın N, Aydın MH, Erdoğan O, Filizer F, Büyükdögerlioğlu A. 2009.** Evaluation  
742 of cotton cultivars for resistance to pathotypes of *Verticillium dahliae*. *Crop Protection* **28**(3):  
743 215-219.
- 744 **Goudjal Y, Zamoum M, Sabaou N, Mathieu F, Zitouni A. 2016.** Potential of endophytic *Streptomyces*  
745 spp. for biocontrol of *Fusarium* root rot disease and growth promotion of tomato seedlings.  
746 *Biocontrol Science and Technology* **26**(12): 1691-1705.
- 747 **Gu Y, Wei Z, Wang X, Friman V-P, Huang J, Wang X, Mei X, Xu Y, Shen Q, Jousset A. 2016.** Pathogen  
748 invasion indirectly changes the composition of soil microbiome via shifts in root exudation  
749 profile. *Biology and Fertility of Soils* **52**(7): 997-1005.
- 750 **Hamonts K, Trivedi P, Garg A, Janitz C, Grinyer J, Holford P, Botha FC, Anderson IC, Singh BK. 2018.**  
751 Field study reveals core plant microbiota and relative importance of their drivers.  
752 *Environmental Microbiology* **20**(1): 124-140.
- 753 **Hoffman MT, Arnold AE. 2010.** Diverse bacteria inhabit living hyphae of phylogenetically diverse  
754 fungal endophytes. *Applied and Environmental Microbiology* **76**(12): 4063-4075.
- 755 **Hollomon DW. 2015.** Fungicide resistance: facing the challenge-a review. *Plant protection science*  
756 **51**(4): 170-176.
- 757 **Hu J, Wei Z, Friman V-P, Gu S-h, Wang X-f, Eisenhauer N, Yang T-j, Ma J, Shen Q-r, Xu Y-c. 2016.**  
758 Probiotic diversity enhances rhizosphere microbiome function and plant disease suppression.  
759 *MBio* **7**(6): e01790-01716.
- 760 **Ihrmark K, Bödeker I, Cruz-Martinez K, Friberg H, Kubartova A, Schenck J, Strid Y, Stenlid J,**  
761 **Brandström-Durling M, Clemmensen KE. 2012.** New primers to amplify the fungal ITS2  
762 region—evaluation by 454-sequencing of artificial and natural communities. *FEMS*  
763 *Microbiology Ecology* **82**(3): 666-677.
- 764 **Jakuschkin B, Fievet V, Schwaller L, Fort T, Robin C, Vacher C. 2016.** Deciphering the pathobiome:  
765 intra-and interkingdom interactions involving the pathogen *Erysiphe alphitoides*. *Microbial*  
766 *Ecology* **72**(4): 870-880.
- 767 **Jangir M, Pathak R, Sharma S, Sharma S. 2018.** Biocontrol mechanisms of *Bacillus* sp., isolated from  
768 tomato rhizosphere, against *Fusarium oxysporum* f. sp. *lycopersici*. *Biological Control* **123**:  
769 60-70.
- 770 **Johnson ET, Bowman MJ, Dunlap CA. 2020.** *Brevibacillus fortis* NRS-1210 produces edeines that  
771 inhibit the in vitro growth of conidia and chlamydospores of the onion pathogen *Fusarium*  
772 *oxysporum* f. sp. *cepae*. *Antonie Van Leeuwenhoek* **113**(7): 973-987.
- 773 **Kaushal M, Swennen R, Mahuku G. 2020.** Unlocking the Microbiome Communities of Banana (*Musa*  
774 spp.) under Disease Stressed (*Fusarium* wilt) and Non-Stressed Conditions. *Microorganisms*  
775 **8**(3): 443.
- 776 **Khan N, Maymon M, Hirsch AM. 2017.** Combating *Fusarium* infection using *Bacillus*-based  
777 antimicrobials. *Microorganisms* **5**(4): 75.
- 778 **Krezalek MA, DeFazio J, Zaborina O, Zaborin A, Alverdy JC. 2016.** The shift of an intestinal  
779 “microbiome” to a “pathobiome” governs the course and outcome of sepsis following  
780 surgical injury. *Shock (Augusta, Ga.)* **45**(5): 475.
- 781 **Kulmatiski A, Beard KH. 2011.** Long-term plant growth legacies overwhelm short-term plant growth  
782 effects on soil microbial community structure. *Soil Biology and Biochemistry* **43**(4): 823-830.
- 783 **Kwak M-J, Kong HG, Choi K, Kwon S-K, Song JY, Lee J, Lee PA, Choi SY, Seo M, Lee HJ. 2018.**  
784 Rhizosphere microbiome structure alters to enable wilt resistance in tomato. *Nature*  
785 *Biotechnology* **36**(11): 1100-1109.

- 786 **Lamb EG, Kennedy N, Siciliano SD. 2011.** Effects of plant species richness and evenness on soil  
787 microbial community diversity and function. *Plant and Soil* **338**(1-2): 483-495.
- 788 **Lane D. 1991.** 16S/23S rRNA sequencing. *Nucleic acid techniques in bacterial systematics*: 115-175.
- 789 **Lay C-Y, Bell TH, Hamel C, Harker KN, Mohr R, Greer CW, Yergeau É, St-Arnaud M. 2018.** Canola  
790 root-associated microbiomes in the Canadian Prairies. *Frontiers in microbiology* **9**: 1188.
- 791 **Lemanceau P, Blouin M, Muller D, Moëgne-Loccoz Y. 2017.** Let the core microbiota be functional.  
792 *Trends in Plant Science* **22**(7): 583-595.
- 793 **Leoni C, Piancone E, Sasanelli N, Bruno GL, Manzari C, Pesole G, Ceci LR, Volpicella M. 2020.** Plant  
794 Health and Rhizosphere Microbiome: Effects of the Bionematicide *Aphanocladium album* in  
795 Tomato Plants Infested by *Meloidogyne javanica*. *Microorganisms* **8**(12): 1922.
- 796 **Letunic I, Bork P. 2021.** Interactive Tree Of Life (iTOL) v5: an online tool for phylogenetic tree display  
797 and annotation. *Nucleic Acids Research* **49**(W1): W293-W296.
- 798 **Liu H, Brettell LE, Qiu Z, Singh BK. 2020.** Microbiome-mediated stress resistance in plants. *Trends in*  
799 *Plant Science*.
- 800 **Liu H, Li J, Carvalhais LC, Percy CD, Prakash Verma J, Schenk PM, Singh BK. 2021a.** Evidence for the  
801 plant recruitment of beneficial microbes to suppress soil - borne pathogens. *New*  
802 *Phytologist* **229**(5): 2873-2885.
- 803 **Liu H, Qiu Z, Ye J, Verma JP, Li J, Singh BK. 2021b.** Effective colonisation by a bacterial synthetic  
804 community promotes plant growth and alters soil microbial community. *Journal of*  
805 *Sustainable Agriculture and Environment*.
- 806 **Lozupone CA, Stombaugh JI, Gordon JI, Jansson JK, Knight R. 2012.** Diversity, stability and resilience  
807 of the human gut microbiota. *Nature* **489**(7415): 220-230.
- 808 **Lucas JA, Hawkins NJ, Fraaije BA. 2015.** The evolution of fungicide resistance. *Advances in Applied*  
809 *Microbiology* **90**: 29-92.
- 810 **McGinnis S, Madden TL. 2004.** BLAST: at the core of a powerful and diverse set of sequence analysis  
811 tools. *Nucleic Acids Research* **32**(suppl\_2): W20-W25.
- 812 **Misk A, Franco C. 2011.** Biocontrol of chickpea root rot using endophytic actinobacteria. *BioControl*  
813 **56**(5): 811-822.
- 814 **Padda KP, Puri A, Chanway CP. 2017.** *Paenibacillus polymyxa*: A prominent biofertilizer and  
815 biocontrol agent for sustainable agriculture. *Agriculturally important microbes for*  
816 *sustainable agriculture*: Springer, 165-191.
- 817 **Palaniyandi SA, Yang SH, Zhang L, Suh J-W. 2013.** Effects of actinobacteria on plant disease  
818 suppression and growth promotion. *Applied Microbiology and Biotechnology* **97**(22): 9621-  
819 9636.
- 820 **Pauvert C, Fort T, Calonnec A, d’Arcier JF, Chancerel E, Massot M, Chiquet J, Robin S, Bohan DA,**  
821 **Vallance J. 2020.** Microbial association networks give relevant insights into plant  
822 pathobiomes. *bioRxiv*.
- 823 **Pruesse E, Quast C, Knittel K, Fuchs BM, Ludwig W, Peplies J, Glöckner FO. 2007.** SILVA: a  
824 comprehensive online resource for quality checked and aligned ribosomal RNA sequence  
825 data compatible with ARB. *Nucleic Acids Research* **35**.
- 826 **Qiu Z, Egidio E, Liu H, Kaur S, Singh BK. 2019.** New frontiers in agriculture productivity: Optimised  
827 microbial inoculants and in situ microbiome engineering. *Biotechnology Advances*.
- 828 **Qiu Z, Wang J, Delgado-Baquerizo M, Trivedi P, Egidio E, Chen Y-M, Zhang H, Singh BK. 2020.** Plant  
829 microbiomes: do different preservation approaches and primer sets alter our capacity to  
830 assess microbial diversity and community composition? *Frontiers in plant science* **11**: 993.
- 831 **Ramakers C, Ruijter JM, Deprez RHL, Moorman AF. 2003.** Assumption-free analysis of quantitative  
832 real-time polymerase chain reaction (PCR) data. *Neuroscience Letters* **339**(1): 62-66.
- 833 **Ramakrishna N, Lacey J, Smith J. 1991.** Effect of surface sterilization, fumigation and gamma  
834 irradiation on the microflora and germination of barley seeds. *International Journal of Food*  
835 *Microbiology* **13**(1): 47-54.
- 836 **Reeder J, Knight R. 2009.** The 'rare biosphere': a reality check. *Nature Methods* **6**(9): 636-637.

- 837 **Rybakova D, Mancinelli R, Wikström M, Birch-Jensen A-S, Postma J, Ehlers R-U, Goertz S, Berg G.**  
838 **2017.** The structure of the Brassica napus seed microbiome is cultivar-dependent and affects  
839 the interactions of symbionts and pathogens. *Microbiome* **5**(1): 104.
- 840 **Saravanakumar K, Li Y, Yu C, Wang Q-q, Wang M, Sun J, Gao J-x, Chen J.** **2017.** Effect of  
841 *Trichoderma harzianum* on maize rhizosphere microbiome and biocontrol of Fusarium Stalk  
842 rot. *Scientific reports* **7**(1): 1-13.
- 843 **Schlatter D, Kinkel L, Thomashow L, Weller D, Paulitz T.** **2017.** Disease suppressive soils: new  
844 insights from the soil microbiome. *Phytopathology* **107**(11): 1284-1297.
- 845 **Schlatter DC, Yin C, Hulbert S, Paulitz TC.** **2020.** Core rhizosphere microbiomes of dryland wheat are  
846 influenced by location and land use history. *Applied and Environmental Microbiology* **86**(5).
- 847 **Schloss PD, Westcott SL, Ryabin T, Hall JR, Hartmann M, Hollister EB, Lesniewski RA, Oakley BB,**  
848 **Parks DH, Robinson CJ, et al.** **2009.** Introducing mothur: Open-Source, Platform-  
849 Independent, Community-Supported Software for Describing and Comparing Microbial  
850 Communities. *Applied and Environmental Microbiology* **75**(23): 7537-7541.
- 851 **Segata N, Izard J, Waldron L, Gevers D, Miropolsky L, Garrett WS, Huttenhower C.** **2011.**  
852 Metagenomic biomarker discovery and explanation. *Genome biology* **12**(6): 1-18.
- 853 **Shade A, Handelsman J.** **2012.** Beyond the Venn diagram: the hunt for a core microbiome.  
854 *Environmental Microbiology* **14**(1): 4-12.
- 855 **Shen Z, Penton CR, Lv N, Xue C, Yuan X, Ruan Y, Li R, Shen Q.** **2018.** Banana Fusarium Wilt Disease  
856 Incidence Is Influenced by Shifts of Soil Microbial Communities Under Different Monoculture  
857 Spans. *Microbial Ecology* **75**(3): 739-750.
- 858 **Singh BK, Trivedi P, Egidi E, Macdonald CA, Delgado-Baquerizo M.** **2020.** Crop microbiome and  
859 sustainable agriculture. *Nature Reviews Microbiology* **18**(11): 601-602.
- 860 **Sun D, Zhuo T, Hu X, Fan X, Zou H.** **2017.** Identification of a *Pseudomonas putida* as biocontrol agent  
861 for tomato bacterial wilt disease. *Biological Control* **114**: 45-50.
- 862 **Sweet M, Burian A, Fifer J, Bulling M, Elliott D, Raymundo L.** **2019.** Compositional homogeneity in  
863 the pathobiome of a new, slow-spreading coral disease. *Microbiome* **7**(1): 1-14.
- 864 **Sweet MJ, Bulling MT.** **2017.** On the importance of the microbiome and pathobiome in coral health  
865 and disease. *Frontiers in Marine Science* **4**: 9.
- 866 **Szczech M, Shoda M.** **2006.** The Effect of mode of application of *Bacillus subtilis* RB14 - C on its  
867 efficacy as a biocontrol agent against *Rhizoctonia solani*. *Journal of Phytopathology* **154**(6):  
868 370-377.
- 869 **Thomas T, Moitinho-Silva L, Lurgi M, Björk JR, Easson C, Astudillo-García C, Olson JB, Erwin PM,**  
870 **López-Legentil S, Luter H.** **2016.** Diversity, structure and convergent evolution of the global  
871 sponge microbiome. *Nature communications* **7**(1): 1-12.
- 872 **Trivedi P, Delgado - Baquerizo M, Jeffries TC, Trivedi C, Anderson IC, Lai K, McNee M, Flower K, Pal**  
873 **Singh B, Minkey D.** **2017a.** Soil aggregation and associated microbial communities modify  
874 the impact of agricultural management on carbon content. *Environmental Microbiology*  
875 **19**(8): 3070-3086.
- 876 **Trivedi P, Leach JE, Tringe SG, Sa T, Singh BK.** **2020.** Plant–microbiome interactions: from  
877 community assembly to plant health. *Nature Reviews Microbiology* **18**(11): 607-621.
- 878 **Trivedi P, Schenk PM, Wallenstein MD, Singh BK.** **2017b.** Tiny microbes, big yields: enhancing food  
879 crop production with biological solutions. *Microbial biotechnology* **10**(5): 999-1003.
- 880 **Tufts DM, Sameroff S, Tagliaferro T, Jain K, Oleynik A, VanAcker MC, Diuk-Wasser MA, Lipkin WI,**  
881 **Tokarz R.** **2020.** A metagenomic examination of the pathobiome of the invasive tick species,  
882 *Haemaphysalis longicornis*, collected from a New York City borough, USA. *Ticks and Tick-*  
883 *borne Diseases* **11**(6): 101516.
- 884 **Turnbaugh PJ, Ley RE, Hamady M, Fraser-Liggett CM, Knight R, Gordon JI.** **2007.** The Human  
885 Microbiome Project. *Nature* **449**(7164): 804-810.

- 886 **Ulloa M, Hutmacher RB, Schramm T, Ellis ML, Nichols R, Roberts PA, Wright SD. 2020.** Sources,  
887 selection and breeding of Fusarium wilt (*Fusarium oxysporum* f. sp. *vasinfectum*) race 4  
888 (FOV4) resistance in Upland (*Gossypium hirsutum* L.) cotton. *Euphytica* **216**(7): 1-18.
- 889 **Vandenkoornhuysen P, Quaiser A, Duhamel M, Le Van A, Dufresne A. 2015.** The importance of the  
890 microbiome of the plant holobiont. *New Phytologist* **206**(4): 1196-1206.
- 891 **Vayssier-Taussat M, Albina E, Citti C, Cosson JF, Jacques M-A, Lebrun M-H, Le Loir Y, Ogliaastro M,  
892 Petit M-A, Roumagnac P. 2014.** Shifting the paradigm from pathogens to pathobiome: new  
893 concepts in the light of meta-omics. *Frontiers in cellular and infection microbiology* **4**: 29.
- 894 **Wachowska U, Irzykowski W, Jędrzycka M, Stasiulewicz-Paluch AD, Głowacka K. 2013.** Biological  
895 control of winter wheat pathogens with the use of antagonistic *Sphingomonas* bacteria  
896 under greenhouse conditions. *Biocontrol Science and Technology* **23**(10): 1110-1122.
- 897 **Wang T, Hao Y, Zhu M, Yu S, Ran W, Xue C, Ling N, Shen Q. 2019.** Characterizing differences in  
898 microbial community composition and function between Fusarium wilt diseased and healthy  
899 soils under watermelon cultivation. *Plant and Soil* **438**(1): 421-433.
- 900 **Watts SC, Ritchie SC, Inouye M, Holt KE. 2019.** FastSpar: rapid and scalable correlation estimation  
901 for compositional data. *Bioinformatics* **35**(6): 1064-1066.
- 902 **Wei Z, Gu Y, Friman V-P, Kowalchuk GA, Xu Y, Shen Q, Jousset A. 2019.** Initial soil microbiome  
903 composition and functioning predetermine future plant health. *Science advances* **5**(9):  
904 eaaw0759.
- 905 **Wei Z, Hu J, Yin S, Xu Y, Jousset A, Shen Q, Friman V-P. 2018.** *Ralstonia solanacearum* pathogen  
906 disrupts bacterial rhizosphere microbiome during an invasion. *Soil Biology and Biochemistry*  
907 **118**: 8-17.
- 908 **Wei Z, Yang T, Friman V-P, Xu Y, Shen Q, Jousset A. 2015.** Trophic network architecture of root-  
909 associated bacterial communities determines pathogen invasion and plant health. *Nature*  
910 *communications* **6**(1): 1-9.
- 911 **Xiong C, He JZ, Singh BK, Zhu YG, Wang JT, Li PP, Zhang QB, Han LL, Shen JP, Ge AH. 2021a.** Rare  
912 taxa maintain the stability of crop mycobiomes and ecosystem functions. *Environmental*  
913 *Microbiology* **23**(4): 1907-1924.
- 914 **Xiong C, Zhu YG, Wang JT, Singh B, Han LL, Shen JP, Li PP, Wang GB, Wu CF, Ge AH. 2021b.** Host  
915 selection shapes crop microbiome assembly and network complexity. *New Phytologist*  
916 **229**(2): 1091-1104.
- 917 **Xu J, Zhang Y, Zhang P, Trivedi P, Riera N, Wang Y, Liu X, Fan G, Tang J, Coletta-Filho HD. 2018.** The  
918 structure and function of the global citrus rhizosphere microbiome. *Nature communications*  
919 **9**(1): 1-10.
- 920 **Yang L, Xie J, Jiang D, Fu Y, Li G, Lin F. 2008.** Antifungal substances produced by *Penicillium oxalicum*  
921 strain PY-1—potential antibiotics against plant pathogenic fungi. *World Journal of*  
922 *Microbiology and Biotechnology* **24**(7): 909-915.
- 923 **Zambounis A, Paplomatas E, Tsafaris A. 2007.** Intergenic spacer-RFLP analysis and direct  
924 quantification of Australian *Fusarium oxysporum* f. sp. *vasinfectum* isolates from soil and  
925 infected cotton tissues. *Plant Disease* **91**(12): 1564-1573.

926

927

928 **Figure captions**

929 **Figure 1.** Principal Coordinates Analysis (PCoA) plot using Bray-Curtis distance matrix on  
930 bacterial (A & B) and fungal (C & D) communities in different soil types (A & C: clay soil, B  
931 & D: clay-sandy soil). C = control treatment (light blue), F = FOV treatment (light red), FB =  
932 FOV + biocontrol treatment (light green). Solid circles indicate samples at seedling stage, and  
933 open circles indicate samples at flowing stage. Ellipses represent 95% confidence interval.

934

935 **Figure 2.** Cladogram of bacterial (A & B) and fungal (C & D) communities based on LEfSe  
936 analysis (LDA effect size cutoff = 3.0) in glasshouse (A & C) and field (B & D) samples.  
937 Microbial markers at different taxonomic levels are highlighted with colours based on  
938 treatments or plant phenotypes: C = control treatment (light blue), F = FOV treatment (light  
939 red), FB = FOV + biocontrol treatment (light green), D = diseased plants in diseased field  
940 (red), H = healthy plants in diseased field (green), FF = healthy plants in FOV-free field  
941 (navy). Notably, there was no bacterial indicator found (LDA effect size  $\geq 3.0$ ) in H group in  
942 field samples (B).

943

944 **Figure 3.** Bacterial core OTUs in glasshouse (A) and field (B) samples. Phylogenetic trees  
945 were constructed using maximum likelihood method based on 16S rRNA gene V5-V7 region  
946 (799F-1193R). The outer strips indicate relative abundances of each OTU under different  
947 groups, and the inner coloured strip indicate bacterial phyla of the OTUs.

948

949 **Figure 4.** Universal core bacterial genera with inclusive OTUs present across both  
950 glasshouse and field samples. Phylogenetic trees were constructed using maximum likelihood  
951 method based on 16S rRNA gene V5-V7 region (799F-1193R). Core OTUs presented in  
952 glasshouse samples are labelled with green blocks, and core OTUs presented in field samples  
953 were labelled with brown blocks.

954

955 **Figure 5.** Co-occurrence network analysis of bacterial and fungal communities in glasshouse  
956 (A) and field (B) samples in different groups. Colours of nodes indicate bacterial (blue) and  
957 fungal (olive) OTUs, and colours of edges indicate positive (green) and negative (red)

958 correlations. The size of nodes indicates the weight of the corresponding OTU (numbers of  
959 edges connected), and the weight of the edges indicates the degree of the correlation.

960

961 **Figure 6.** Pathobiome based on spearman correlations between *Fusarium oxysporum* and  
962 other microbial taxa in glasshouse (A) and field (B) samples. Nodes only with strong  
963 correlation ( $P < 0.01$ ,  $|r| \geq 0.6$ ) are shown. Colours of nodes indicate the microbial phyla,  
964 and colours of edges indicate positive (green) and negative (red) correlations. Microbial  
965 OTUs consistently present in both glasshouse and field samples are highlighted with red.

966

967 **Figure S1.** Plant data of glasshouse experiment including germination, plant height,  
968 productivity and disease incidence throughout the experiment period. C = control treatment  
969 (light blue), F = FOV treatment (light red), FB = FOV + biocontrol treatment (light green).  
970 There was no significant difference found among different treatments in germination, plant  
971 height or productivity.

972

973 **Figure S2.** qPCR quantifying FOV load in bulk and the rhizosphere samples. soil.C = bulk  
974 soil control (teal), soil.F = bulk soil FOV (yellow), rhizo.C = rhizosphere control treatment  
975 (light blue), rhizo.F = rhizosphere FOV treatment (light red), rhizo.FB = rhizosphere FOV +  
976 biocontrol treatment (light green).

977

978 **Figure S3.** Rarefaction curve for the sequences of soil microbiomes obtained from bacterial  
979 16S rRNA gene sequencing (A) and fungal ITS region sequencing (B) in glasshouse, as well  
980 as bacterial 16S rRNA gene sequencing (C) and fungal ITS region sequencing (D) in field  
981 samples.

982

983 **Figure S4.** Principal Coordinates Analysis (PCoA) plot using Bray-Curtis distance matrix on  
984 (A) glasshouse and (B) field samples. Microbial communities in bulk soils (yellow) are  
985 different from rhizosphere samples (blue). In glasshouse samples, distinct differences were  
986 also found between clay soil (circles) and clay-sandy soil (triangles). In field samples, no  
987 significant differences were found in bulk soil (C) between healthy (cyan) and diseased (red)



988 fields, but differences were found in rhizosphere soil (D) between fusarium-free plant (blue)  
989 and other plants (diseased: red, healthy: green) in diseased fields. Shapes in (C) and (D)  
990 indicate different locations (circles: Macquarie, triangles: St George).

991

992 **Figure S5.** Alpha diversity (Chao1, Shannon and Simpson) indices of bacterial (A & C) and  
993 fungal (B & D) communities from glasshouse (A & B) and field (C & D) samples. C =  
994 control treatment (light blue), F = FOV treatment (light red), FB = FOV + biocontrol  
995 treatment (light green), D = diseased plants in diseased field (red), H = healthy plants in  
996 diseased field (green), FF = healthy plants in FOV-free field (navy).

997

998

# Clay soil

# Clay-sandy soil

## Bacteria

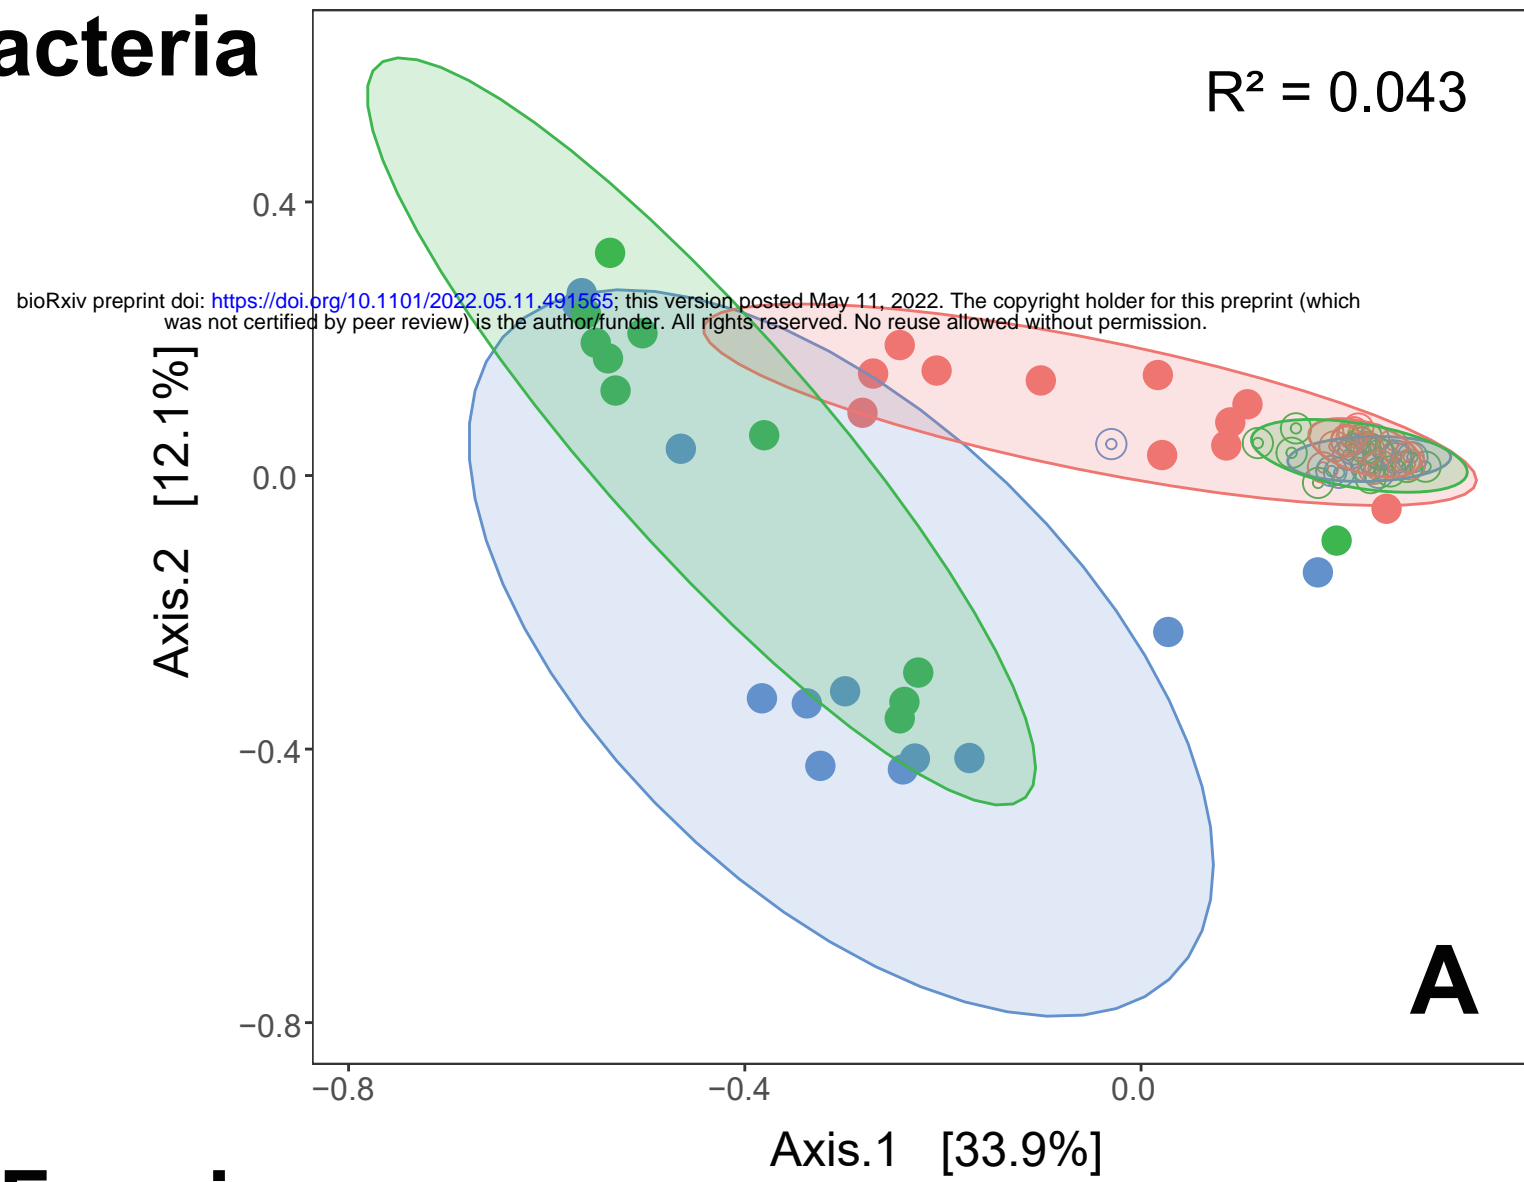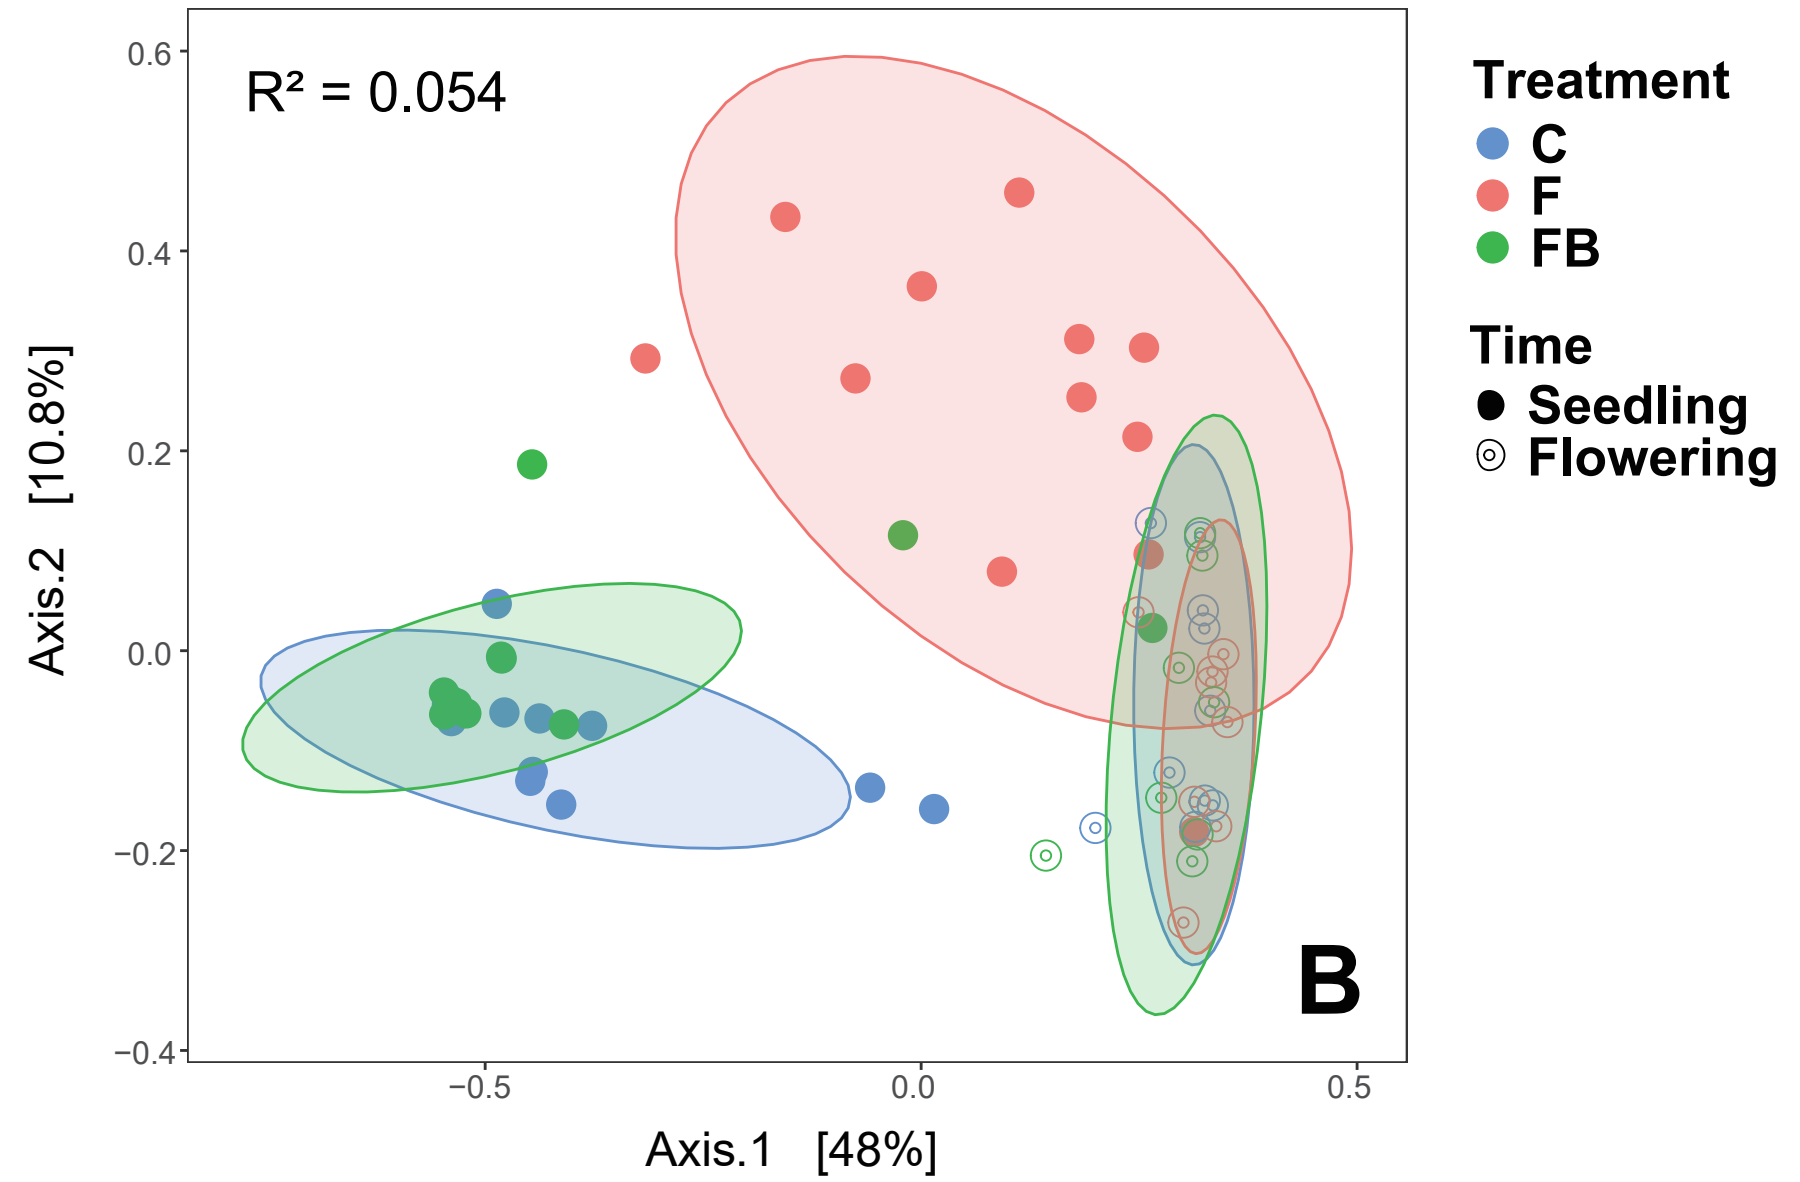

## Fungi

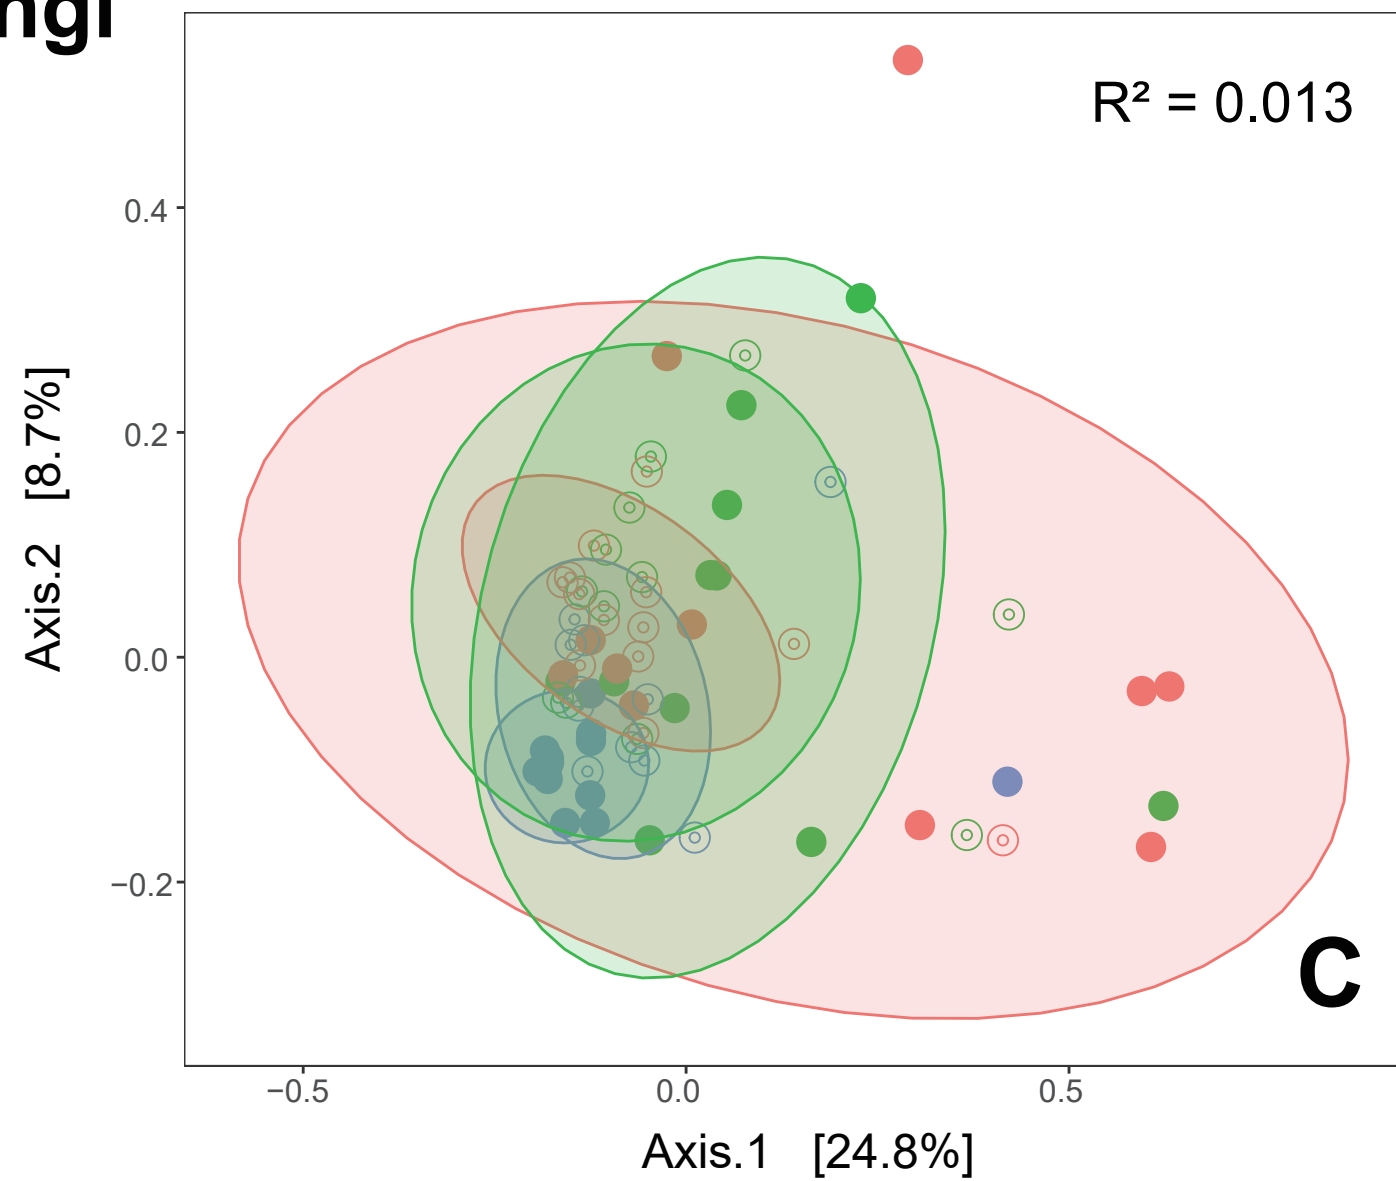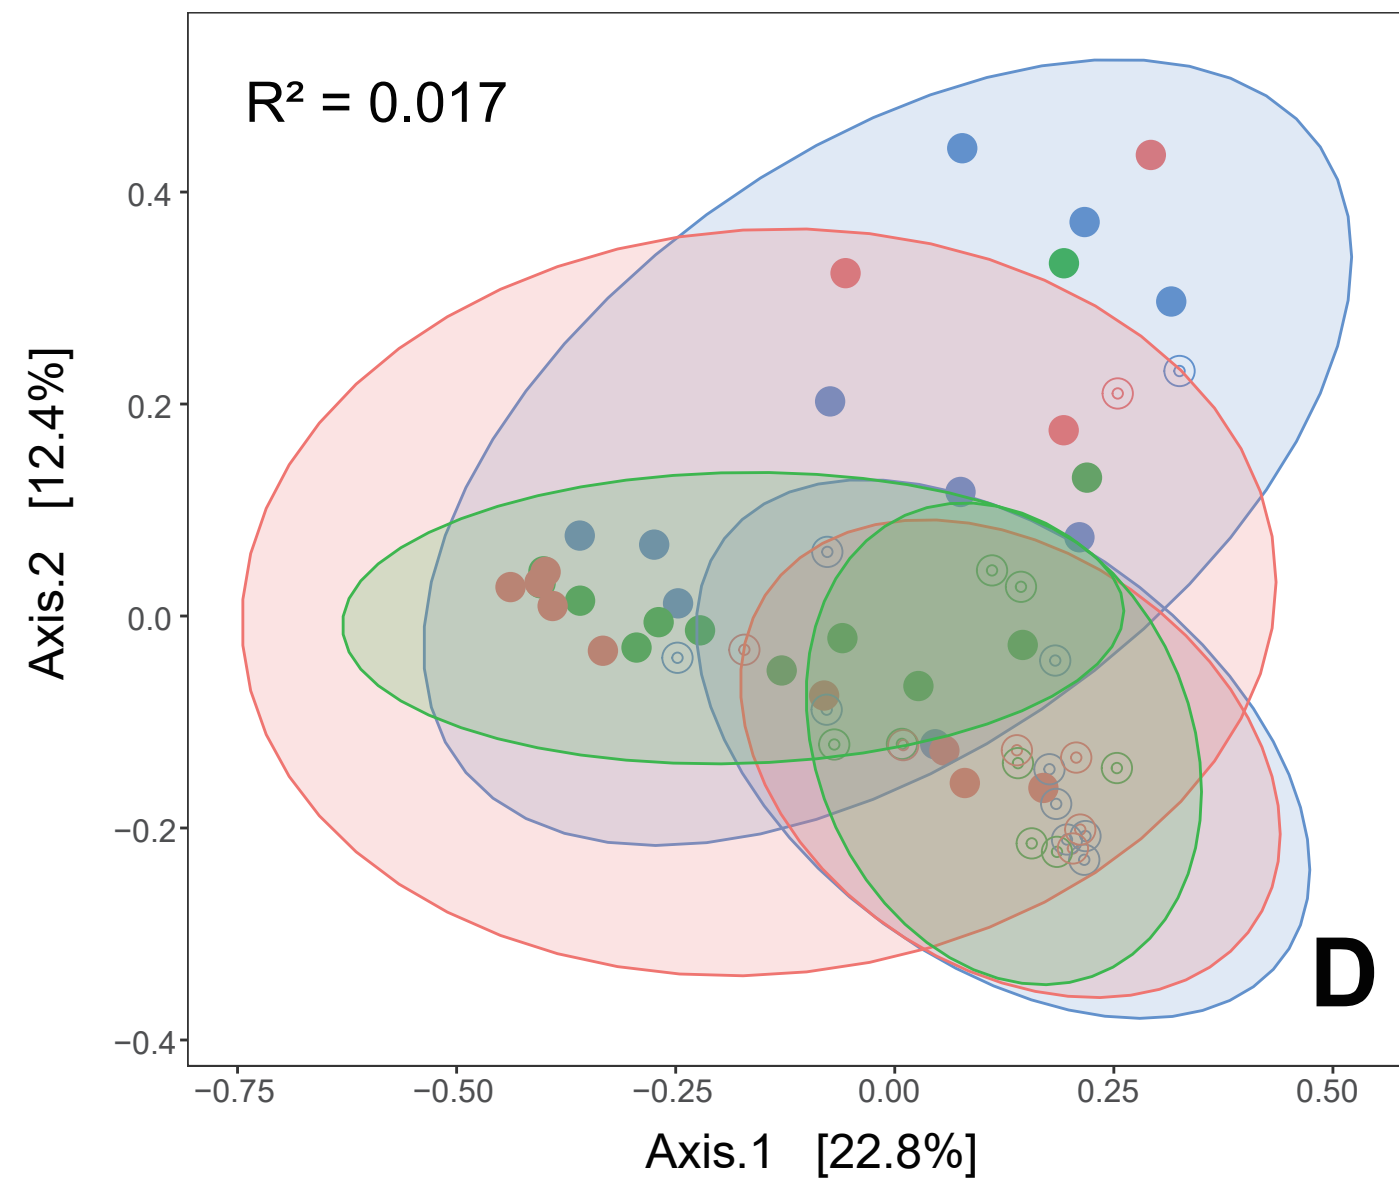

**A**

C  
F  
FB

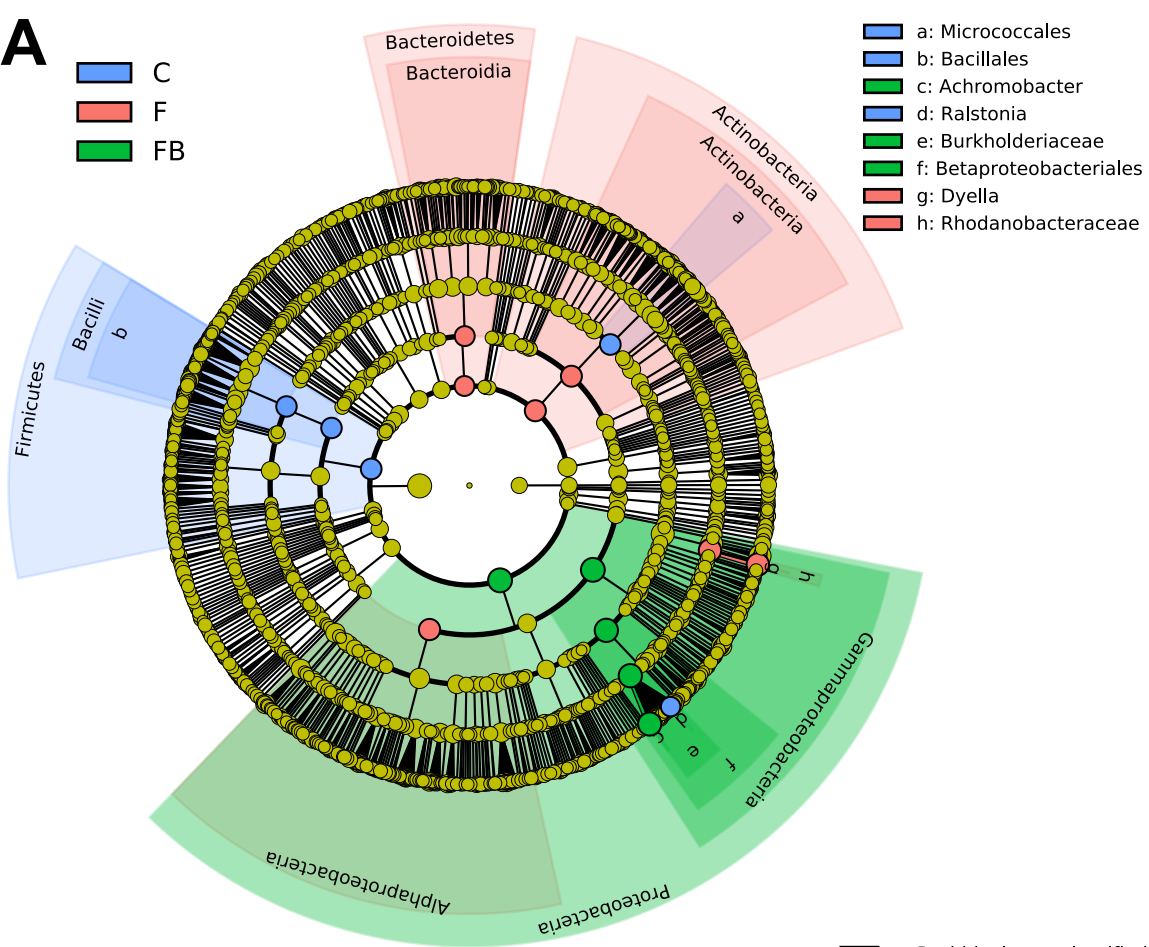**B**

D  
FF

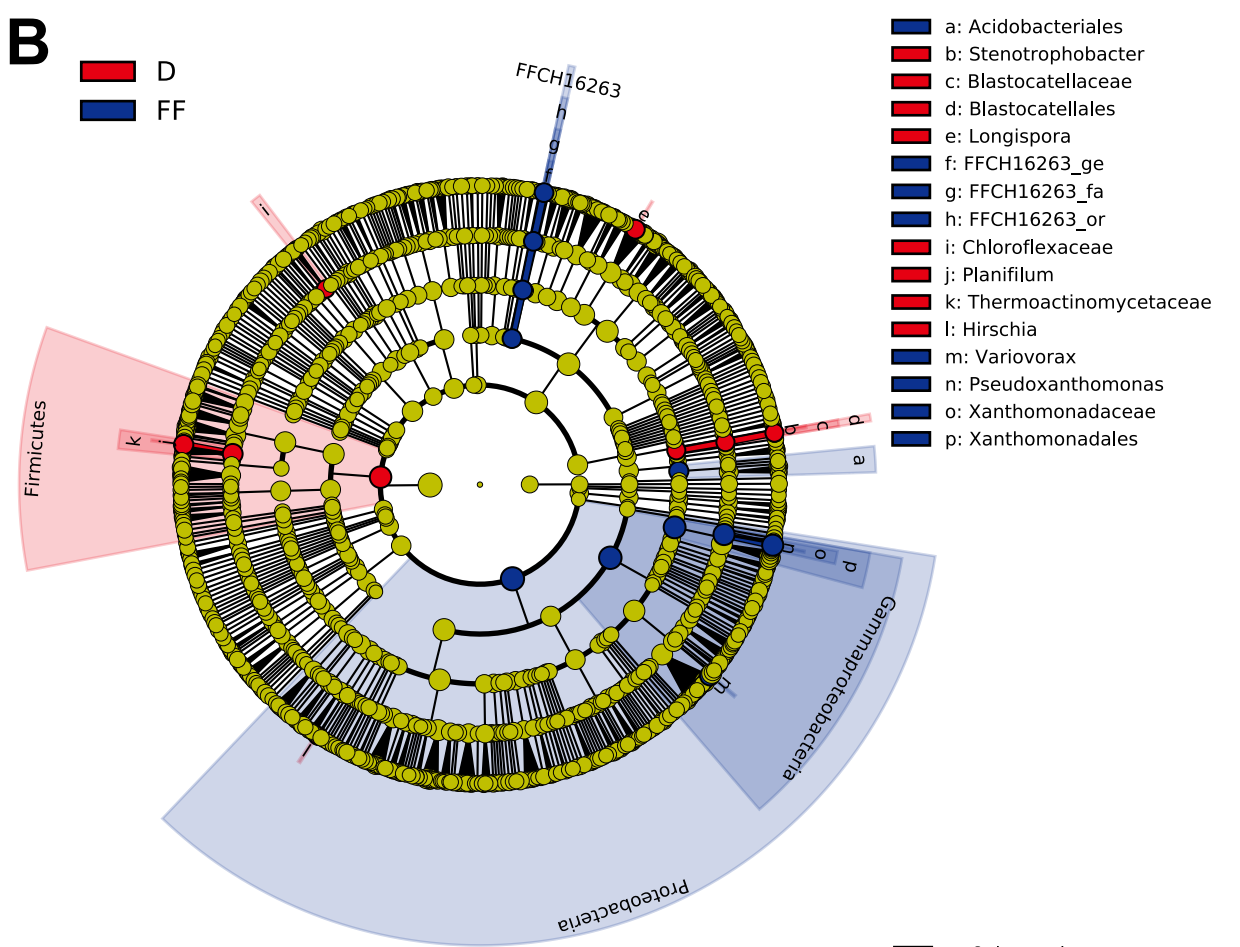**C**

C  
F  
FB

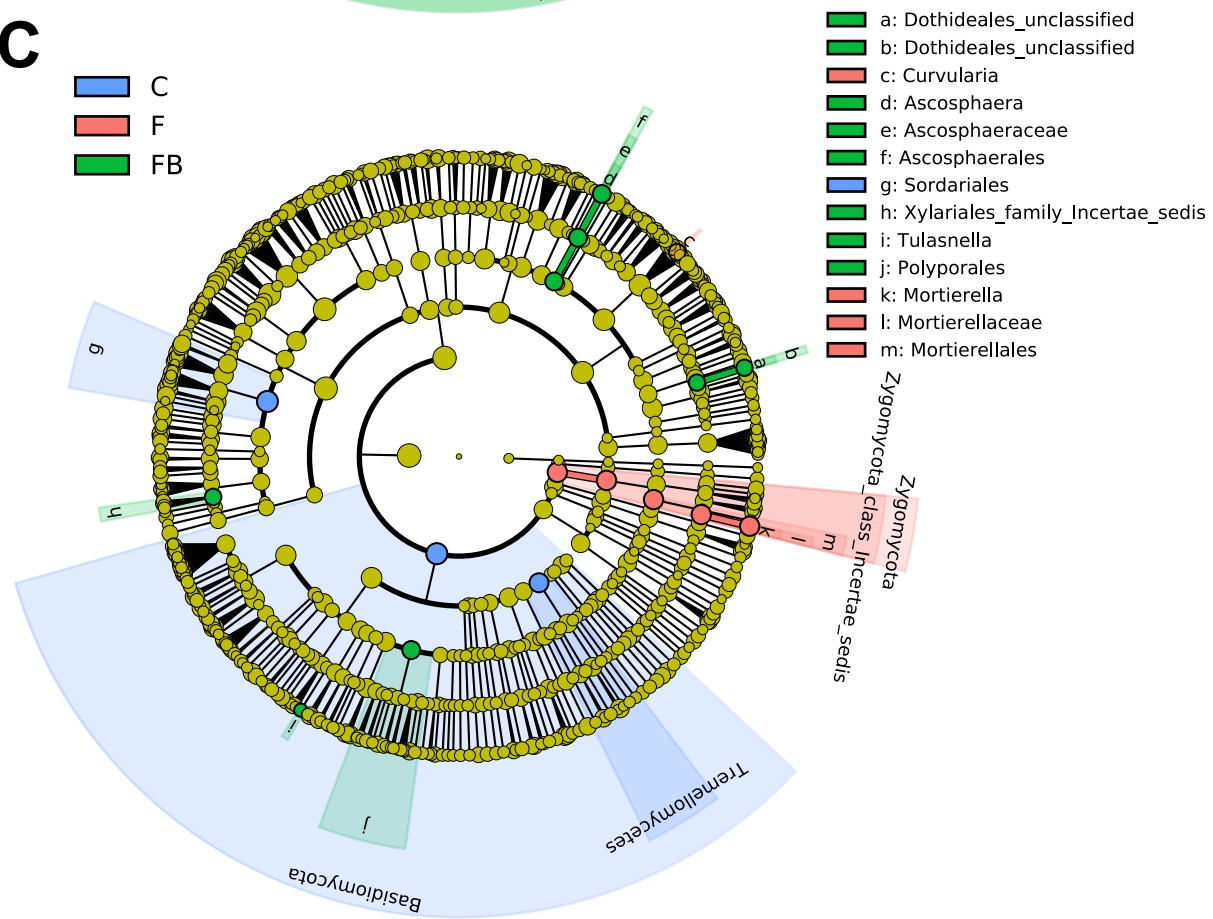**D**

D  
FF  
H

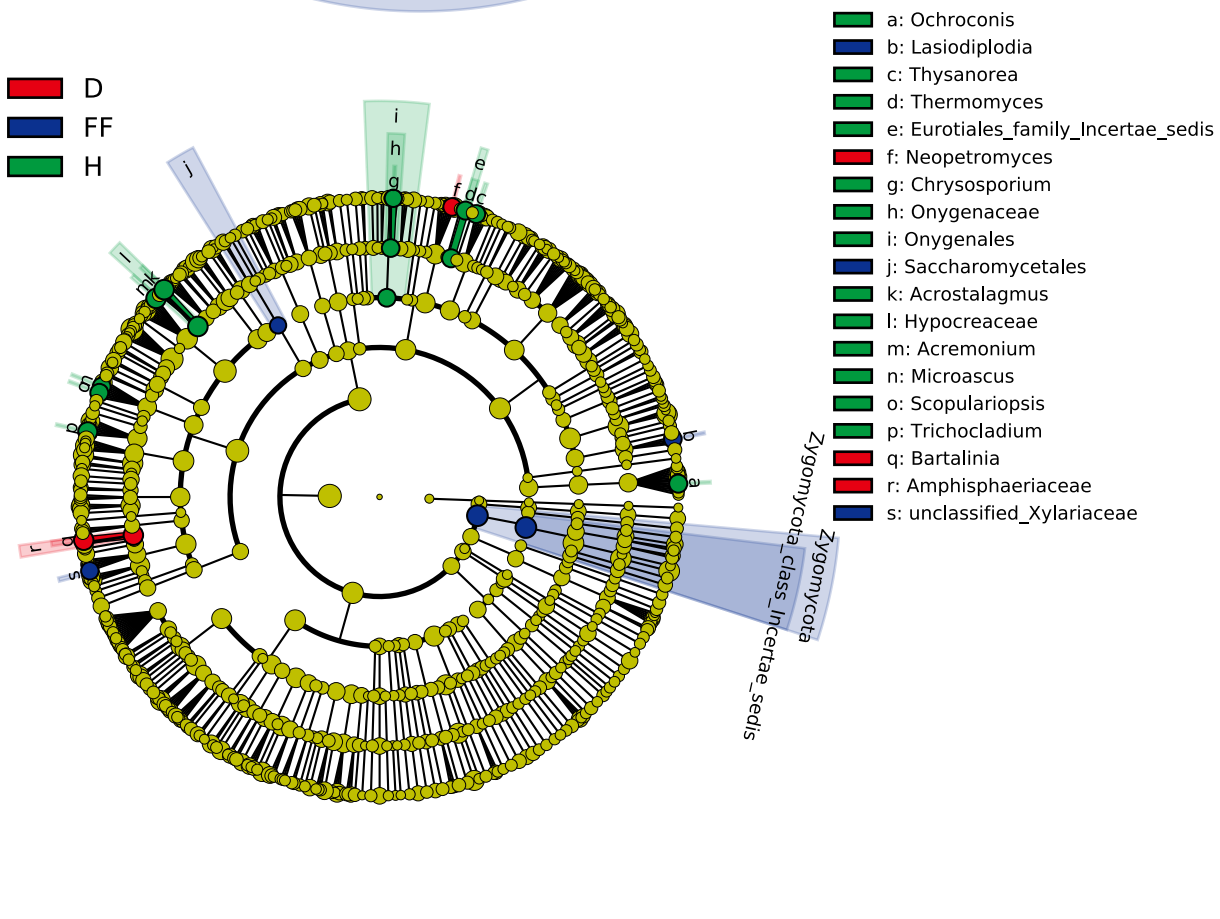



**A**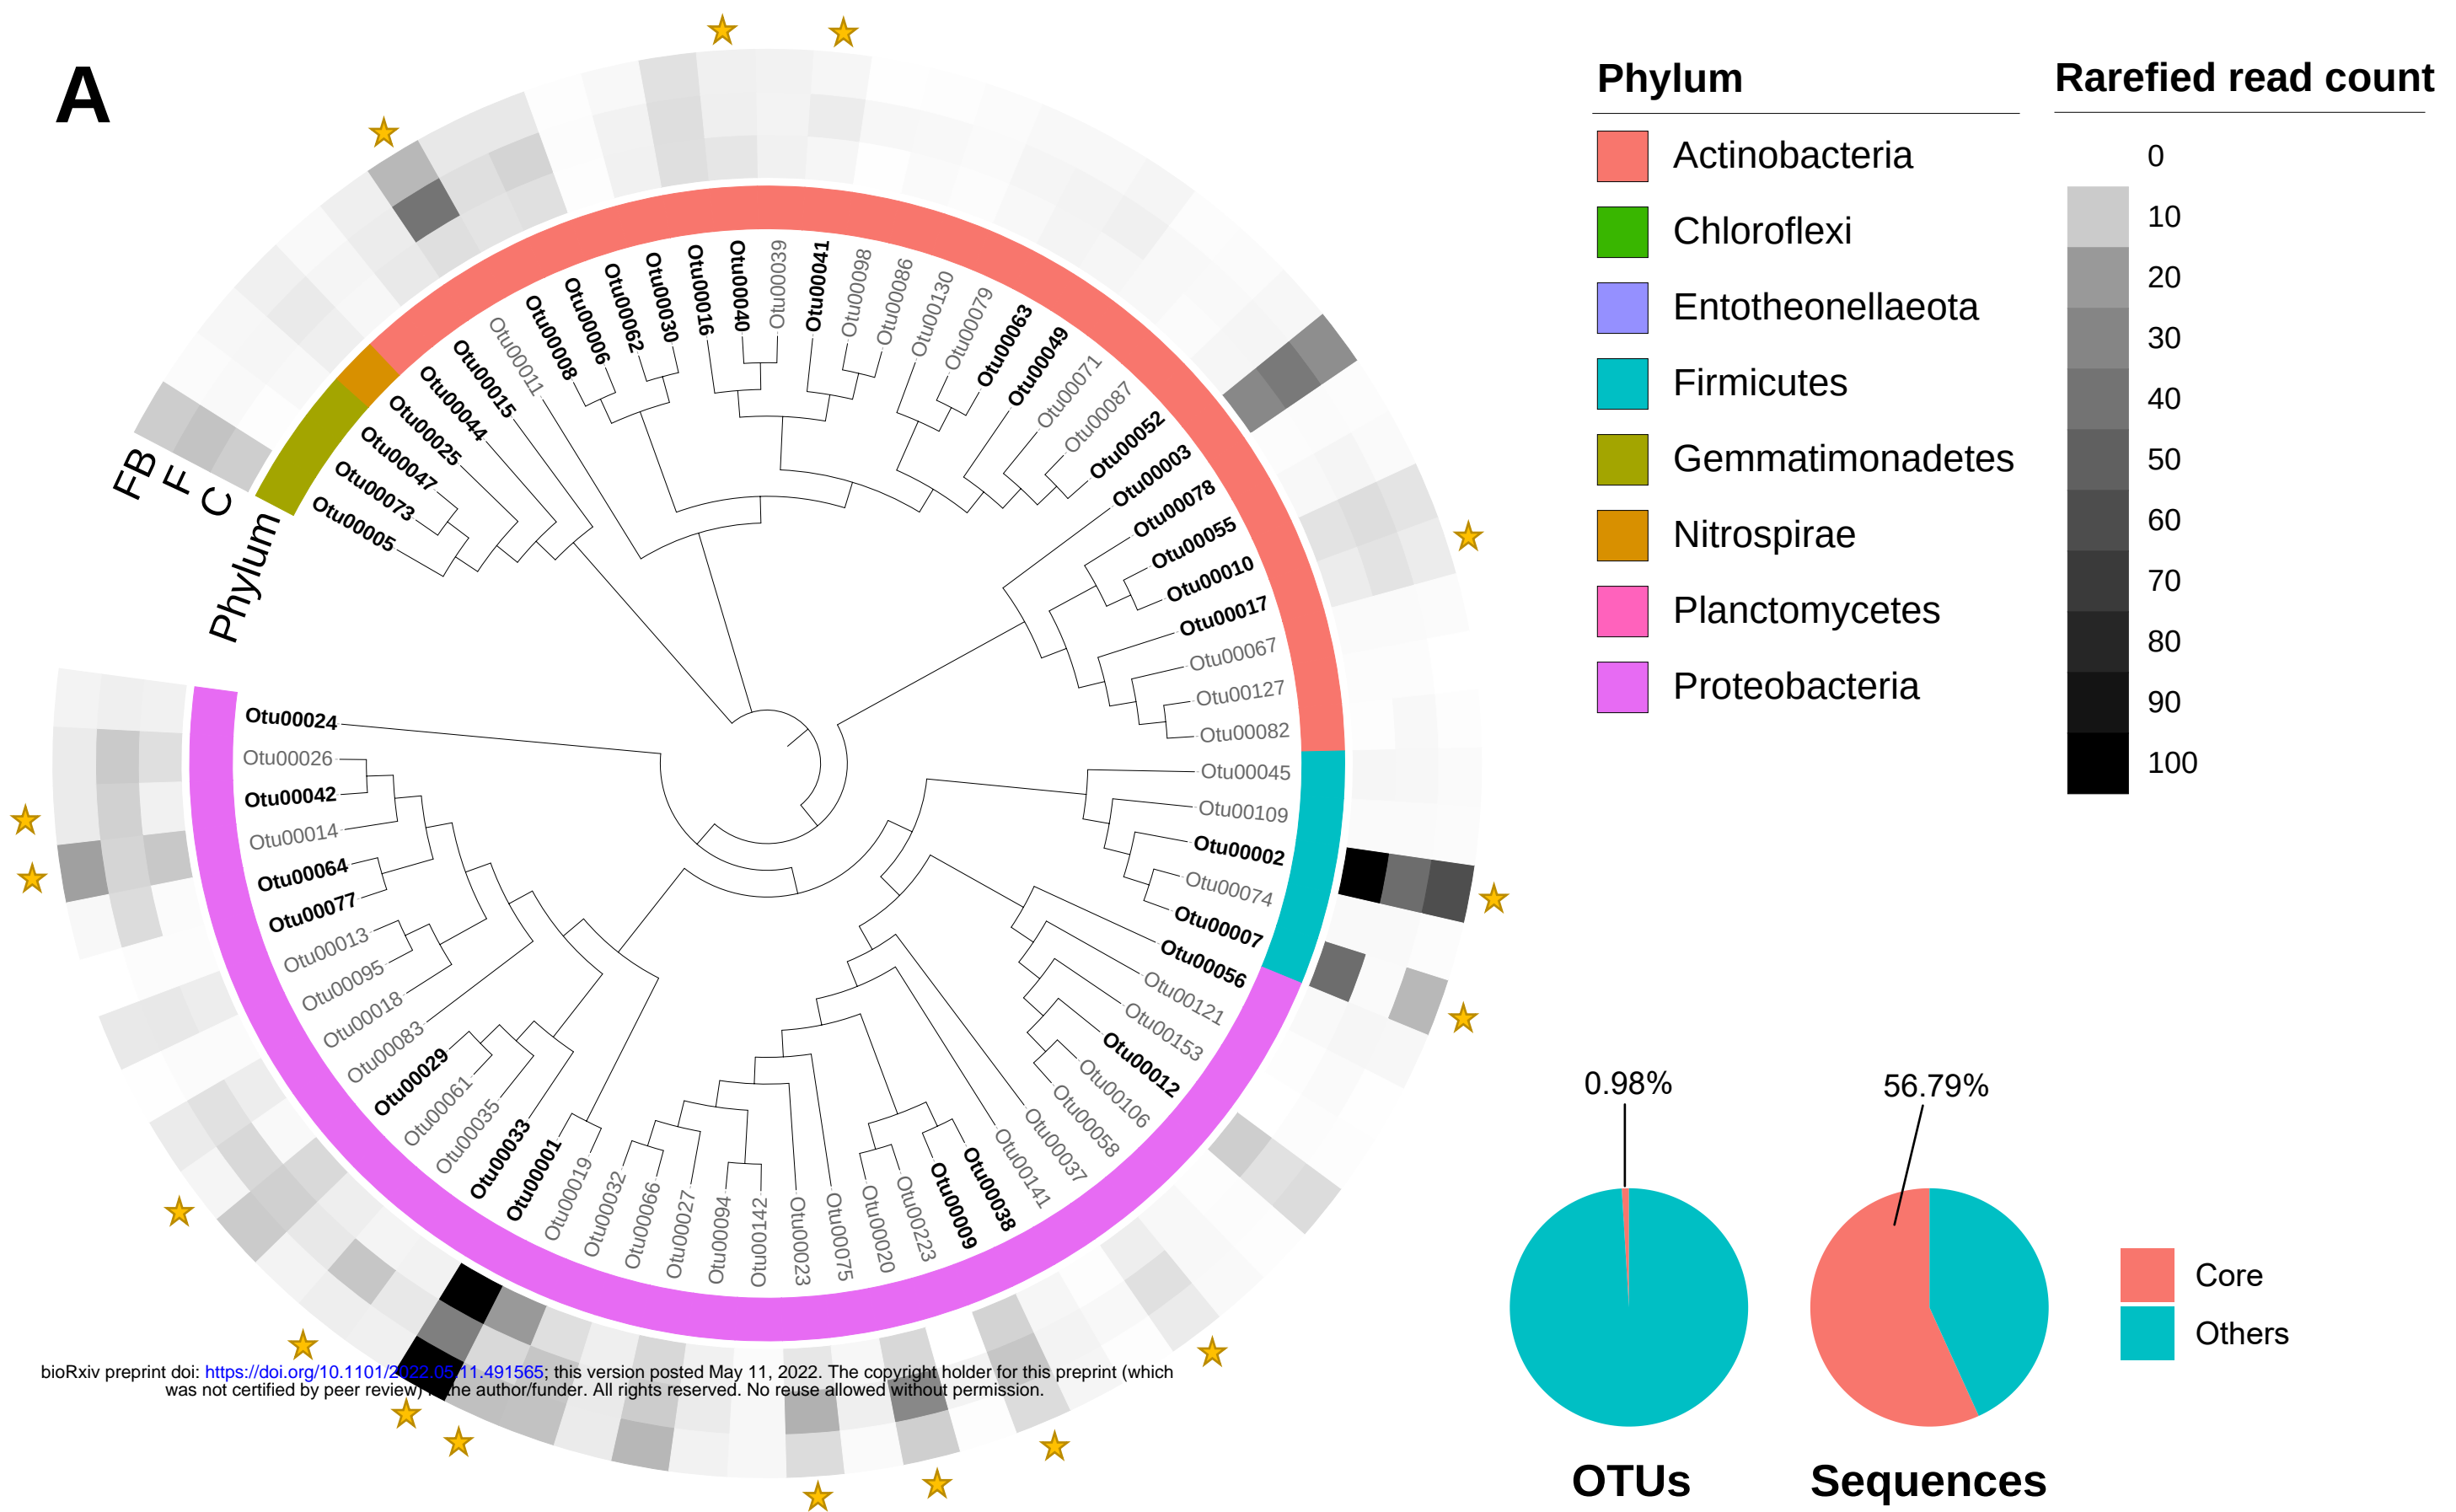**B**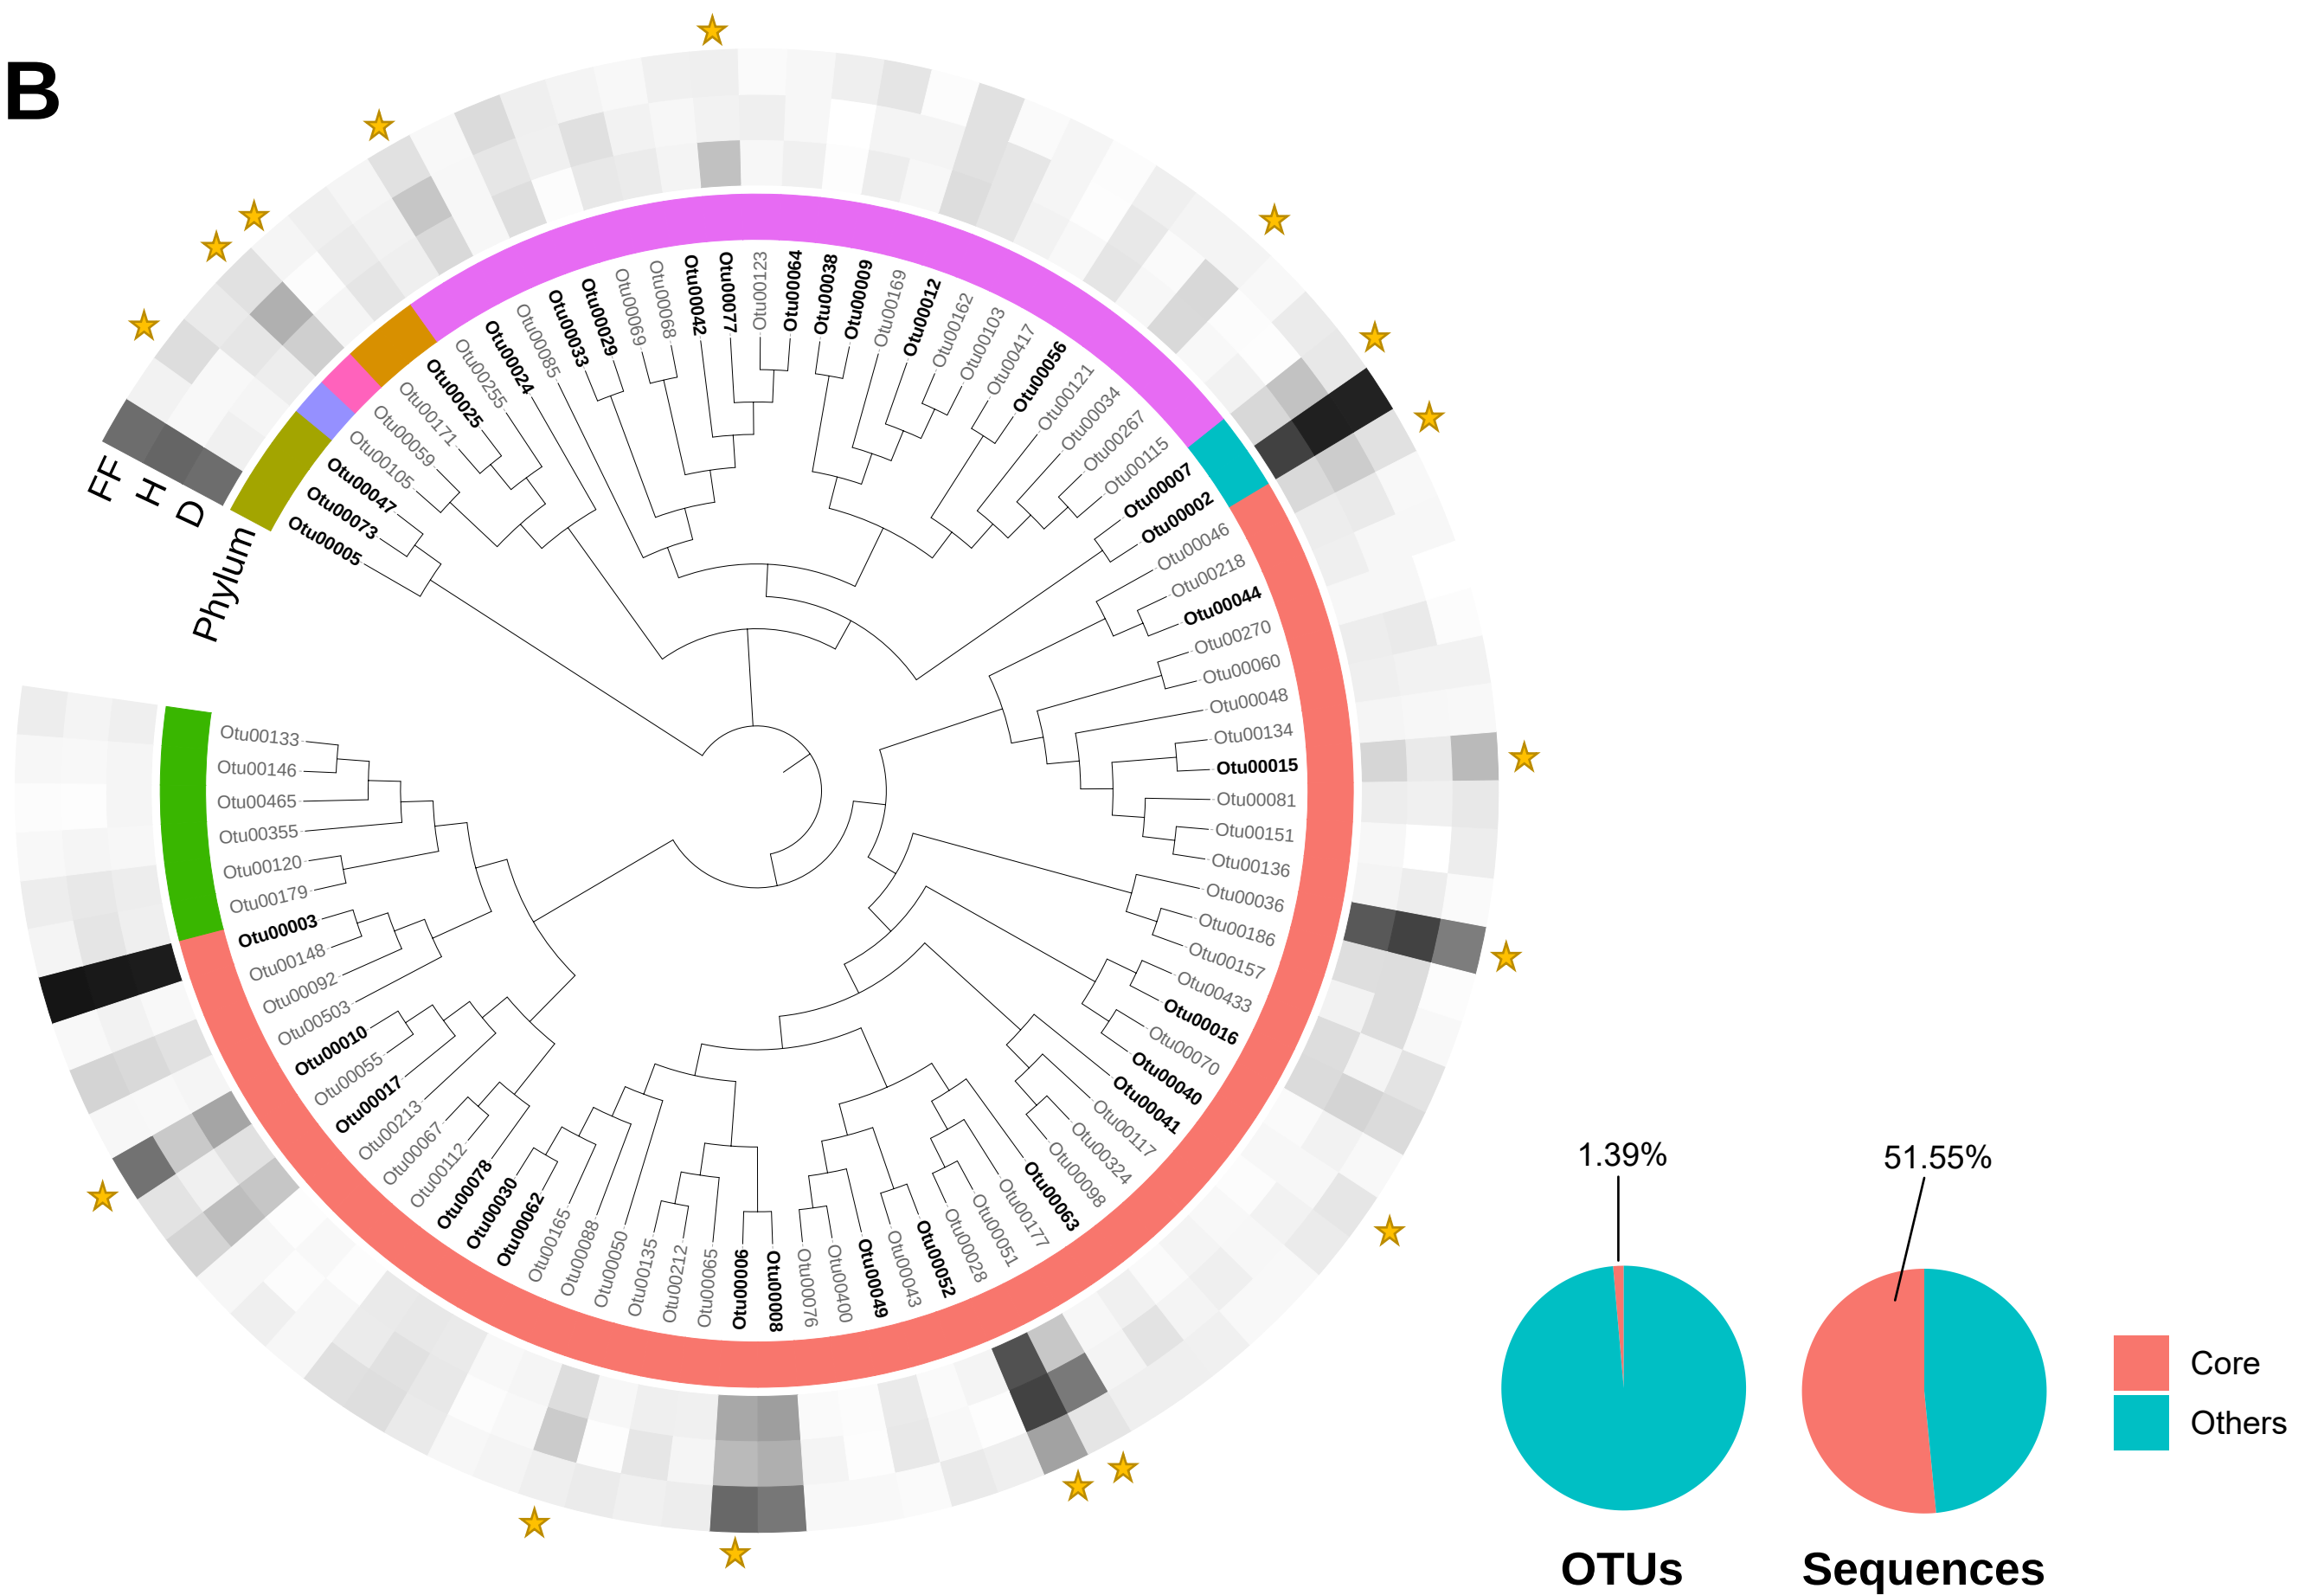

## Phylum

- Gemmatimonadetes
- Nitrospirae
- Proteobacteria
- Firmicutes
- Actinobacteria

## Source

- Glasshouse
- Field

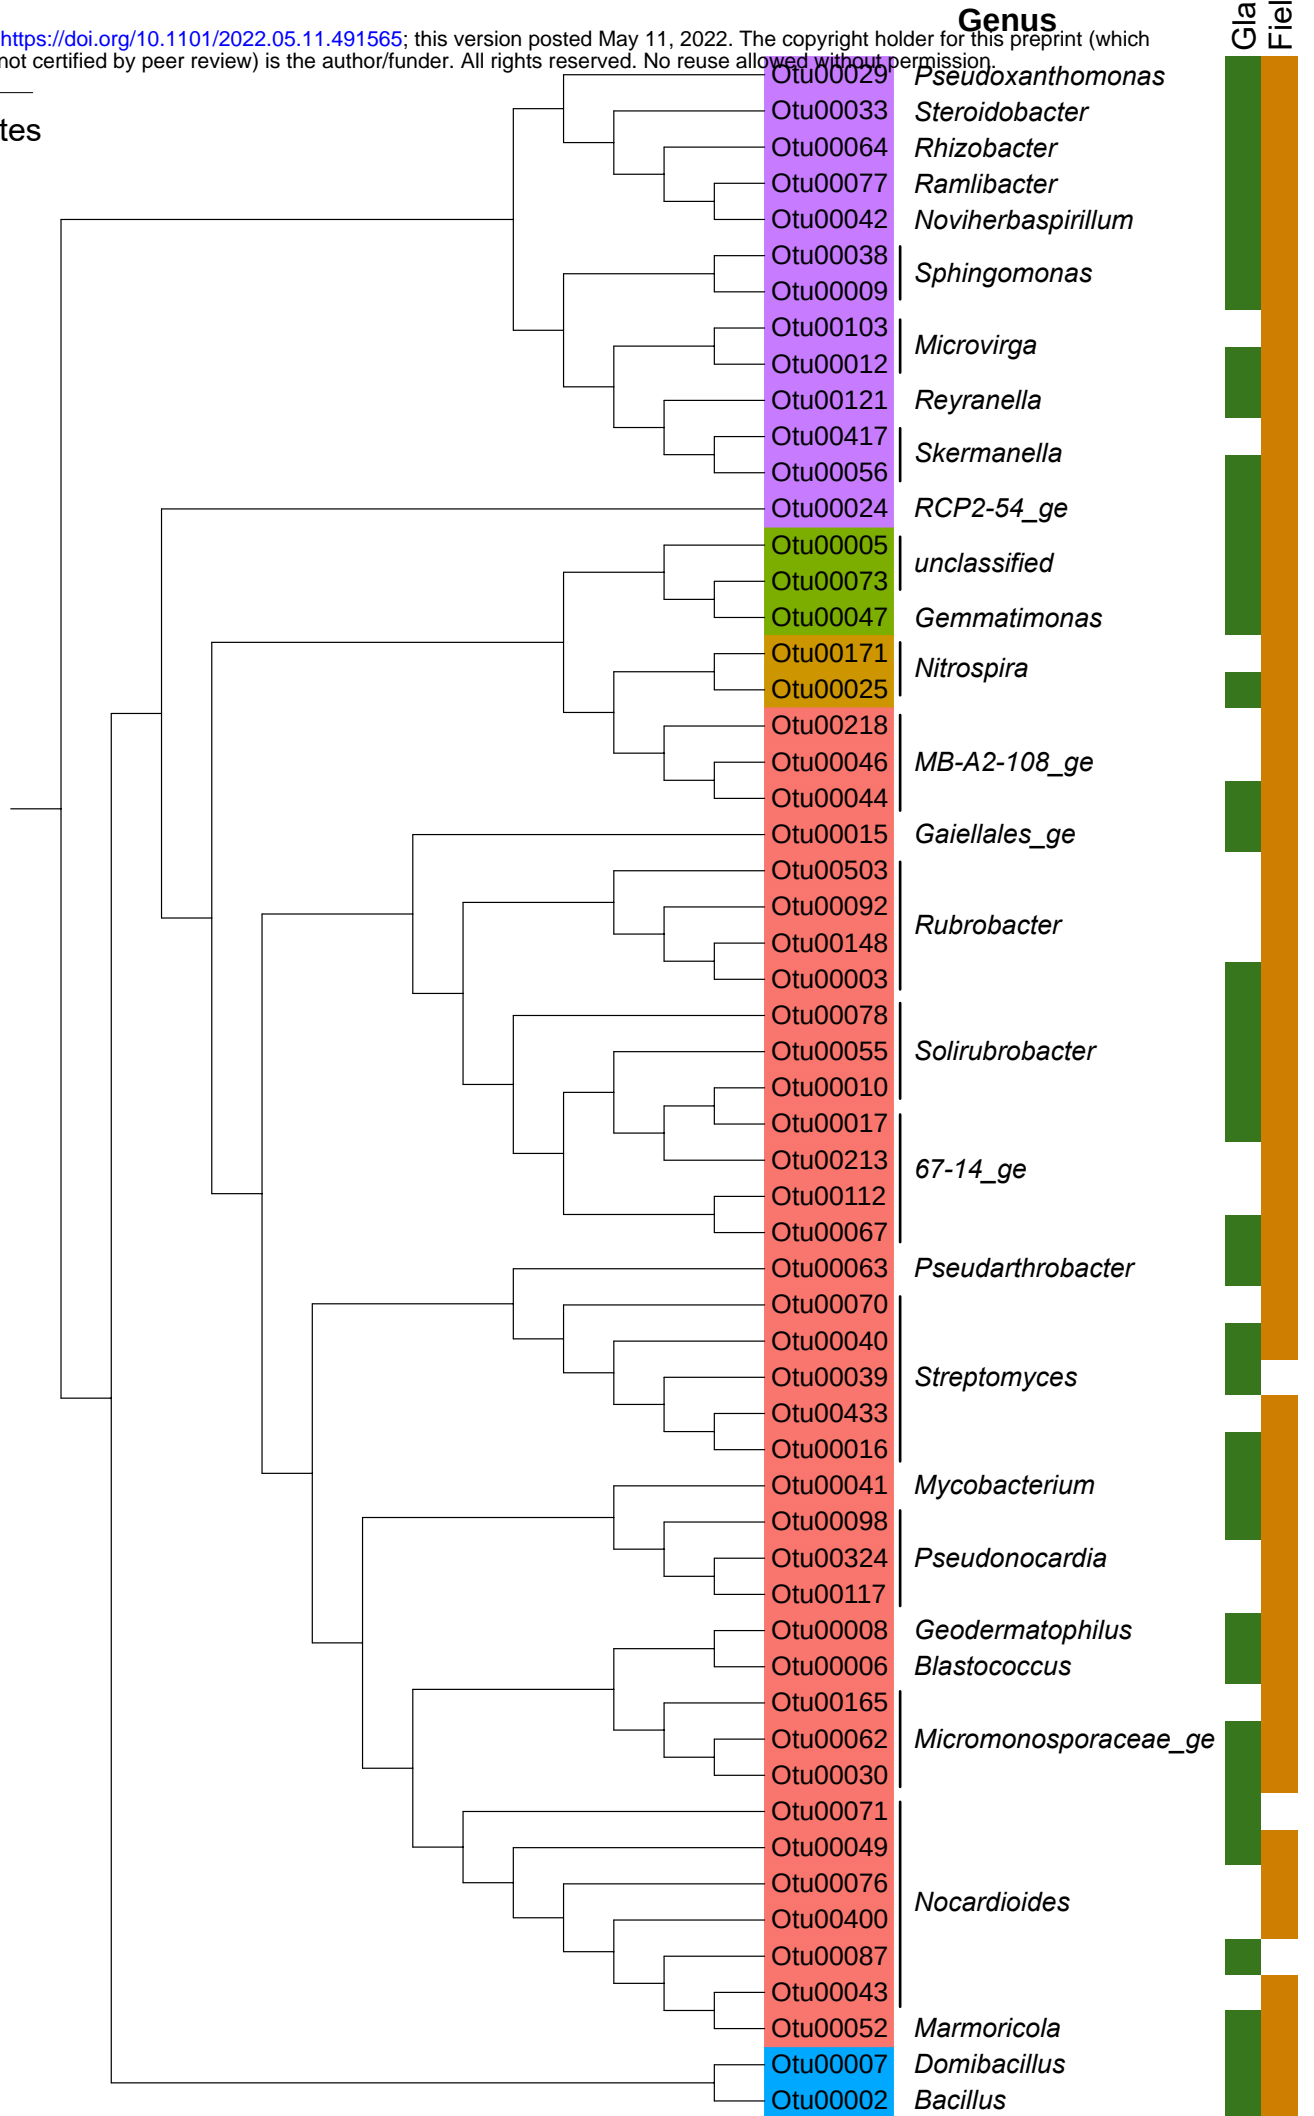



**A**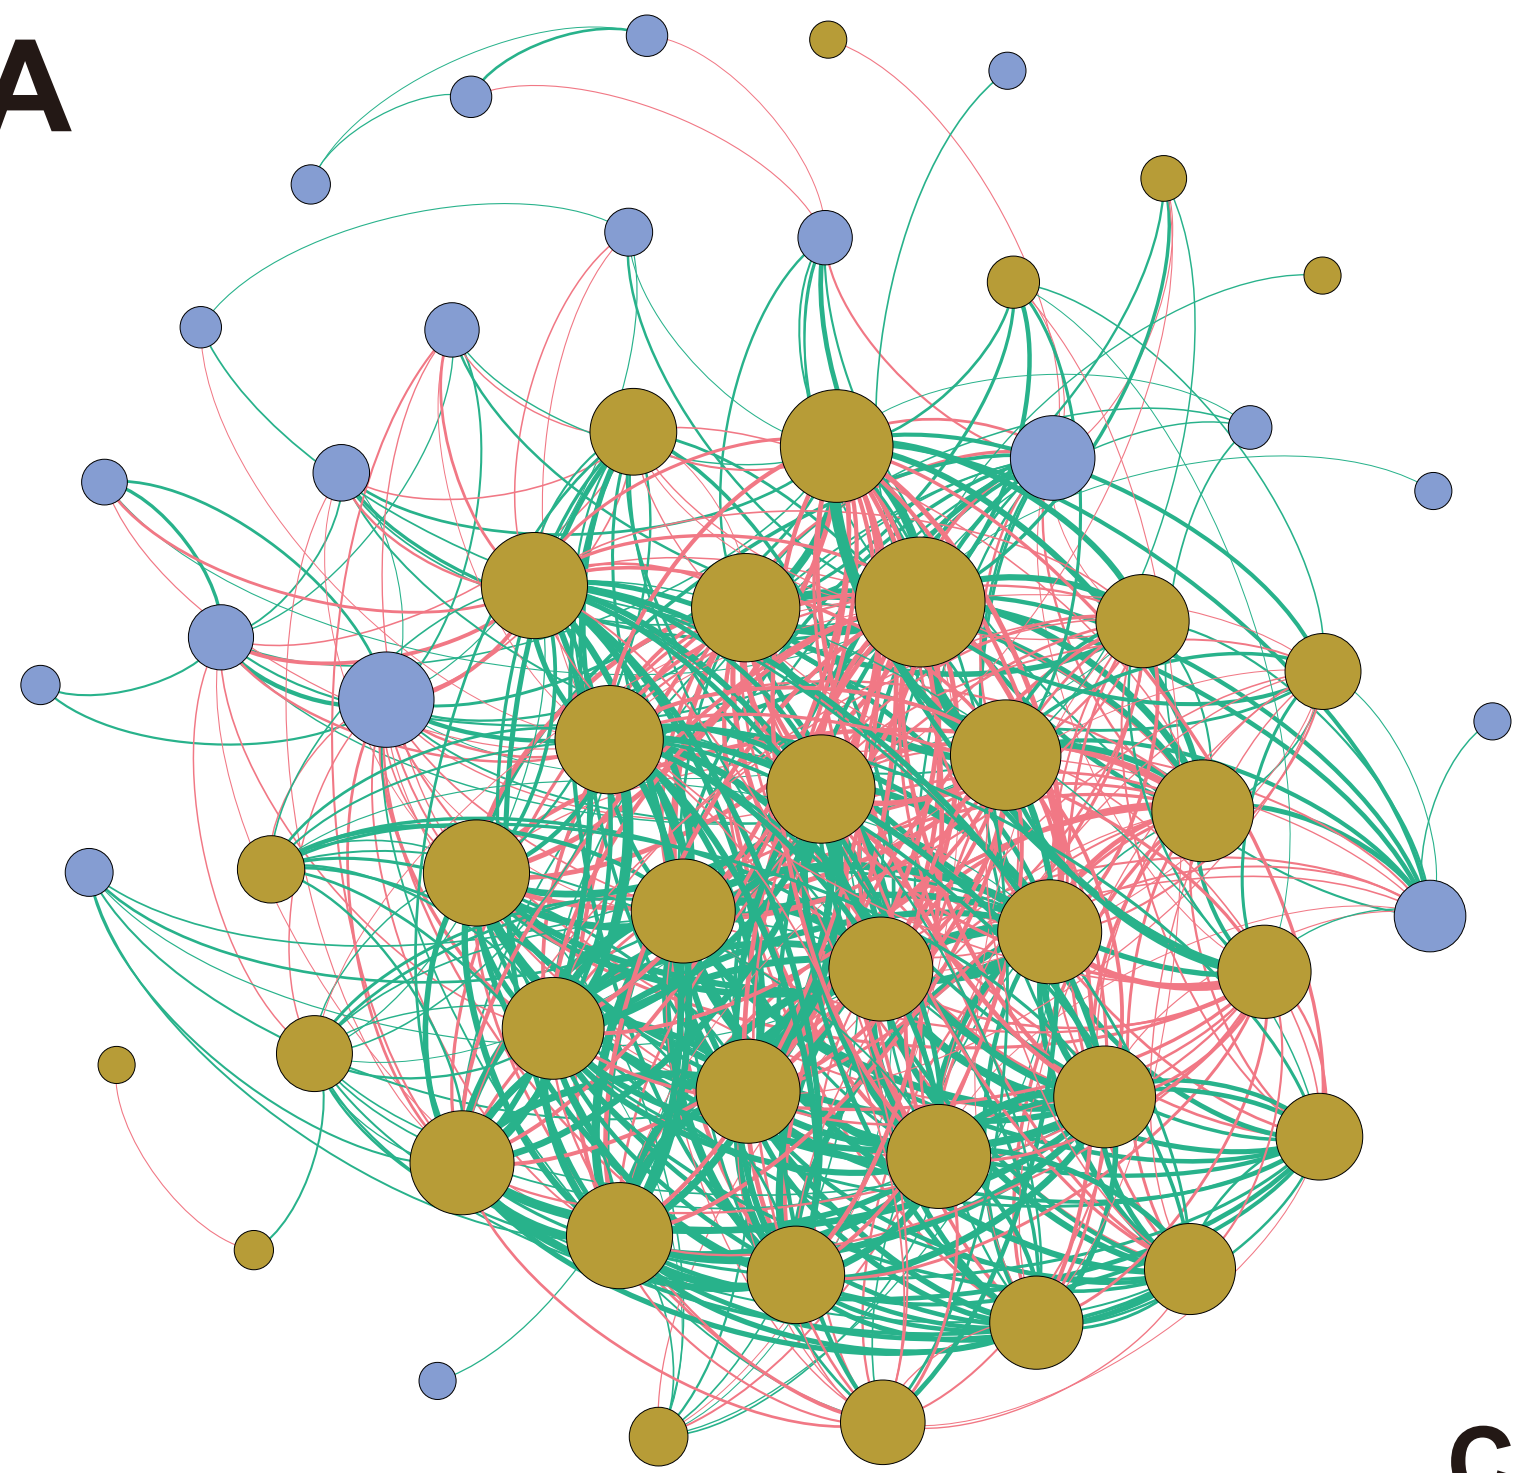**C**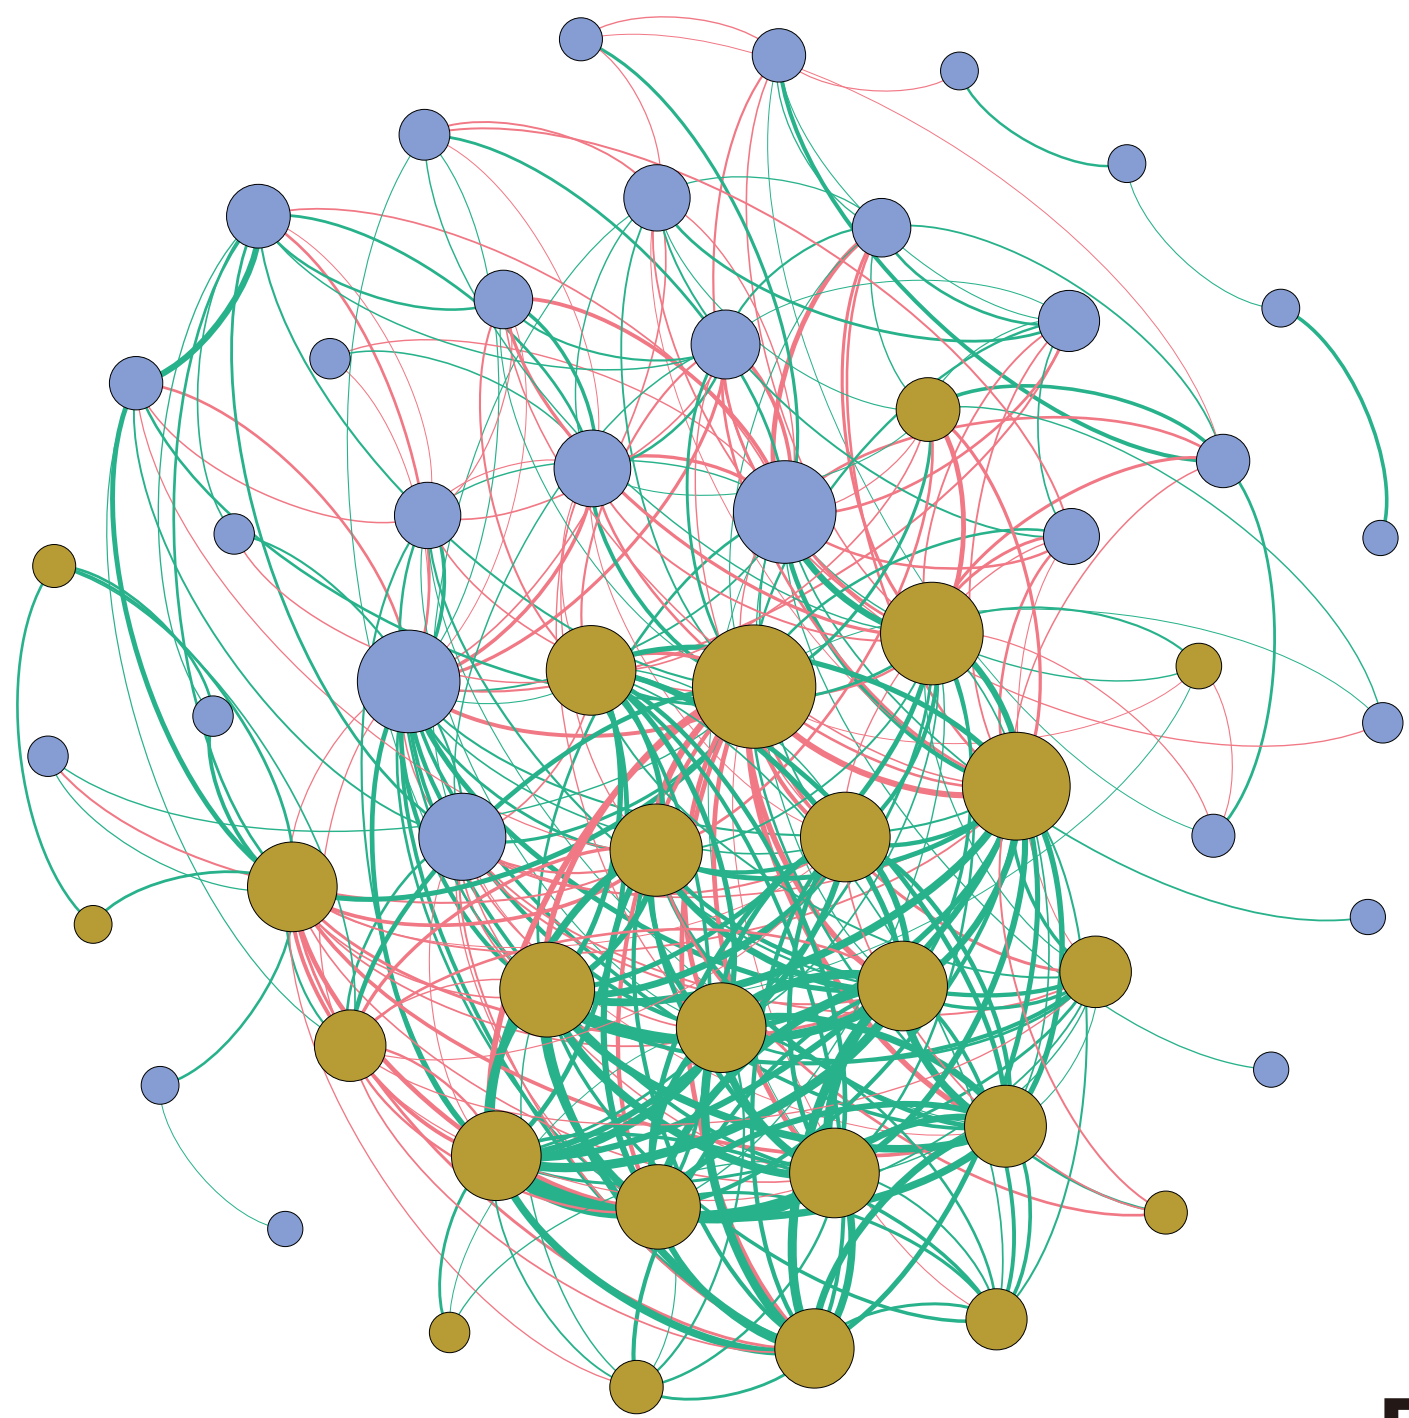**F**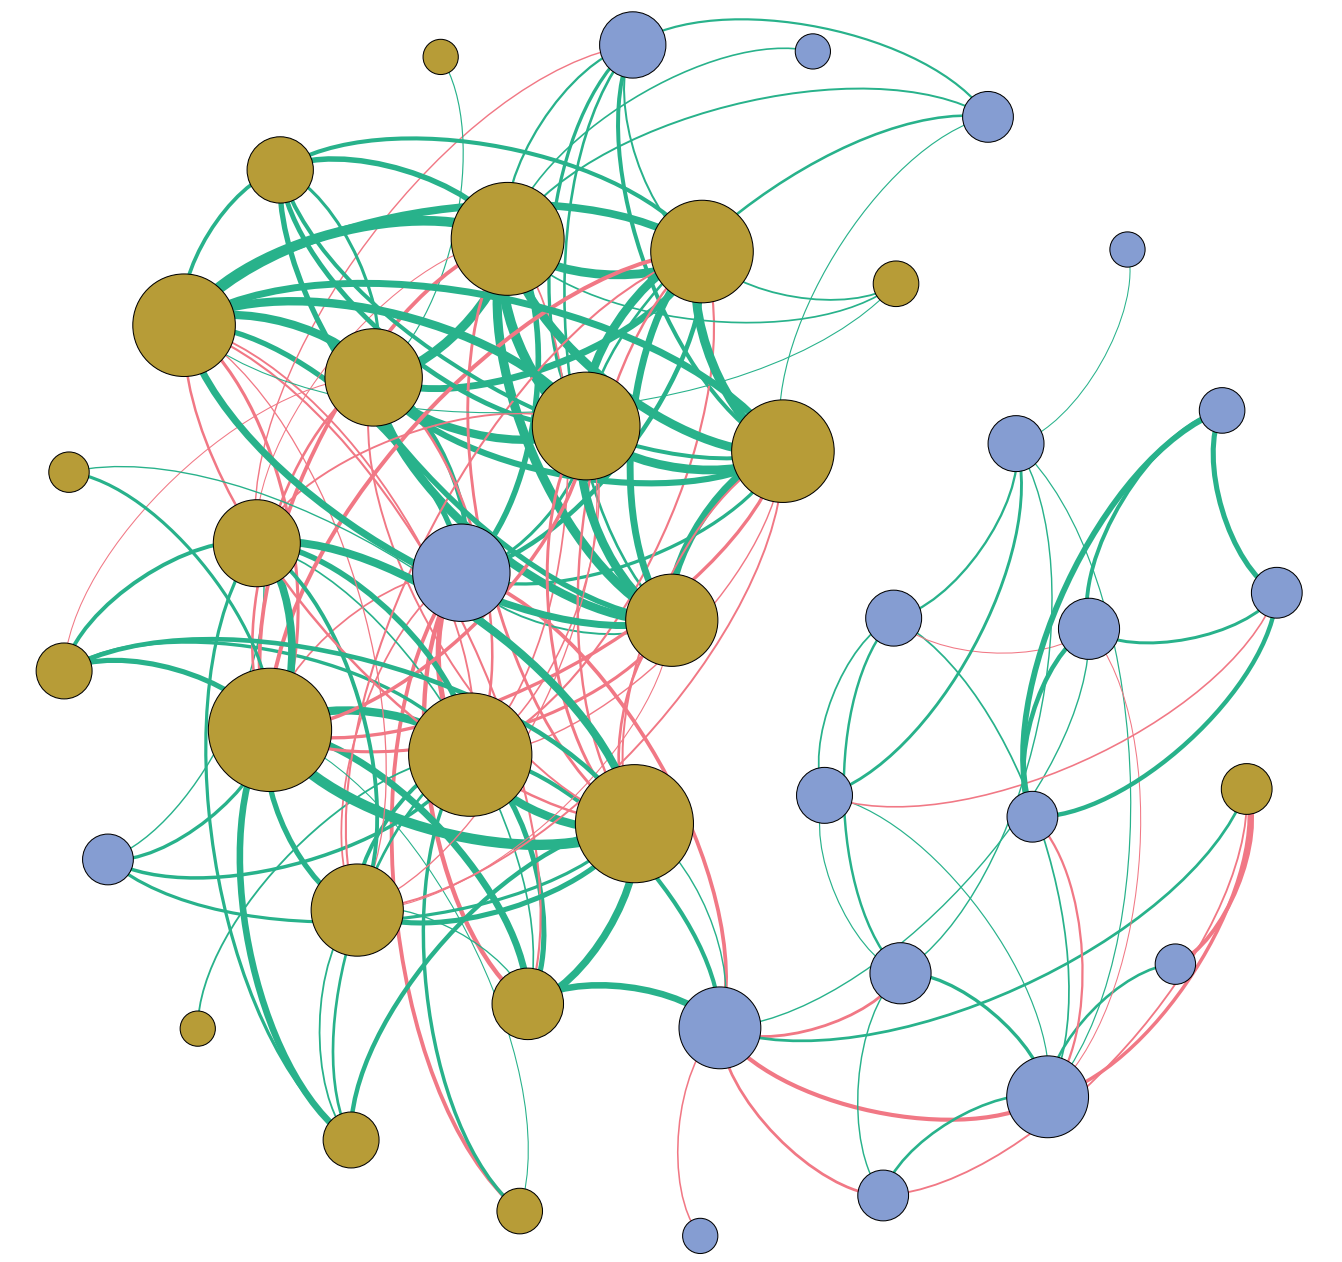**FB****B**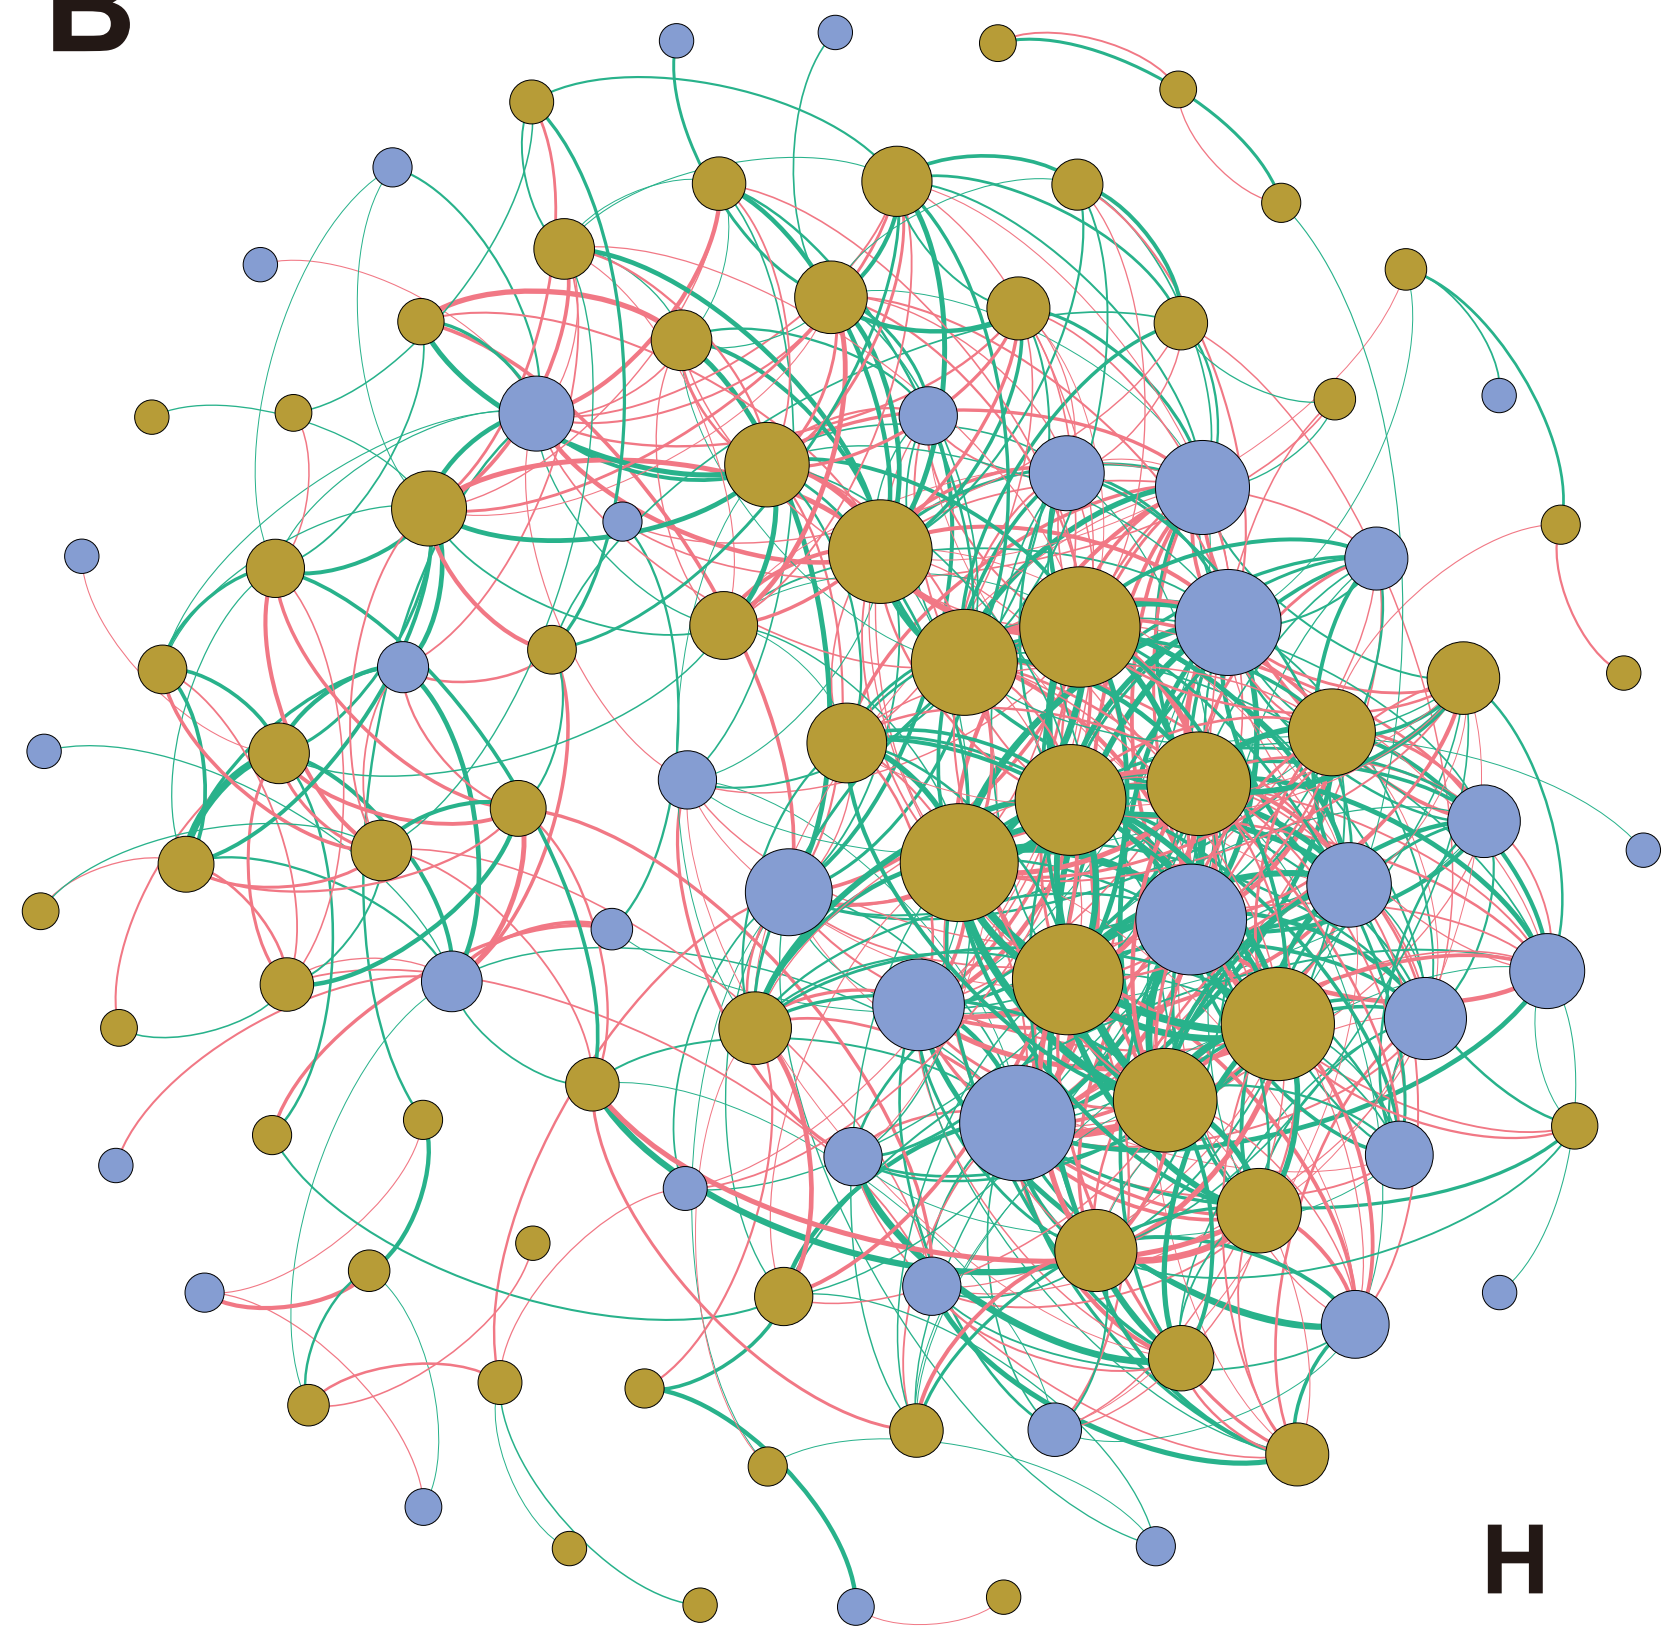**H**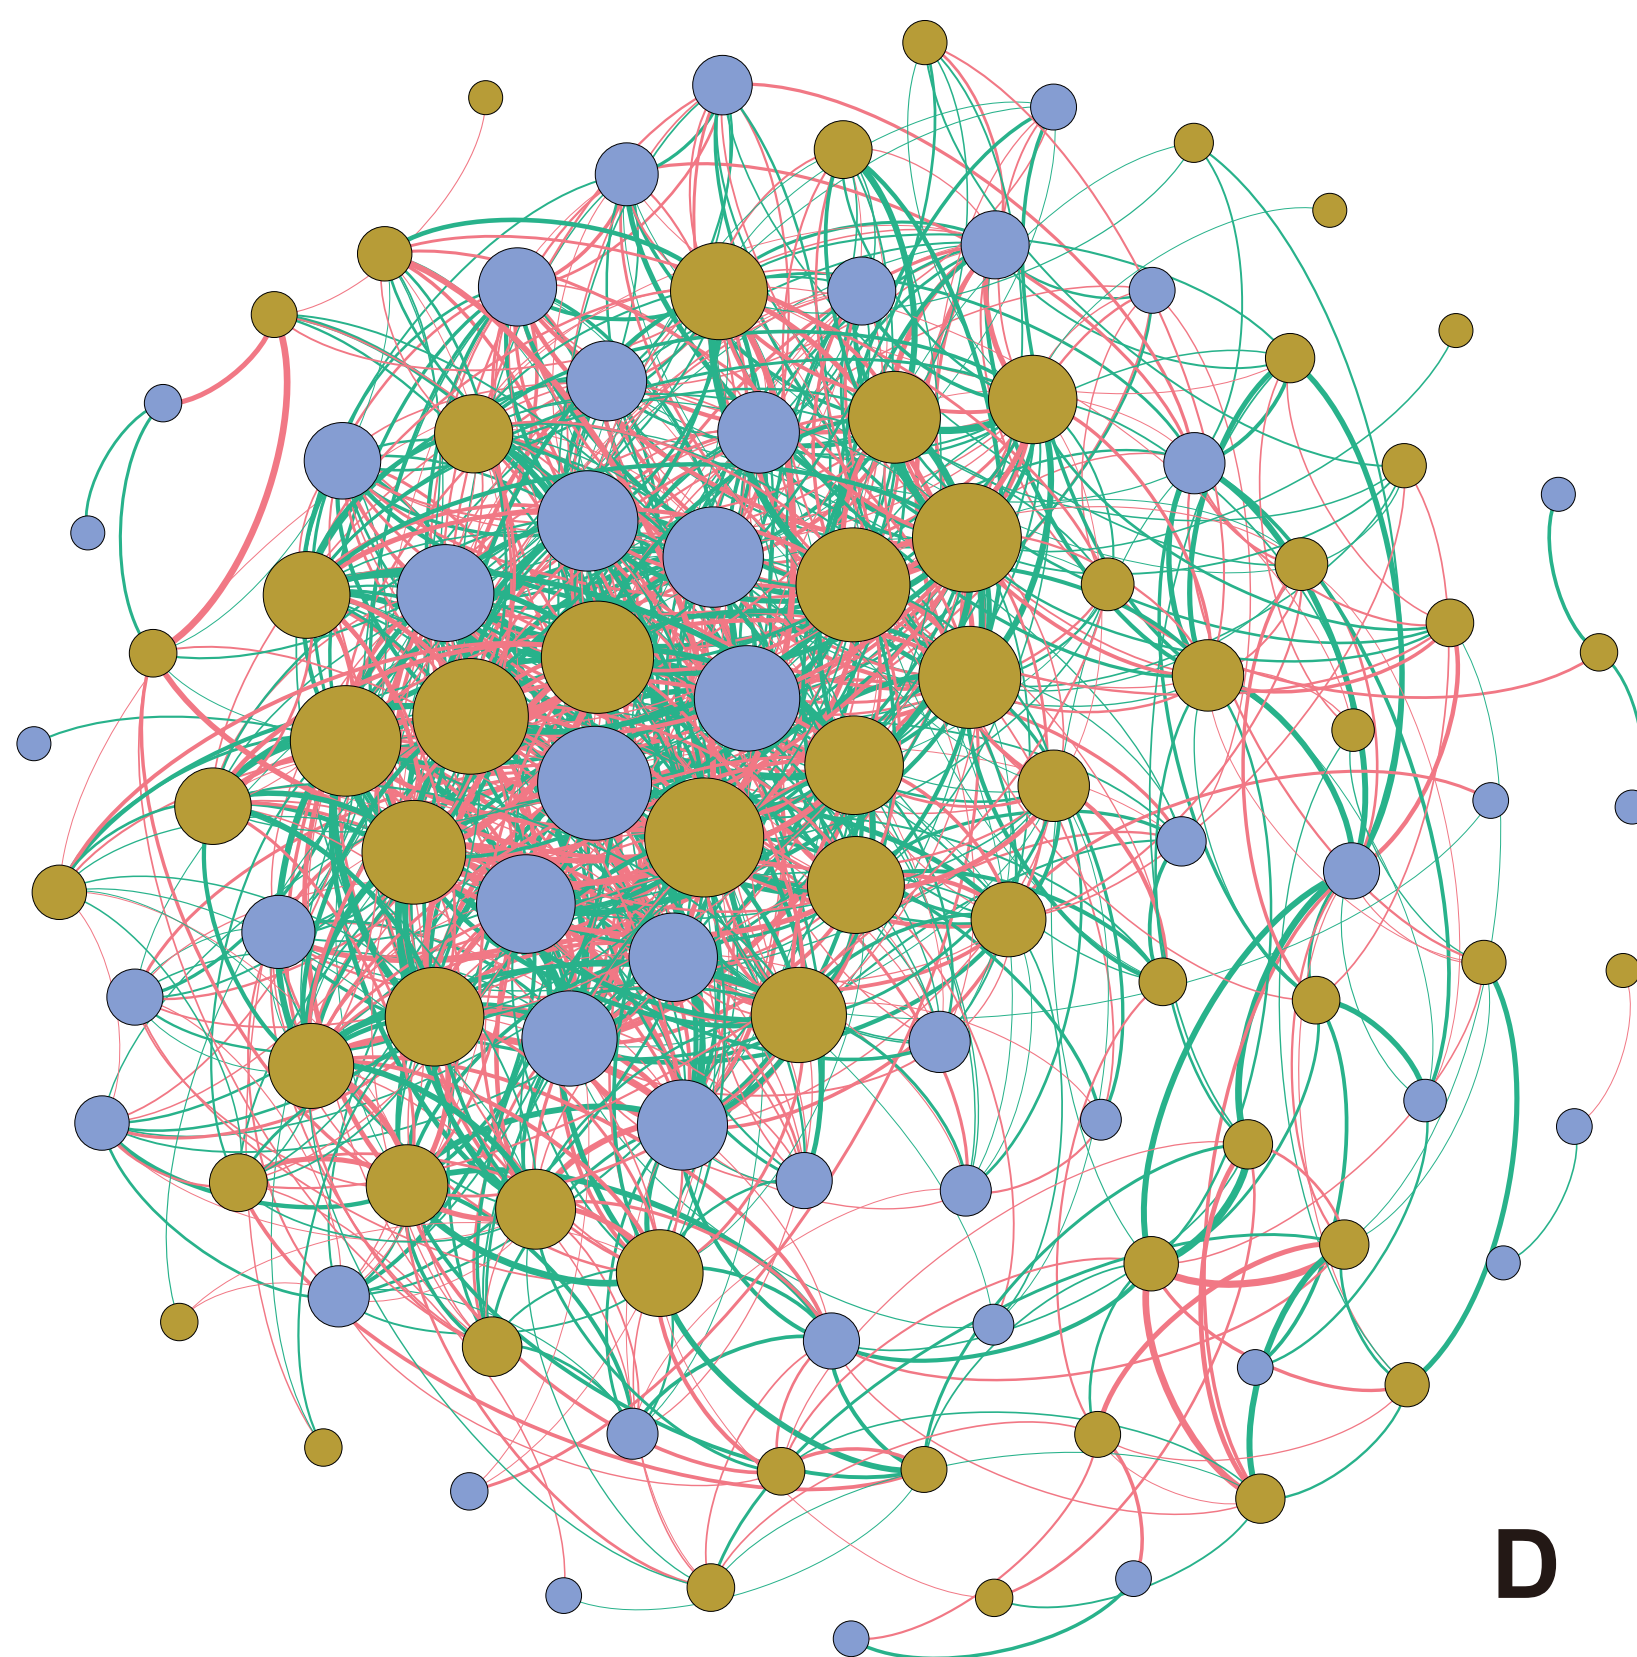**D**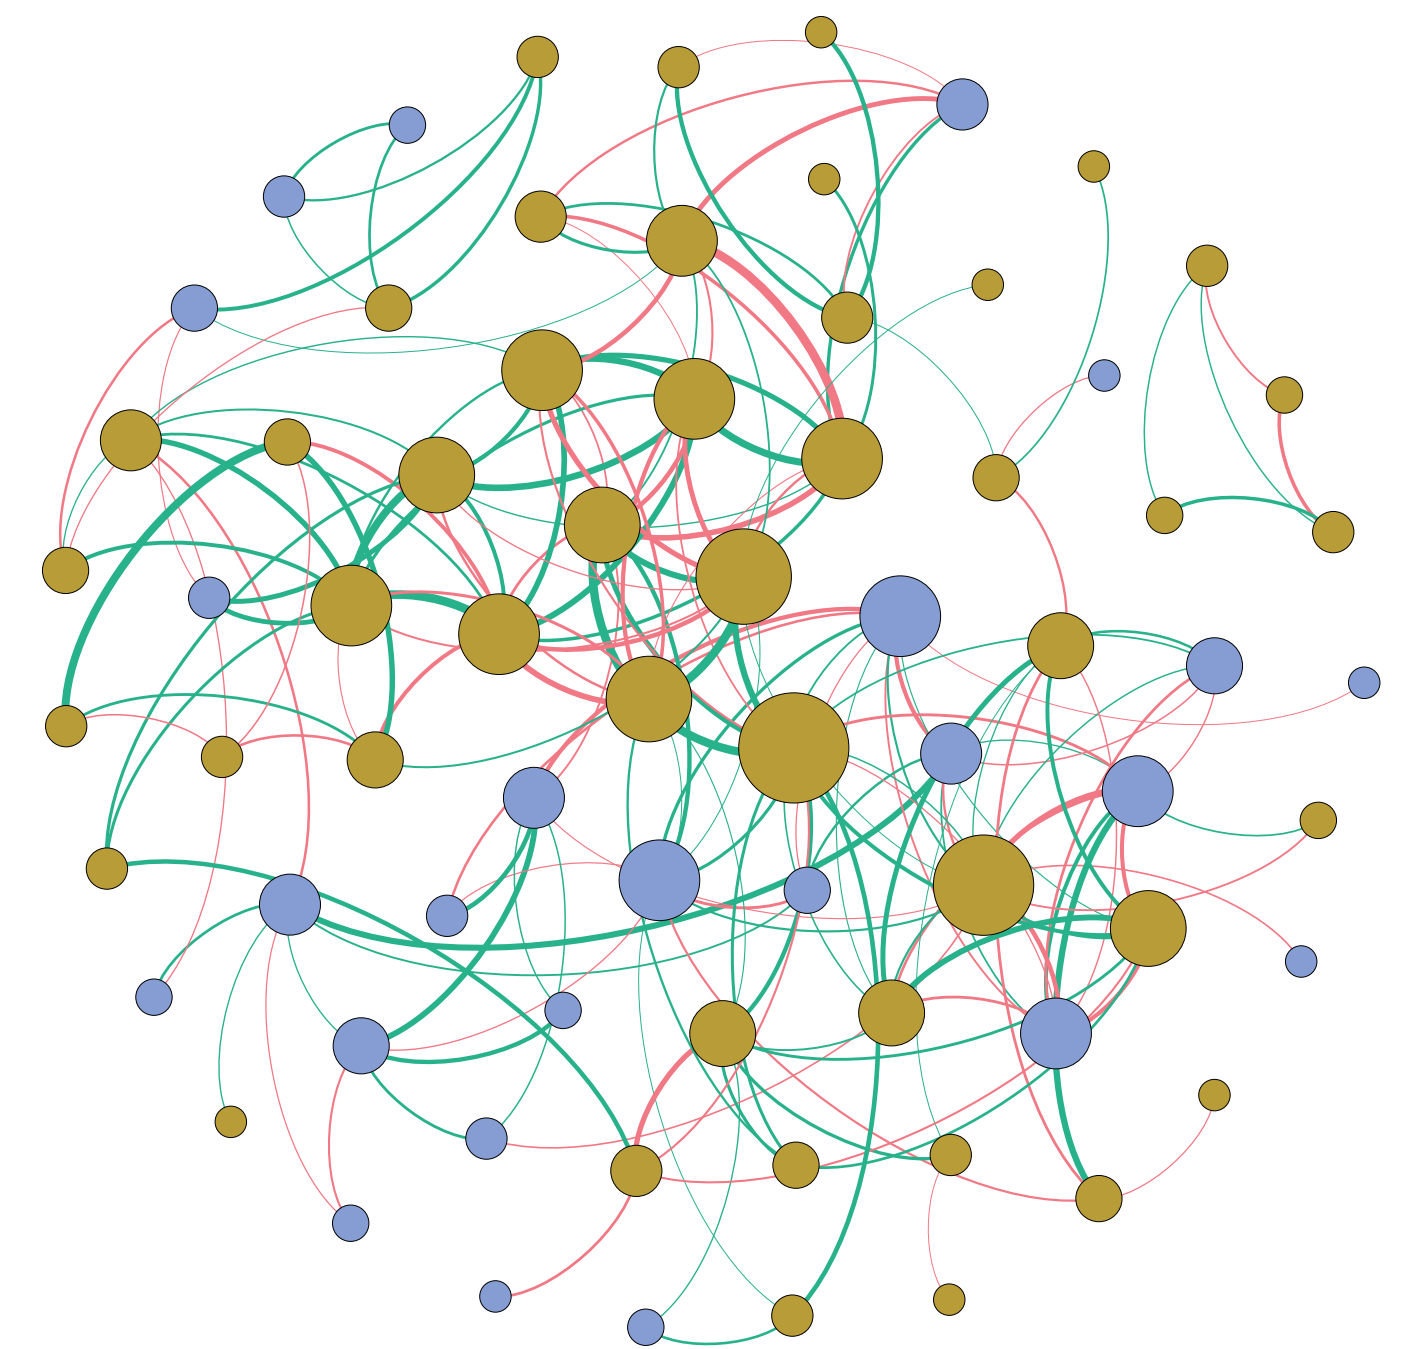**FF**

bioRxiv preprint doi: <https://doi.org/10.1101/2022.05.11.491565>; this version posted May 11, 2022. The copyright holder for this preprint (which was not certified by peer review) is the author/funder. All rights reserved. No reuse allowed without permission.

● Bacteria   
 ● Fungi   
 — Positive Correlation   
 — Negative Correlation   
 Degree ● ● ● ●   
 Correlation 0.6 1.0



**A**

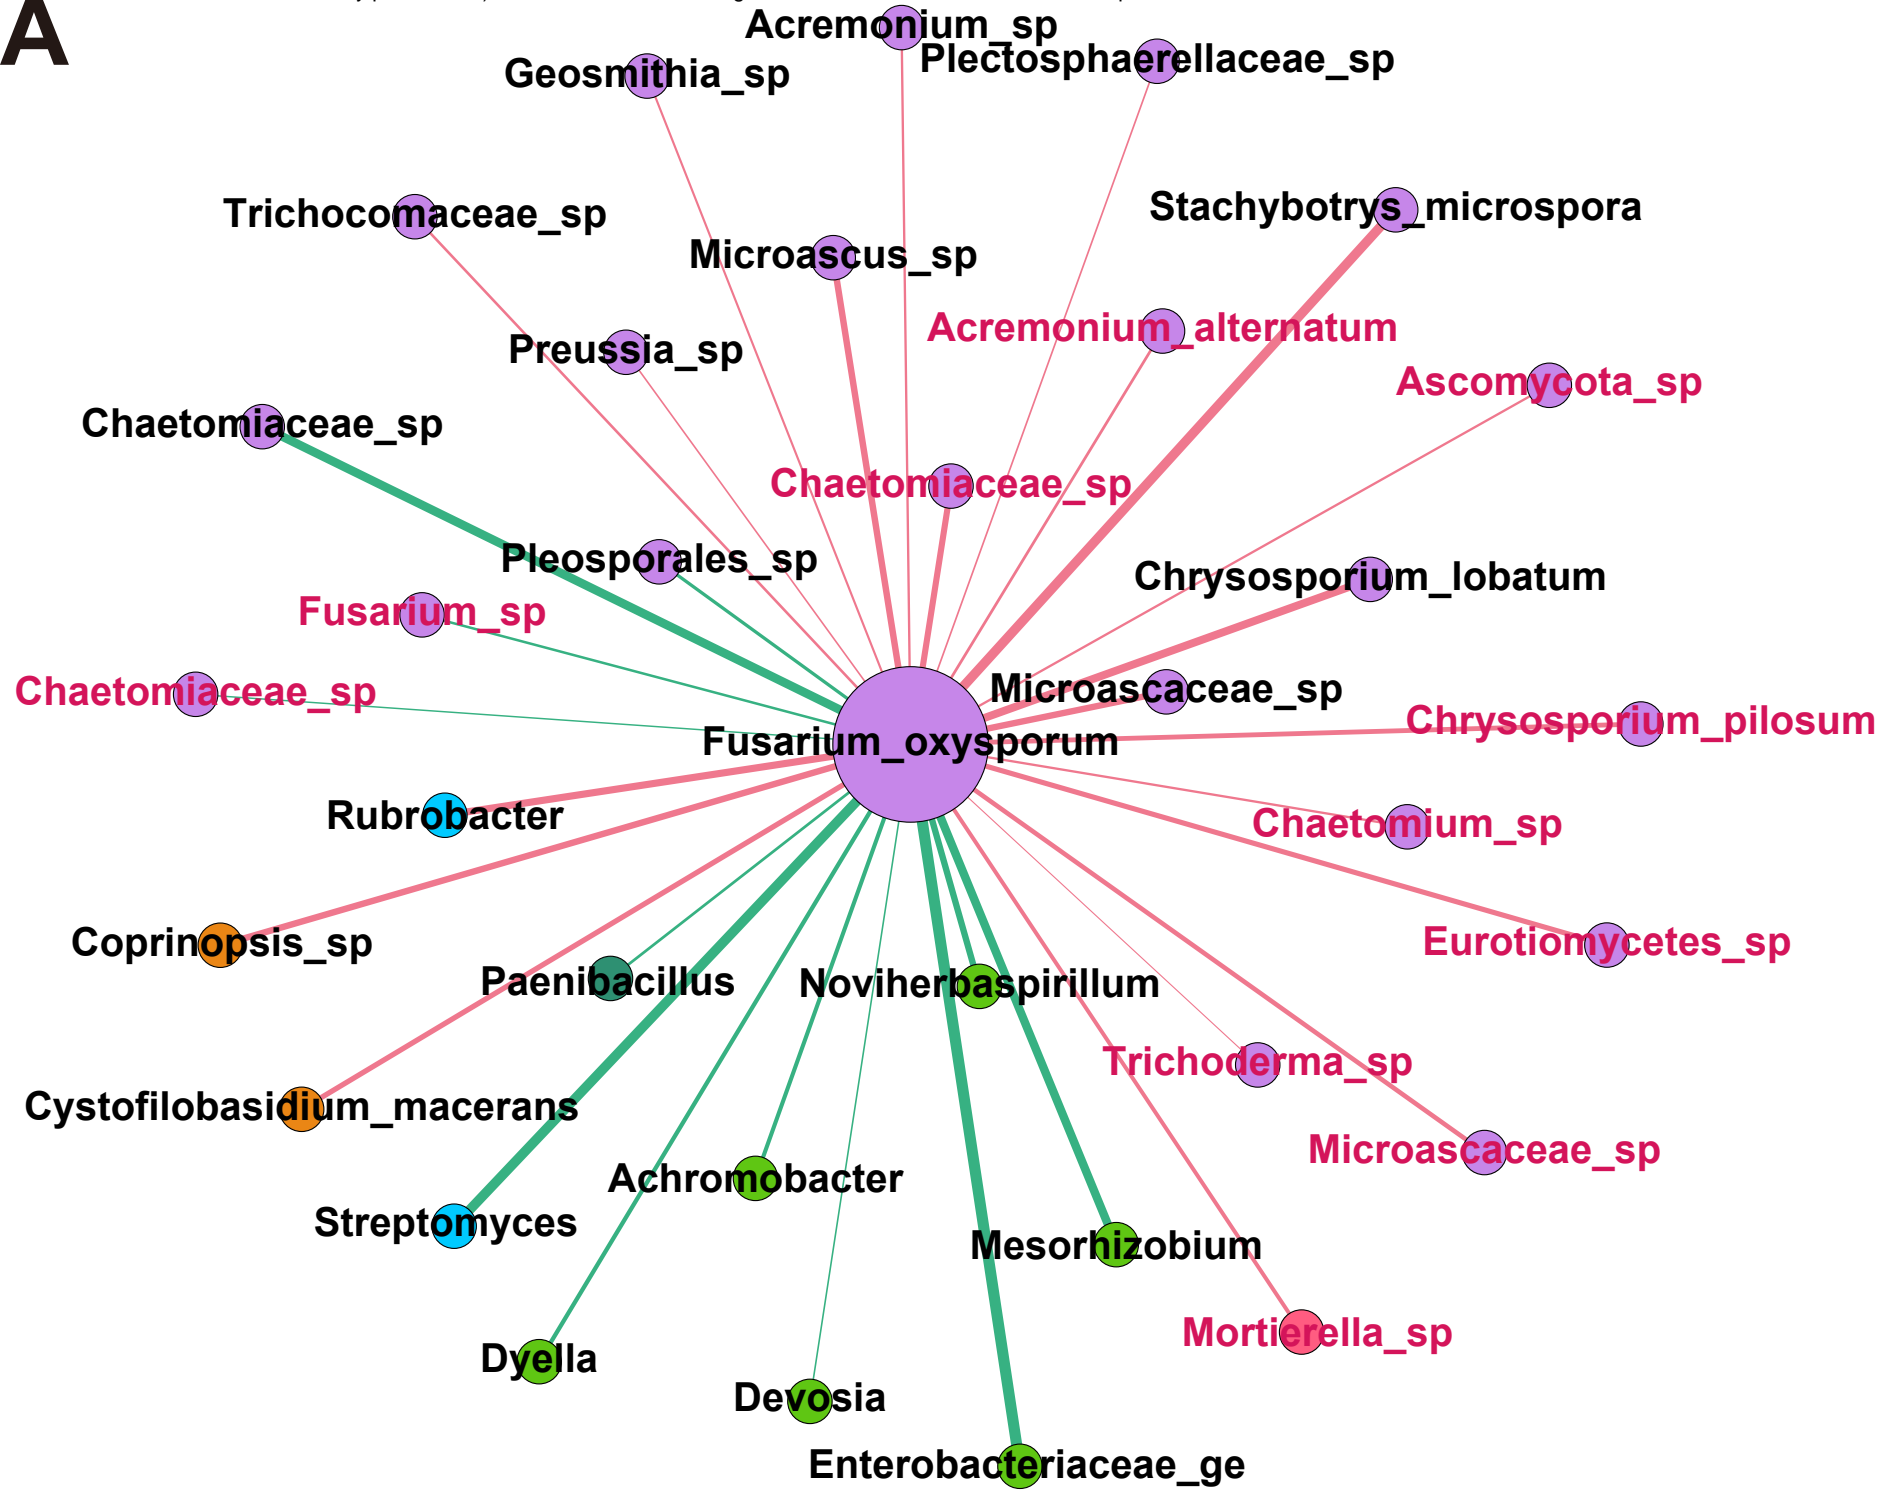

**B**

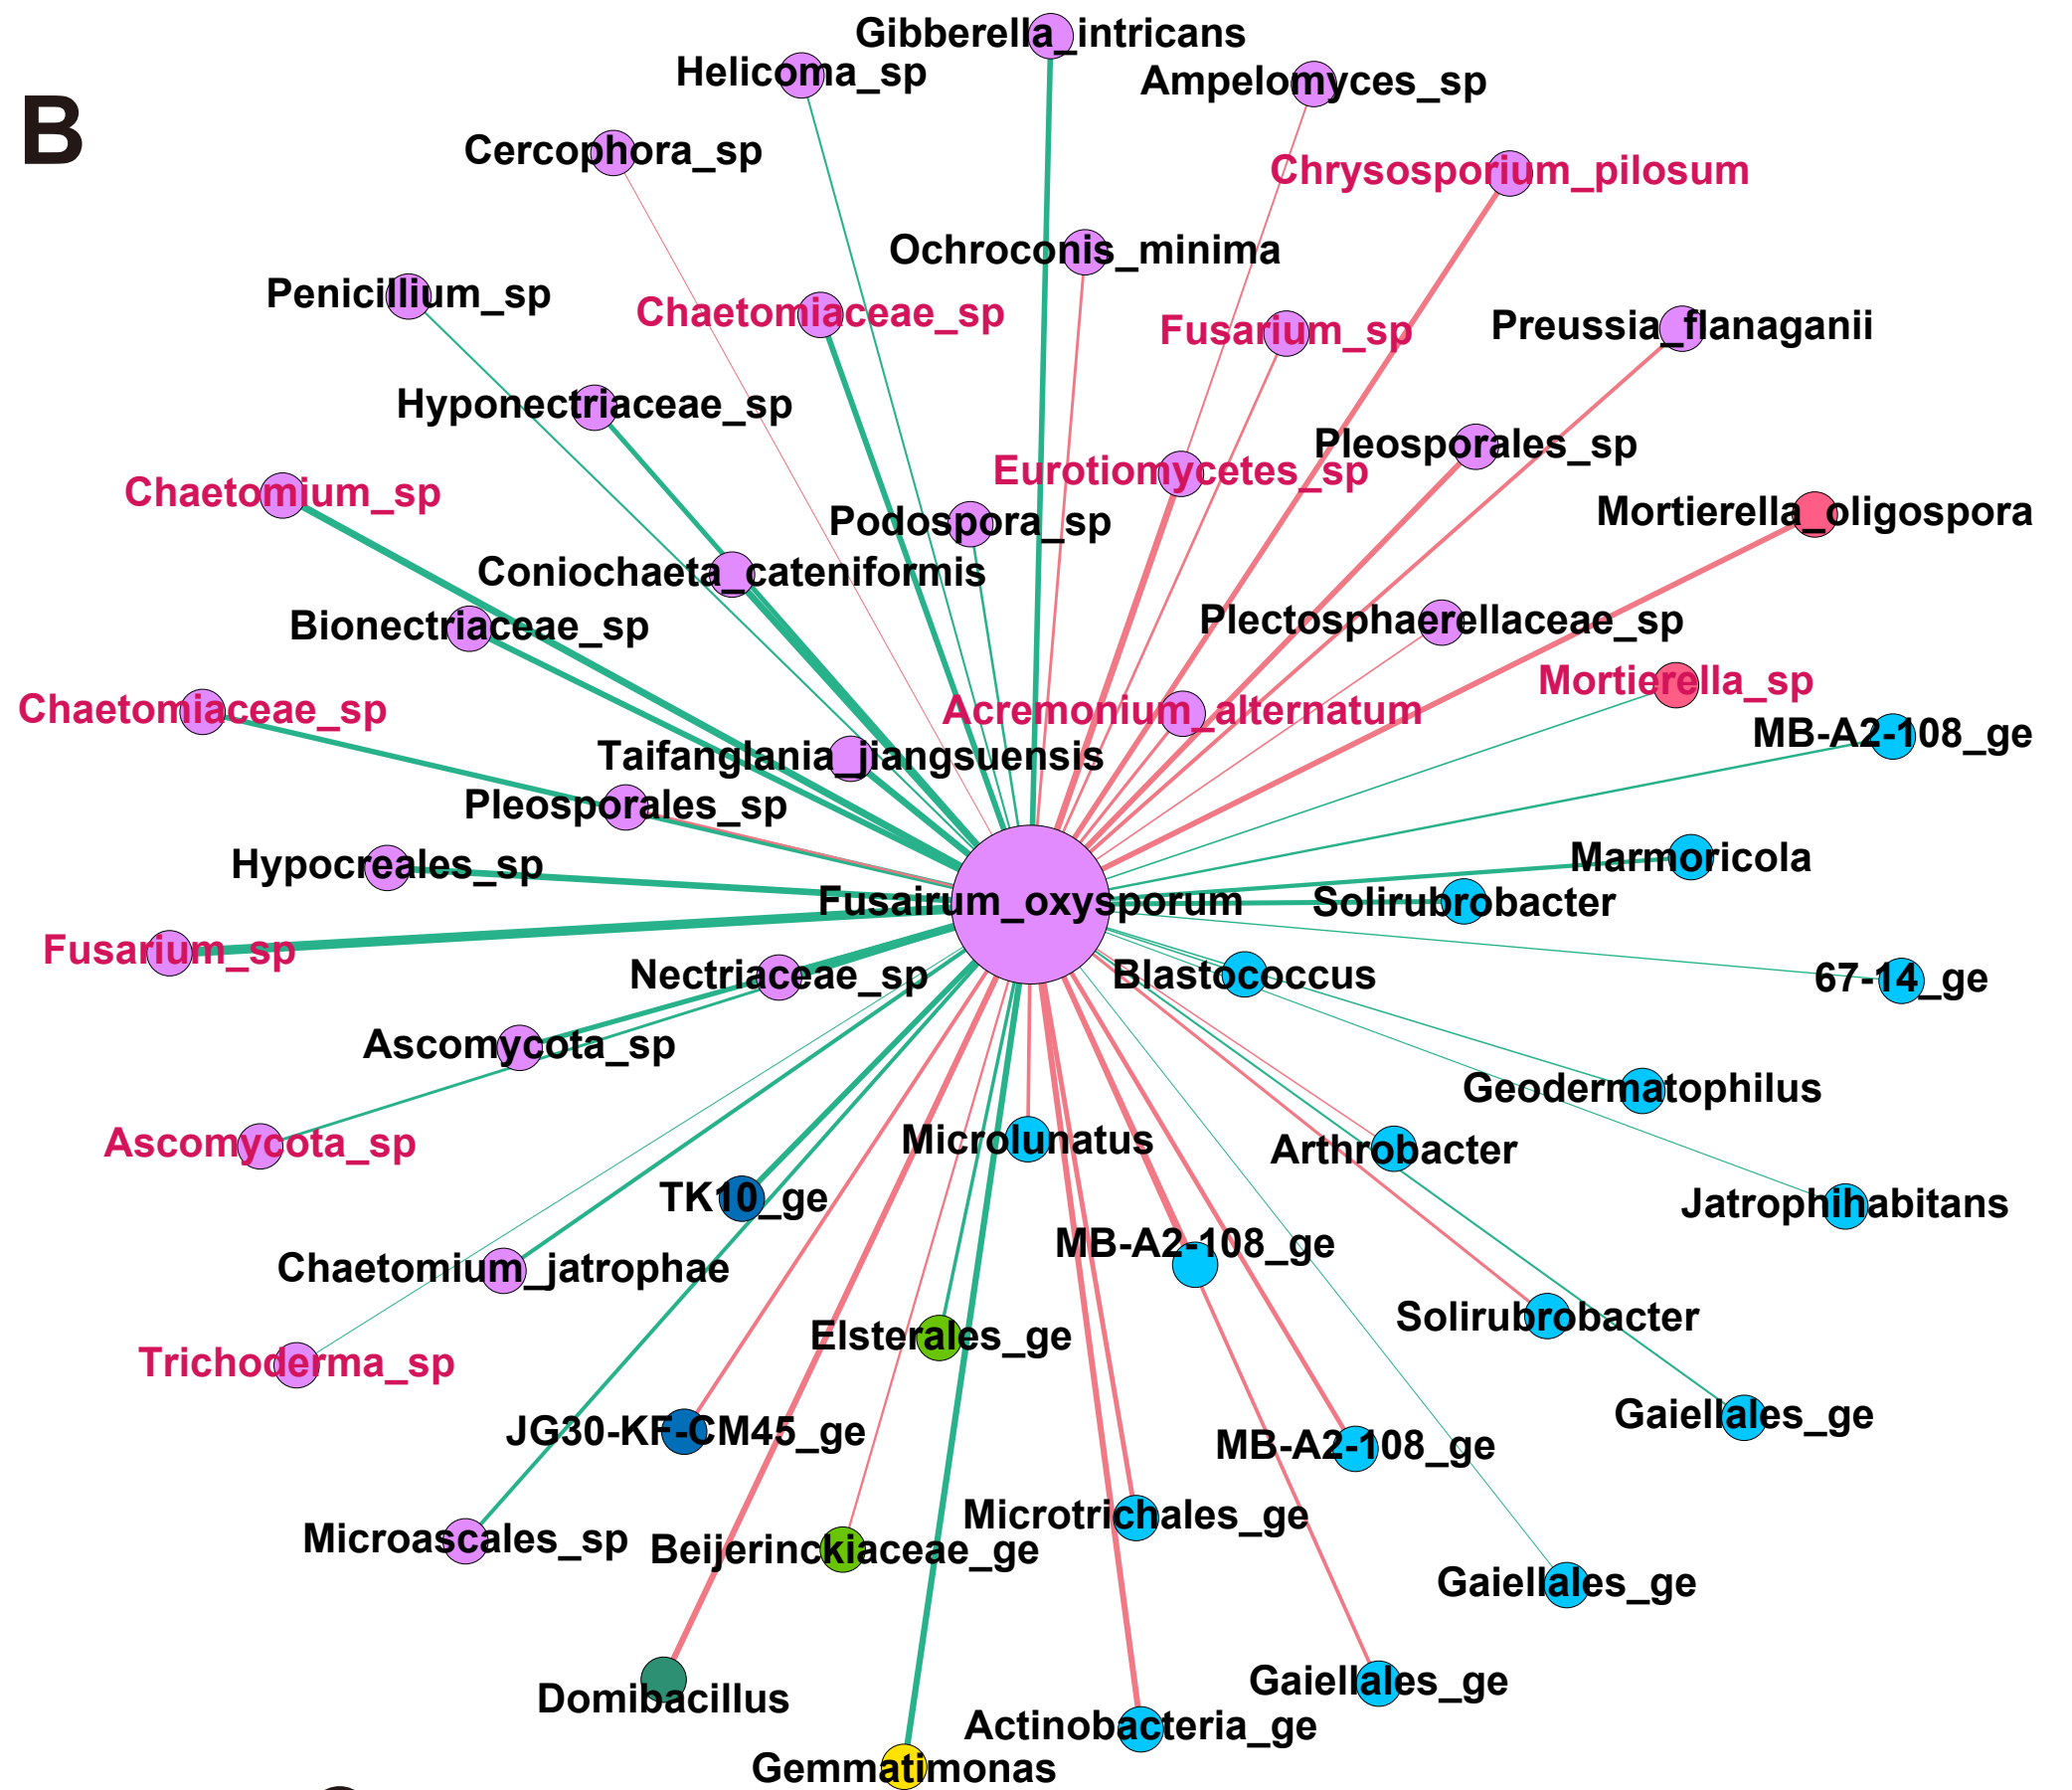

Positive Correlation

Negative Correlation

Correlation 0.6 1.0

Degree

Ascomycota

Basidiomycota

Zygomycota

Actinobacteria

Chloroflexi

Firmicutes

Gemmatimonadetes

Proteobacteria
